# Supplementary material for: Organocatalytic direct difluoromethylation of aldehydes and ketones with TMSCF2H
Source: Royal Society of Chemistry journal article supplement (doi:10.1039/c5ra04472c), 2015-01-01

## Supporting information

### Organocatalytic direct difluoromethylation of aldehydes and ketones with $\text{TMSCF}_2\text{H}$

Guang-Fen Du,<sup>a,b</sup> Ying Wang,<sup>b</sup> Cheng-Zhi Gu,<sup>b</sup> Bin Dai\*<sup>b</sup> and Lin He\*<sup>b</sup>

*<sup>a</sup>School of Chemical Engineering and Technology, Tianjin University,  
Tianjin 300072, P. R. of China*

*<sup>b</sup>School of Chemistry and Chemical Engineering, Shihezi University,  
Xinjiang Uygur Autonomous Region, 832000, China. Fax: (+86)  
993-2057270*

*E-mail: db\_tea@shzu.edu.cn; helin@shzu.edu.cn*

### Contents

1. General Methods & General experimental procedure page S2-S3
2. Spectroscopic data for all products page S3-S11
3. Copies of  $^1\text{H}$ ,  $^{13}\text{C}$  and  $^{19}\text{F}$  NMR spectra page S12-S83

## General Methods

Unless otherwise indicated, all reactions were conducted under nitrogen atmosphere in an oven-dried glassware with magnetic stirring bar. Column chromatograph was performed with silica gel (200~300 mesh) and analytical TLC on silica gel 60-F254.  $^1\text{H}$  NMR (400 MHz,  $\text{CDCl}_3$ ),  $^{13}\text{C}$  NMR (100 MHz,  $\text{CDCl}_3$ ),  $^{19}\text{F}$  NMR (376 MHz,  $\text{CDCl}_3$ ) spectra were recorded on a Bruker-DMX 400 spectrometer in  $\text{CDCl}_3$ , with tetramethylsilane as an internal standard and reported in ppm ( $\delta$ ). N-heterocyclic carbenes **4a** and **4b** were prepared according to literature.<sup>1</sup> N-heterocyclic carbenes **4c** and **4d**, phosphazene bases *t*-Bu-P4 (**5a**), *t*-Bu-P2 (**5b**) and *t*-Bu-P1 (**5c**) were purchased from Sigma-Aldrich.  $\text{TMSCF}_2\text{H}$  **1** was purchased from TCI. All other chemicals were obtained from commercial supplies and used as received. Anhydrous THF and toluene, were distilled from sodium and benzophenone. DMF,  $\text{CH}_2\text{Cl}_2$  and  $\text{CH}_3\text{CN}$  were distilled from calcium hydride.

### General procedure for *t*-Bu-P4-catalyzed direct difluoromethylation reaction of aldehydes

A solution of *t*-Bu-P4 in hexane (25  $\mu\text{L}$ , 10 mol%) was added to a stirred solution of  $\text{TMSCF}_2\text{H}$  **1** (45  $\mu\text{L}$ , 0.45 mmol, 1.5 equiv.) and aldehyde **2** (0.2 mmol) in dry DMF (0.5 mL) under nitrogen. The resulting mixture was stirred at room temperature until full consume of the starting aldehyde indicated by TLC. Then HCl (1.0 mL, 1.0 mol/L) or TBAF (0.4 mmol, 2.0

equiv.) was added to the mixture and stirred for 30 mins at room temperature. The mixture was extracted with Et<sub>2</sub>O (10 mL×3) and the combined organic phase was washed subsequently by sat. aq. NaHCO<sub>3</sub> and water, dried over anhyd. Na<sub>2</sub>SO<sub>4</sub>, filtered, and concentrated. The crude product was purified by flash column chromatography on silica gel (PE-EtOAc, 15:1~10:1) to give the desired product.

### **Experimental Data:**

#### **1-(4-chlorophenyl)-2,2-difluoroethanol (3a)<sup>2</sup>**

Colorless oil. <sup>1</sup>H NMR (400 MHz, CDCl<sub>3</sub>) δ 7.51 – 7.30 (m, 4H), 5.73 (td, *J* = 55.9, 4.7 Hz, 1H), 4.82 (td, *J* = 10.0, 4.7 Hz, 1H), 2.47 (s, 1H); <sup>13</sup>C NMR (101 MHz, CDCl<sub>3</sub>) δ 134.9, 134.1, 128.88, 128.4 (t, *J* = 1.0 Hz), 115.5 (t, *J* = 244.0 Hz), 73.03 (t, *J* = 24.0 Hz); <sup>19</sup>F NMR (376 MHz, CDCl<sub>3</sub>) δ -127.6 (dd, *J* = 301.7, 285.5 Hz, 2F).

#### **2,2-difluoro-1-(4-fluorophenyl)ethanol (3b)<sup>3</sup>**

Colorless oil. <sup>1</sup>H NMR (400 MHz, CDCl<sub>3</sub>) δ 7.55-7.35 (m, 2H), 7.20 – 7.02 (m, 2H), 5.73 (td, *J* = 56.0, 4.8 Hz, 1H), 4.83 (td, *J* = 9.9, 4.7 Hz, 1H), 2.41 (s, 1H); <sup>13</sup>C NMR (101 MHz, CDCl<sub>3</sub>) δ 164.32, 161.85, 131.52 (q, *J* = 3.9 Hz), 128.9 (dt, *J* = 8.0, 1.0 Hz), 115.66 (td, *J* = 244.0, 1.0 Hz), 73.05 (t, *J* = 25.0 Hz); <sup>19</sup>F NMR (376 MHz, CDCl<sub>3</sub>) δ -112.69 (s, 1F), -127.67 (d, *J* = 13.2 Hz, 2F).

#### **1-(4-bromophenyl)-2,2-difluoroethanol (3c)<sup>4</sup>**

Yellow oil. <sup>1</sup>H NMR (400 MHz, CDCl<sub>3</sub>) δ 7.86 – 6.97 (m, 4H), 5.74 (td, *J* =

55.9, 4.7 Hz, 1H), 4.81 (td,  $J = 10.1, 4.7$  Hz, 1H), 2.64 (s, 1H);  $^{13}\text{C}$  NMR (101 MHz,  $\text{CDCl}_3$ )  $\delta$  134.65 (t,  $J = 3.0$  Hz), 131.83, 128.76 (t,  $J = 1.0$  Hz), 123.16, 115.46 (t,  $J = 244.0$  Hz), 73.07 (t,  $J = 24.0$  Hz);  $^{19}\text{F}$  NMR (376 MHz,  $\text{CDCl}_3$ )  $\delta$  -127.20 (d,  $J = 284.9$  Hz, 1F), -128.0 (d,  $J = 284.9$  Hz, 1F).

### **2,2-difluoro-1-phenylethanol (3d)<sup>5</sup>**

Colorless oil.  $^1\text{H}$  NMR (400 MHz,  $\text{CDCl}_3$ )  $\delta$  7.59 – 7.33 (m, 5H), 5.79 (td,  $J = 55.8, 4.72$  Hz, 1H), 4.84 (ddd,  $J = 10.7, 9.7, 4.7$  Hz, 1H), 2.48 (s, 1H);  $^{13}\text{C}$  NMR (101 MHz,  $\text{CDCl}_3$ )  $\delta$  135.82 (t,  $J = 4.0$  Hz), 129.0, 128.7, 127.10, 115.82 (td,  $J = 244, 2.0$  Hz), 73.68 (t,  $J = 25.0$  Hz);  $^{19}\text{F}$  NMR (376 MHz,  $\text{CDCl}_3$ )  $\delta$  -127.6 (dd,  $J = 307.8, 283.8$  Hz, 2F).

### **2,2-difluoro-1-p-tolyethanol (3e)<sup>6</sup>**

Colorless oil.  $^1\text{H}$  NMR (400 MHz,  $\text{CDCl}_3$ )  $\delta$  7.58 – 7.04 (m, 4H), 5.78 (td,  $J = 56.1, 4.8$  Hz, 1H), 4.81 (td,  $J = 10.1, 4.8$  Hz, 1H), 2.40 (s, 4H);  $^{13}\text{C}$  NMR (101 MHz,  $\text{CDCl}_3$ )  $\delta$  138.95, 132.90, 129.39, 127.02, 115.88 (t,  $J = 244.0$  Hz), 99.98, 73.55 (t,  $J = 24.0$  Hz), 21.20;  $^{19}\text{F}$  NMR (376 MHz,  $\text{CDCl}_3$ )  $\delta$  -127.5 (dd,  $J = 297.0, 282.0$  Hz, 2F).

### **2,2-difluoro-1-(4-methoxyphenyl)ethanol (3f)<sup>4</sup>**

Colorless oil.  $^1\text{H}$  NMR (400 MHz,  $\text{CDCl}_3$ )  $\delta$  7.50-7.30 (m, 2H), 7.08-6.85 (m, 2H), 5.76 (td,  $J = 56.1, 4.8$  Hz, 1H), 4.77 (td,  $J = 10.2, 4.8$  Hz, 1H), 3.84 (s, 3H), 2.59 (s, 1H);  $^{13}\text{C}$  NMR (101 MHz,  $\text{CDCl}_3$ )  $\delta$  160.08, 128.44 (t,  $J = 1.0$  Hz) 128.02 (t,  $J = 4.0$  Hz), 118.32, 115.89, 114.11, 113.45, 73.27 (t,  $J = 25.0$  Hz), 55.31;  $^{19}\text{F}$  NMR (376 MHz,  $\text{CDCl}_3$ )  $\delta$  -127.53 (s, 2F).

**1-(2-chlorophenyl)-2,2-difluoroethanol (3g)<sup>4</sup>**

Colorless oil. <sup>1</sup>H NMR (400 MHz, CDCl<sub>3</sub>) δ 7.64 (dd, *J* = 7.5, 2.0 Hz, 1H), 7.50-7.30 (m, 3H), 5.96 (ddd, *J* = 55.6, 54.9, 3.3 Hz, 1H), 5.42 (ddd, *J* = 15.4, 6.5, 3.1 Hz, 1H), 2.61 (s, 1H); <sup>13</sup>C NMR (101 MHz, CDCl<sub>3</sub>) δ 133.48 (t, *J* = 3.0 Hz), 132.80, 130.03, 129.5, 128.64, 127.32, 114.70 (t, *J* = 244 Hz), 70.04 (dd, *J* = 25.0, 23.0 Hz); <sup>19</sup>F NMR (376 MHz, CDCl<sub>3</sub>) δ -126.7 (d, *J* = 280.9 Hz, 1F), -132.1 (d, *J* = 280.9 Hz, 1F).

**1-(3-chlorophenyl)-2,2-difluoroethanol (3h)<sup>4</sup>**

Colorless oil. <sup>1</sup>H NMR (400 MHz, CDCl<sub>3</sub>) δ 7.51-7.44 (m, 1H), 7.43 – 7.30 (m, 3H), 5.76 (td, *J* = 55.9, 4.7 Hz, 1H), 4.83 (td, *J* = 10.0, 4.7 Hz, 1H), 2.58 (s, 1H); <sup>13</sup>C NMR (101 MHz, CDCl<sub>3</sub>) δ 137.65, 134.68, 129.93, 129.20, 129.19, 127.26 (t, *J* = 4.0 Hz), 125.28 (t, *J* = 4.0 Hz), 115.47 (t, *J* = 244.0 Hz), 73.04 (t, *J* = 24.0 Hz); <sup>19</sup>F NMR (376 MHz, CDCl<sub>3</sub>) δ -127.56 (d, *J* = 1.9 Hz, 2F).

**1-(3-bromophenyl)-2,2-difluoroethanol (3i)<sup>7</sup>**

Yellow oil. <sup>1</sup>H NMR (400 MHz, CDCl<sub>3</sub>) δ 7.73 – 7.48 (m, 2H), 7.47 – 7.21 (m, 2H), 5.76 (td, *J* = 55.8, 4.7 Hz, 1H), 4.82 (td, *J* = 10.0, 4.7 Hz, 1H), 2.71 (s, 1H); <sup>13</sup>C NMR (101 MHz, CDCl<sub>3</sub>) δ 137.89 (t, *J* = 3.0 Hz), 132.1, 130.21, 130.15 (t, *J* = 1.0 Hz), 125.77 (t, *J* = 1.0 Hz), 122.78, 115.46 (t, *J* = 245.0 Hz); <sup>19</sup>F NMR (376 MHz, CDCl<sub>3</sub>) δ -127.53 (d, *J* = 1.40 Hz, 2F).

**2,2-difluoro-1-(2-methoxyphenyl)ethanol (3j)<sup>4</sup>**

White solid.  $^1\text{H}$  NMR (400 MHz,  $\text{CDCl}_3$ )  $\delta$  7.52 – 7.31 (m, 2H), 7.04 (td,  $J = 7.48, 1.0$  Hz, 1H), 6.95 (d,  $J = 8.28$  Hz, 1H), 5.99 (ddd,  $J = 56.7, 55.5, 4.1$  Hz, 1H), 5.05 (ddd,  $J = 14.8, 7.4, 4.1$  Hz, 1H), 3.90 (d,  $J = 4.0$  Hz, 3H), 3.12 (s, 1H);  $^{13}\text{C}$  NMR (101 MHz,  $\text{CDCl}_3$ )  $\delta$  156.80, 129.97 (d,  $J = 2.0$  Hz), 128.84, 124.03, 121.14 (d,  $J = 2.0$  Hz), 115.05 (t,  $J = 244.0$  Hz), 110.75 (d,  $J = 2.0$  Hz), 71.11 (t,  $J = 24.0$  Hz), 55.50 (d,  $J = 1.0$  Hz);  $^{19}\text{F}$  NMR (376 MHz,  $\text{CDCl}_3$ )  $\delta$  -125.6 (d,  $J = 280.7$  Hz, 1F), -130.2 (d,  $J = 280.7$  Hz, 1F).

### **2,2-difluoro-1-(3-methoxyphenyl)ethanol (3k)<sup>7</sup>**

Colorless oil.  $^1\text{H}$  NMR (400 MHz,  $\text{CDCl}_3$ )  $\delta$  7.34 (dd,  $J = 11.8, 4.2$  Hz, 1H), 7.12 – 6.85 (m, 3H), 5.78 (ddd,  $J = 56.3, 55.6, 4.7$  Hz, 1H), 4.81 (ddd,  $J = 11.1, 9.2, 4.7$  Hz, 1H), 3.84 (s, 3H), 2.64 (s, 1H);  $^{13}\text{C}$  NMR (101 MHz,  $\text{CDCl}_3$ )  $\delta$  159.81, 137.41 (q,  $J = 2.0$  Hz), 129.75, 119.33 (t,  $J = 1.0$  Hz), 118.20, 115.76, 114.56, 113.32, 112.60 (t,  $J = 1.0$  Hz), 73.58 (dd,  $J = 25.0, 25.0$  Hz), 55.3;  $^{19}\text{F}$  NMR (376 MHz,  $\text{CDCl}_3$ )  $\delta$  -126.97 (d,  $J = 285.7$  Hz, 1F), -127.93 (d,  $J = 285.7$  Hz, 1F).

### **2,2-difluoro-1-(naphthalen-1-yl)ethanol (3l)<sup>2</sup>**

Colorless oil.  $^1\text{H}$  NMR (400 MHz,  $\text{CDCl}_3$ )  $\delta$  8.11 (d,  $J = 8.2$  Hz, 1H), 7.93 (td,  $J = 7.8, 4.9$  Hz, 2H), 7.74 (d,  $J = 7.0$  Hz, 1H), 7.66-7.46 (m, 3H), 6.05 (ddd,  $J = 56.5, 55.1, 4.6$  Hz, 1H), 5.66 (ddd,  $J = 12.2, 7.3, 4.6$  Hz, 1H), 2.64 (s, 1H);  $^{13}\text{C}$  NMR (101 MHz,  $\text{CDCl}_3$ )  $\delta$  133.80, 131.75 (q,  $J = 2.0$  Hz), 130.99, 129.65, 129.05, 126.69, 125.94, 125.32, 125.23 (t,  $J = 1.0$  Hz), 122.90 (d,  $J = 1.0$  Hz), 118.32, 115.87 (t,  $J = 245.0$  Hz), 70.62 (t,  $J = 23.0$  Hz);

-126.97 (d,  $J = 285.7$  Hz, 1F), -127.93 (d,  $J = 285.7$  Hz, 1F).

**2,2-difluoro-1-(naphthalen-2-yl)ethanol (3m)<sup>4</sup>**

White solid. <sup>1</sup>H NMR (400 MHz, CDCl<sub>3</sub>)  $\delta$  7.97 – 7.85 (m, 4H), 7.70-7.40 (m, 3H), 5.89 (td,  $J = 56.0, 4.68$  Hz, 1H), 5.02 (td,  $J = 10.1, 4.7$  Hz, 1H), 5.02 (td,  $J = 10.1, 4.7$  Hz, 1H), 2.61 (s, 1H), 2.61 (s, 1H); <sup>13</sup>C NMR (101 MHz, CDCl<sub>3</sub>)  $\delta$  133.56, 133.20 (t,  $J = 4.0$  Hz), 133.09, 128.55, 128.15, 127.77, 126.64, 126.61, 126.50, 124.32, 115.88, (t,  $J = 244.0$  Hz) 113.44, 73.83 (t,  $J = 25.0$  Hz); <sup>19</sup>F NMR (376 MHz, CDCl<sub>3</sub>)  $\delta$  -127.3 (dd,  $J = 323.7, 284.0$  Hz, 2F).

**1-(benzo[d][1,3]dioxol-5-yl)-2,2-difluoroethanol (3n)<sup>7</sup>**

Colorless oil. <sup>1</sup>H NMR (400 MHz, CDCl<sub>3</sub>)  $\delta$  6.95-6.75 (m, 3H), 5.96 (s, 2H), 5.71 (td,  $J = 56.0, 4.8$  Hz, 1H), 4.71 (td,  $J = 10.0, 4.7$  Hz, 1H), 2.51 (s, 1H); <sup>13</sup>C NMR (101 MHz, CDCl<sub>3</sub>)  $\delta$  148.14, 147.98, 129.6 (t,  $J = 4.0$  Hz), 120.90 (t,  $J = 1.0$  Hz), 115.75 (t,  $J = 243.0$  Hz) 108.3, 107.45 (t,  $J = 1.0$  Hz), 101.3, 73.45 (t,  $J = 250.0$  Hz); <sup>19</sup>F NMR (376 MHz, CDCl<sub>3</sub>)  $\delta$  -127.53 (dd,  $J = 7.1, 3.5$  Hz, 2F).

**2,2-difluoro-1-(furan-2-yl)ethanol (3o)<sup>7</sup>**

Colorless oil. <sup>1</sup>H NMR (400 MHz, CDCl<sub>3</sub>)  $\delta$  7.48 (dd,  $J = 1.8, 0.7$  Hz, 1H), 6.72 – 6.30 (m, 2H), 5.99 (ddd,  $J = 55.9, 55.3, 4.3$  Hz, 1H), 2.41(s, 1H); <sup>13</sup>C NMR (101 MHz, CDCl<sub>3</sub>)  $\delta$  143.39, 116.64, 114.20, 111.76, 110.62, 109.50 (t,  $J = 2.0$  Hz), 68.10, 67.84 (dd,  $J = 27.0, 26.0$  Hz); <sup>19</sup>F NMR (376 MHz, CDCl<sub>3</sub>)  $\delta$  -128.4 (dd,  $J = 532.5, 286.4$ Hz, 2F).

**2,2-difluoro-1-(thiophen-2-yl)ethan-1-ol (3p)<sup>7</sup>**

Yellow oil. <sup>1</sup>H NMR (400 MHz, CDCl<sub>3</sub>) δ 7.40 (dd, *J* = 5.1, 1.2 Hz, 1H), 7.17 (d, *J* = 3.5 Hz, 1H), 7.07 (dd, *J* = 5.1, 3.6 Hz, 1H), 5.85 (td, *J* = 55.9, 4.5 Hz, 1H), 5.11 (ddd, *J* = 7.0, 5.0, 2.5 Hz, 1H), 2.53 (s, 1H); <sup>13</sup>C NMR (101 MHz, CDCl<sub>3</sub>) δ 138.24 (t, *J* = 3.0 Hz), 127.10, 126.55, 126.53, 117.49, 115.0 (t, *J* = 245.0 Hz), 70.09 (t, *J* = 25.0 Hz); <sup>19</sup>F NMR (376 MHz, CDCl<sub>3</sub>) δ -127.42 (dd, *J* = 297.0, 285.8 Hz, 2F).

**2,2-difluoro-1-(1-methyl-1H-pyrrol-2-yl)ethan-1-ol (3q)**

Colorless oil. <sup>1</sup>H NMR (400 MHz, CDCl<sub>3</sub>) δ 6.69 (s, 1H), 6.32-6.05 (m, 2H), 6.00 (td, *J* = 53.8, 3.9 Hz, 1H), 4.94 – 4.78 (m, 1H), 3.71 (s, 3H), 2.07 (s, 1H); <sup>13</sup>C NMR (101 MHz, CDCl<sub>3</sub>) δ 127.08, 124.3, 115.1 (t, *J* = 241.0 Hz), 108.4, 107.4, 66.6 (tm, *J* = 26.0 Hz), 34.18; <sup>19</sup>F NMR (376 MHz, CDCl<sub>3</sub>) δ -125.3 (d, *J* = 282.0 Hz, 1F), -128.0 (d, *J* = 285.7 Hz, 1F); GC-MS (EI): *M/z* 161.1 (*M*<sup>+</sup>).

**2,2-difluoro-1-(1-methyl-1H-indol-4-yl)ethan-1-ol (3r)**

Yellow oil. <sup>1</sup>H NMR (400 MHz, CDCl<sub>3</sub>) δ 7.39 (d, *J* = 8.0 Hz, 1H), 7.29 (dd, *J* = 9.6, 5.6 Hz, 1H), 7.24 (d, *J* = 6.9 Hz, 1H), 7.15 (d, *J* = 3.1 Hz, 1H), 6.64 (d, *J* = 3.1 Hz, 1H), 6.02 (ddd, *J* = 56.8, 55.4, 4.9 Hz, 1H), 5.23 (ddd, *J* = 12.5, 7.96, 4.92 Hz, 1H), 2.45 (s, 1H); <sup>13</sup>C NMR (101 MHz, CDCl<sub>3</sub>) δ 136.95, 129.46, 127.80, 126.59, 121.54, 117.95, 115.7 (dd, *J* = 245.0, 243.0 Hz), 110.18, 99.21, 73.0 (dd, *J* = 27.0, 23.0 Hz), 33.00; GC-MS (EI): *M/z* 211.1 (*M*<sup>+</sup>).



**2,2-difluoro-1-(isoquinolin-5-yl)ethan-1-ol (3s)<sup>7</sup>**

White solid. <sup>1</sup>H NMR (400 MHz, DMSO) δ 9.47 – 9.23 (m, 1H), 8.54 (dd, *J* = 6.3, 2.6 Hz, 1H), 8.20 – 8.04 (m, 2H), 8.03 – 7.86 (m, 1H), 7.74 (td, *J* = 8.3, 2.7 Hz, 1H), 6.51 (dd, *J* = 5.3, 2.1 Hz, 1H), 6.26 (dddd, *J* = 55.4, 50.8, 4.4, 2.4 Hz, 1H), 5.66 – 5.46 (m, 1H); <sup>13</sup>C NMR (101 MHz, CDCl<sub>3</sub>) δ 153.4, 143.5, 130.5, 128.8, 128.7, 127.3, 117.4, 116.7 (t, *J* = 242.0 Hz), 99.9, 68.8 (t, *J* = 24.0 Hz); <sup>19</sup>F NMR (376 MHz, DMSO) δ -125.7 (dd, *J* = 661.7, 278.2 Hz, 2F).

**1-(2,3-dihydrobenzofuran-5-yl)-2,2-difluoroethan-1-ol (3t)<sup>7</sup>**

Colorless oil. <sup>1</sup>H NMR (400 MHz, CDCl<sub>3</sub>) δ 7.28 (s, 1H), 7.16 (d, *J* = 8.2 Hz, 1H), 6.81 (d, *J* = 8.2 Hz, 1H), 5.76 (td, *J* = 56.1, 4.8 Hz, 1H), 4.76 (td, *J* = 10.1, 4.8 Hz, 1H), 4.61 (t, *J* = 8.8 Hz, 2H), 3.24 (t, *J* = 8.7 Hz, 2H), 2.43 (s, 1H); <sup>13</sup>C NMR (101 MHz, CDCl<sub>3</sub>) δ 160.74, 127.94, 127.69, 127.34, 123.82, 115.95 (t, *J* = 244.0 Hz), 109.35, 73.57 (t, *J* = 25.0 Hz), 71.51, 29.56; <sup>19</sup>F NMR (376 MHz, CDCl<sub>3</sub>) δ -127.43 (d, *J* = 3.76 Hz, 2F).

**(E)-1,1-difluoro-4-phenylbut-3-en-2-ol (3u)<sup>4</sup>**

Yellow oil. <sup>1</sup>H NMR (400 MHz, CDCl<sub>3</sub>) δ 7.52 – 7.29 (m, 5H), 6.84 (d, *J* = 16.0 Hz, 1H), 6.24 (ddd, *J* = 16.0, 6.2, 0.7 Hz, 1H), 5.75 (td, *J* = 56.0, 5.3 Hz, 1H), 4.58 – 4.42 (m, 1H), 2.13 (s, 1H); <sup>13</sup>C NMR (101 MHz, CDCl<sub>3</sub>) δ 135.7, 134.8, 128.6, 128.43, 126.7, 122.4 (dd, *J* = 4.0, 3.0 Hz), 115.47 (t, *J* = 244.0 Hz), 72.24 (t, *J* = 24.0 Hz); <sup>19</sup>F NMR (376 MHz, CDCl<sub>3</sub>) δ -128.6 (dd, *J* = 130.6, 90.3 Hz, 2F).

### **1,1-difluoro-4-phenylbutan-2-ol (3v)<sup>4</sup>**

Colorless oil. <sup>1</sup>H NMR (400 MHz, CDCl<sub>3</sub>) δ 7.42 – 7.14 (m, 5H), 5.64 (tt, *J* = 56.1, 3.7 Hz, 1H), 3.85-3.60 (m, 1H), 3.02 – 2.66 (m, 2H), 2.05 – 1.75 (m, 2H), 1.96 (s, 1H); <sup>13</sup>C NMR (101 MHz, CDCl<sub>3</sub>) δ 140.89, 128.57, 128.47, 126.20, 116.29 (t, *J* = 243.0 Hz), 70.30 (t, *J* = 24.0 Hz), 31.50, 30.94; <sup>19</sup>F NMR (376 MHz, CDCl<sub>3</sub>) δ -129.6 (s, 2F).

### **1,1-bis(4-chlorophenyl)-2,2-difluoroethanol (8a)<sup>4</sup>**

Yellow oil. <sup>1</sup>H NMR (400 MHz, CDCl<sub>3</sub>) δ 7.48 (dd, *J* = 1.8, 0.7 Hz, 1H), 6.53-6.35 (m, 2H), 5.99 (td, *J* = 55.2, 4.3 Hz, 1H); <sup>13</sup>C NMR (101 MHz, CDCl<sub>3</sub>) δ 138.46 (t, *J* = 1.0 Hz), 134.61, 128.67, 128.55 (t, *J* = 2.0 Hz), 77.52 (t, *J* = 21.0 Hz); <sup>19</sup>F NMR (376 MHz, CDCl<sub>3</sub>) δ -127.2 (s, 2F).

### **9-(difluoromethyl)-9H-fluoren-9-ol (8b)<sup>4</sup>**

White solid. <sup>1</sup>H NMR (400 MHz, CDCl<sub>3</sub>) δ 7.85 – 7.21 (m, 8H), 5.89 (td, *J* = 55.4, 2.5 Hz, 1H), 2.65 (s, 1H); <sup>13</sup>C NMR (101 MHz, CDCl<sub>3</sub>) δ 142.15 (t, *J* = 1.0 Hz), 140.80, 130.40, 128.28, 125.37 (t, *J* = 2.0 Hz), 120.34, 115.67 (t, *J* = 248.0 Hz), 81.33 (22.0 Hz); <sup>19</sup>F NMR (376 MHz, CDCl<sub>3</sub>) δ -128.9 (s, 2F).

## **Reference**

1. A. J. Arduengo III, R. Krafczyk and R. Schmutzler, *Tetrahedron* 1999, 55, 14523.
2. P. Beier, A. V. Alexandrova, M. Zibinsky and G. K. Surya Prakash, *Tetrahedron*, 2008, 64, 10977.

3. S. A. Fuqua, R. M. Parkhurst and R. M. Silverstein, *Tetrahedron*, 1964, 20, 1625.
4. Y. Zhao, W. Huang, J. Zheng and J. Hu, *Org. Lett.*, 2011, 13, 5342.
5. S. Mizuta, N. Shibata, S. Ogawa, H. Fujimoto, S. Nakamura and T. Toru, *Chem. Commun.*, 2006, 2575
6. S. Kaneko, T. Yamazaki and T. Kitazume, *J. Org. Chem.*, 1993, 58, 2302.
7. **3i**, cas: 1540018-38-9; **3k**, cas: 1515191-06-6; **3n**, cas: 1379336-81-8; **3o**, cas: 1378582-48-9 ; **3p**, cas :1379271-50-7 ; **3s**, cas : 1564865-41-3 ; **3t**, cas : 1379365-06-6.

# Copies of $^1\text{H}$ NMR and $^{13}\text{C}$ NMR Spectra

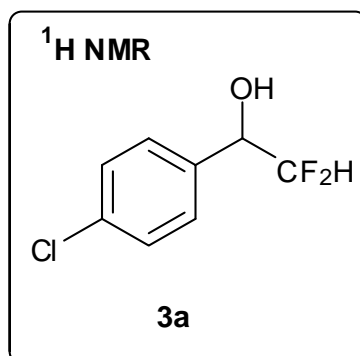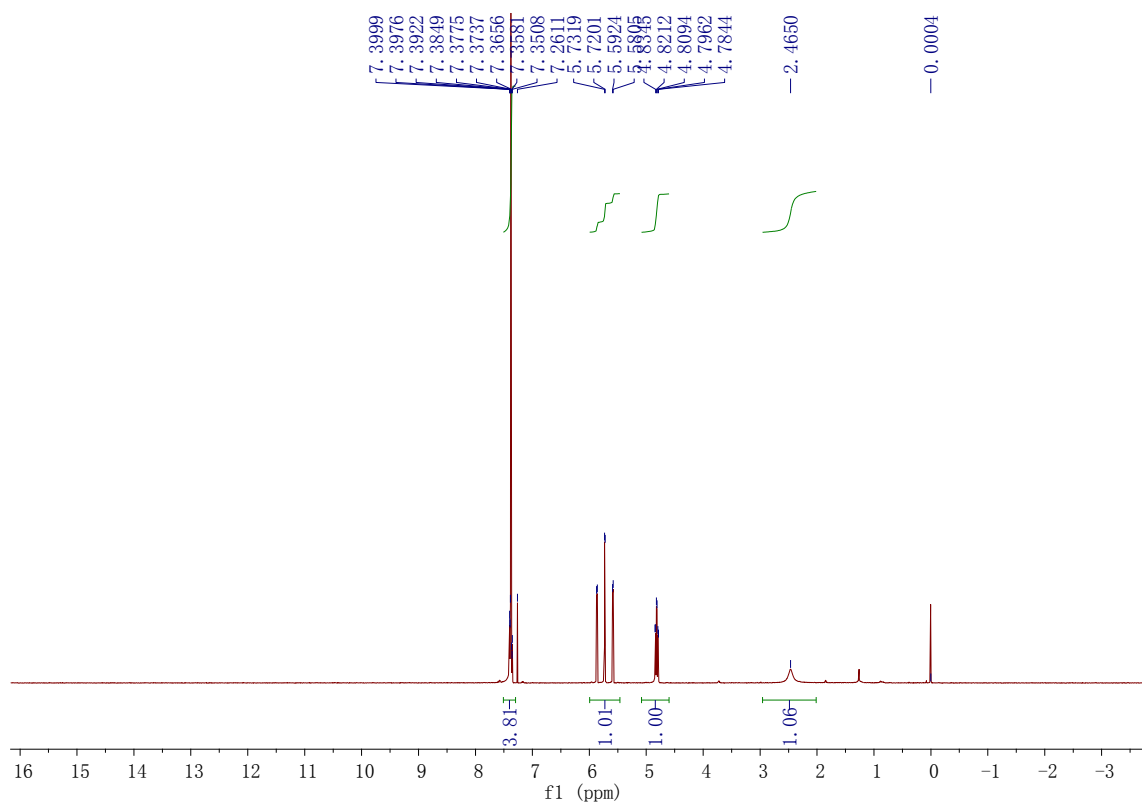

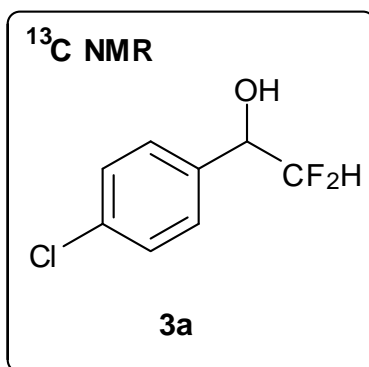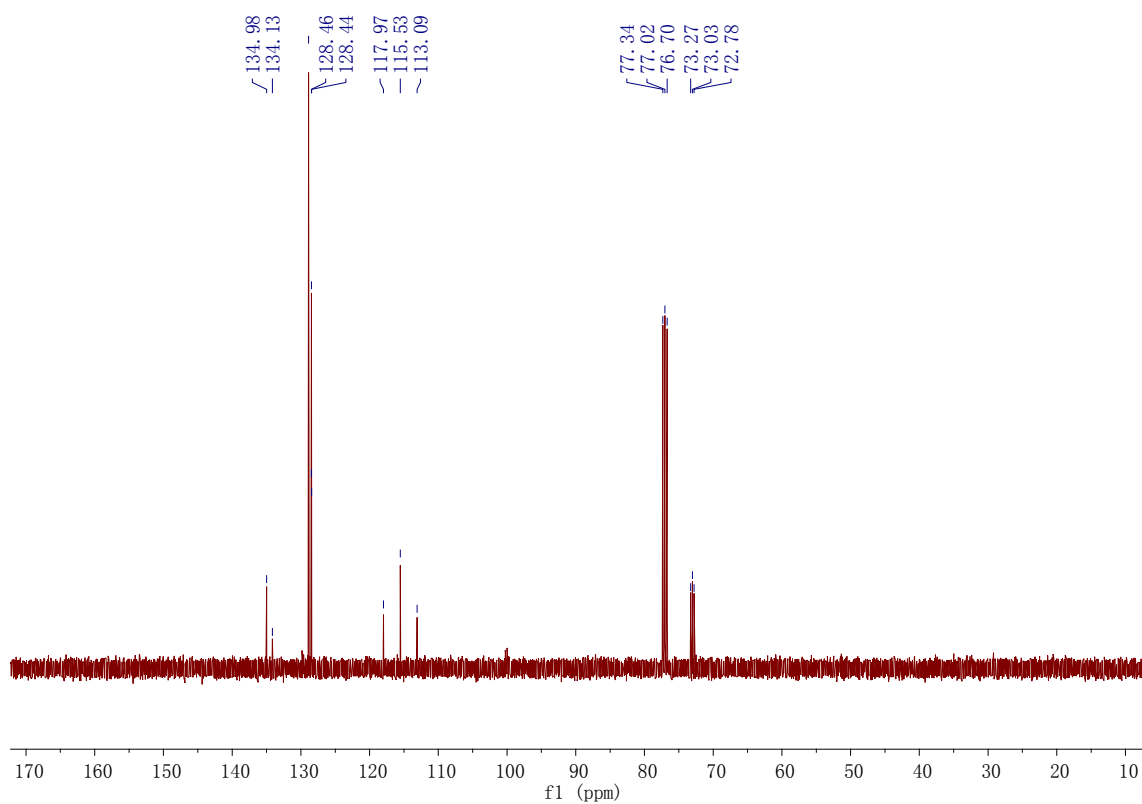

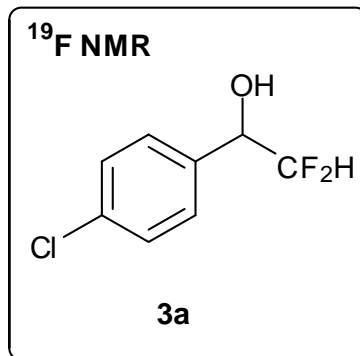

--126.8471  
--127.6048  
--127.6090  
--127.6495  
--128.4074

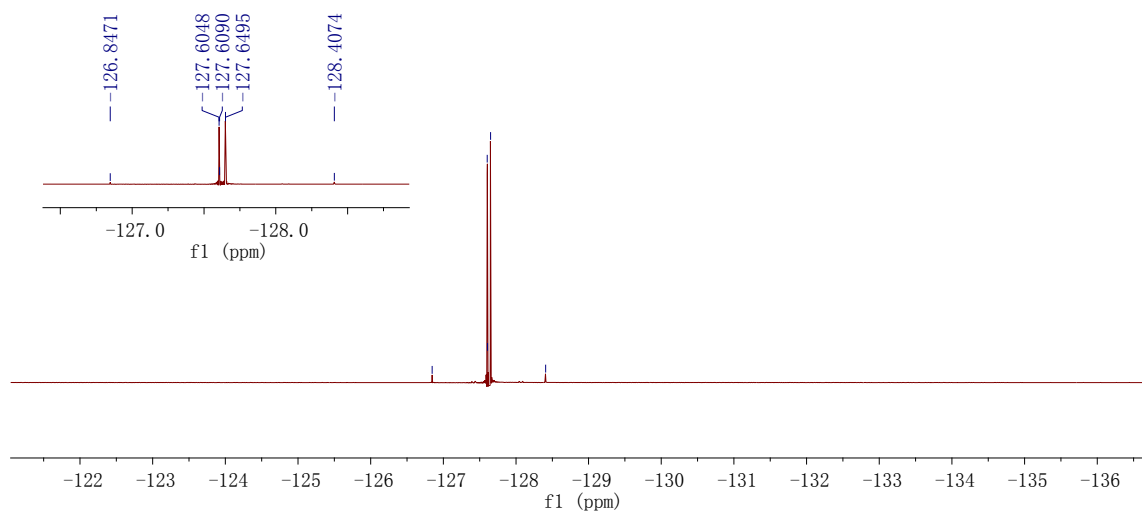

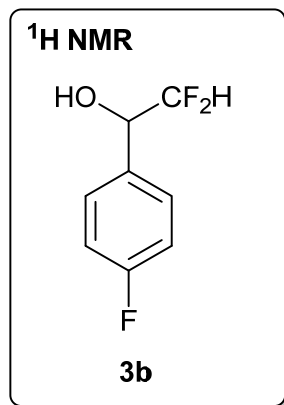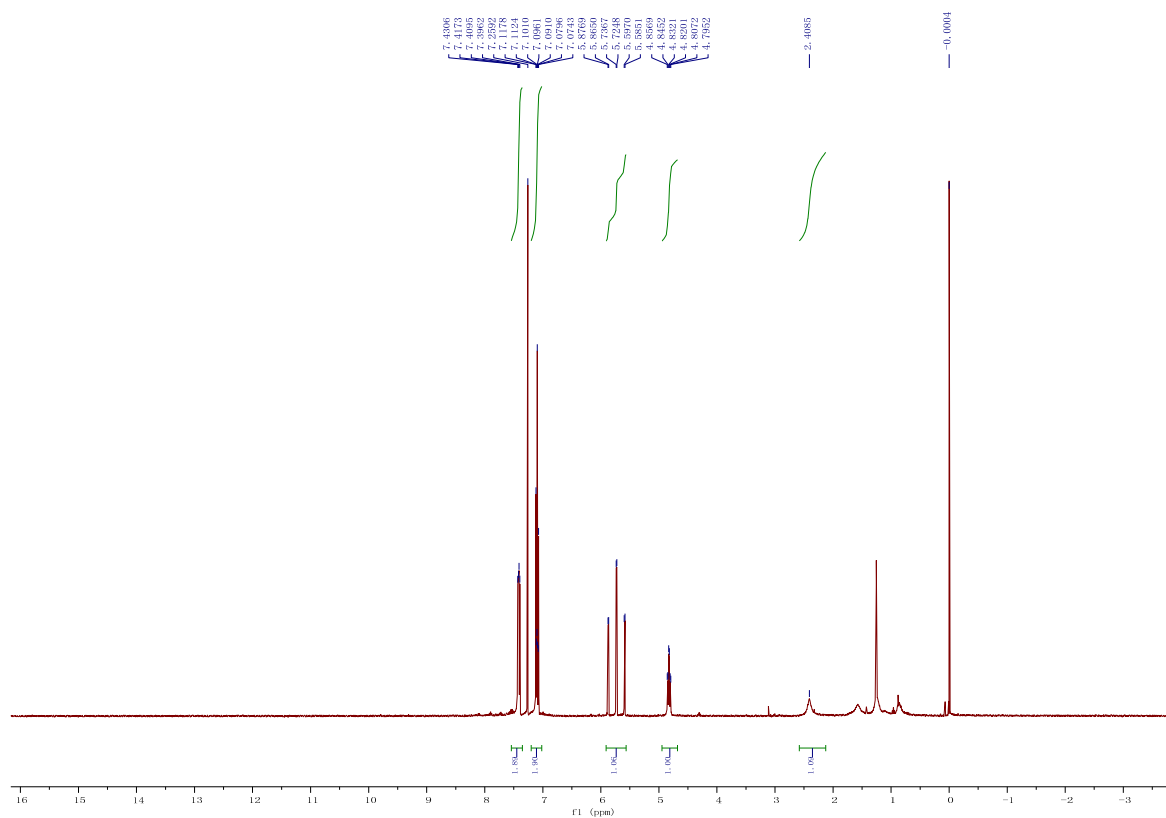

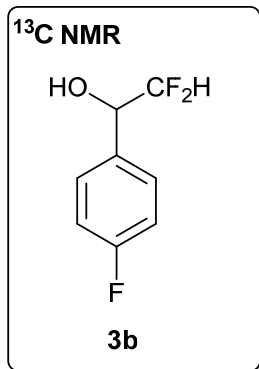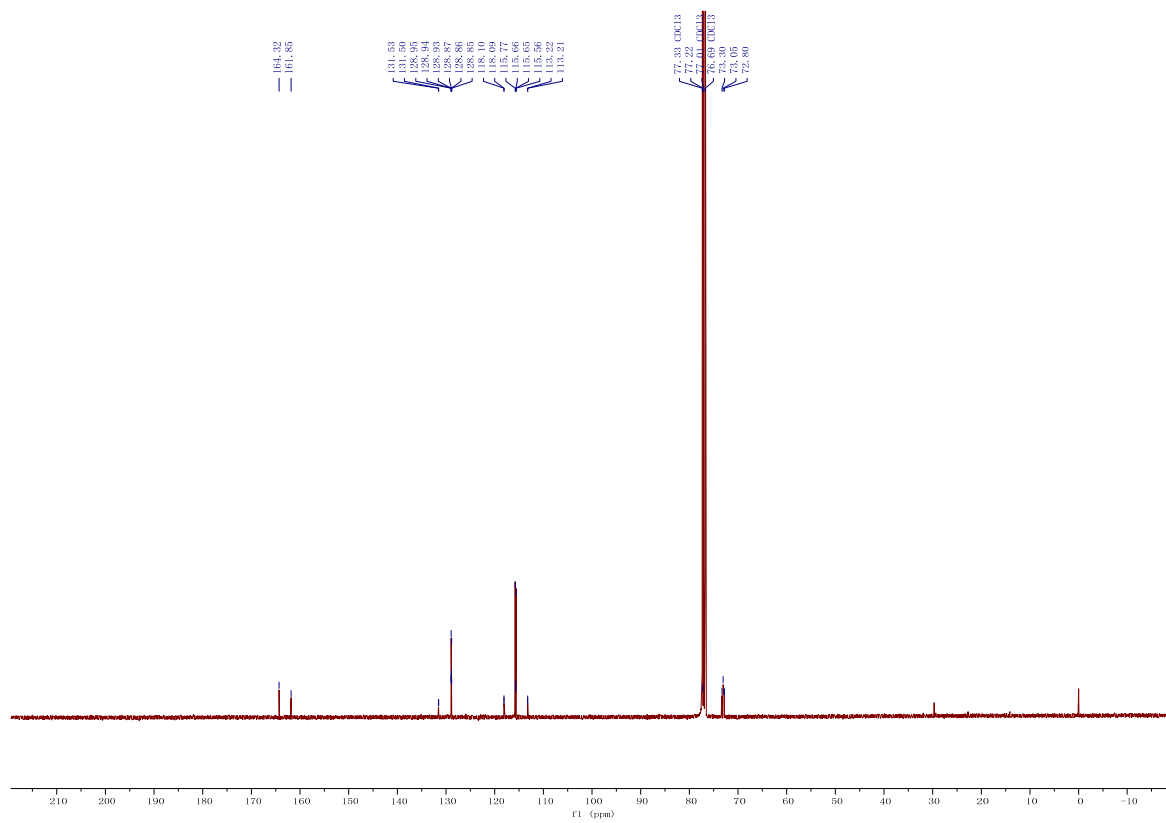



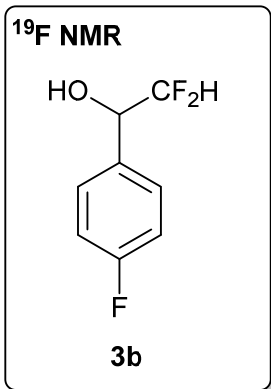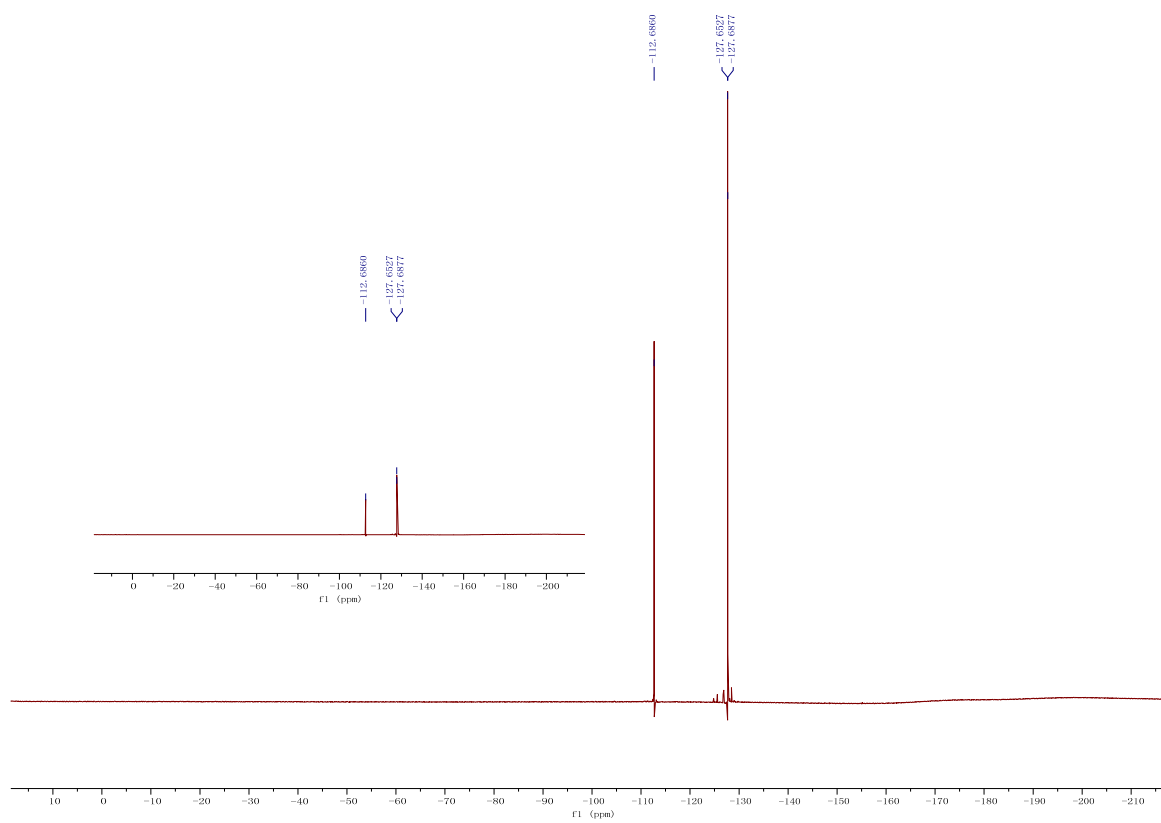

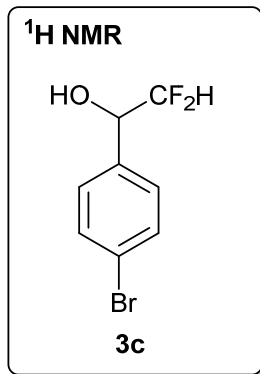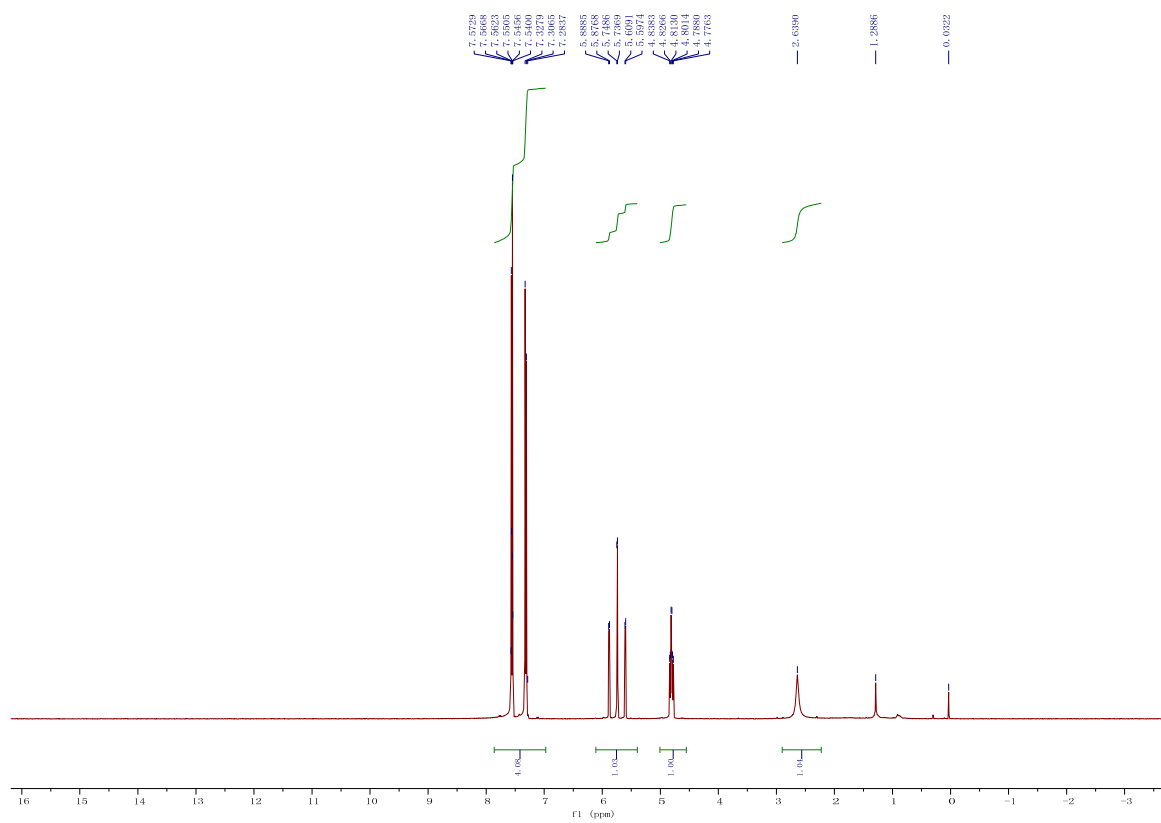

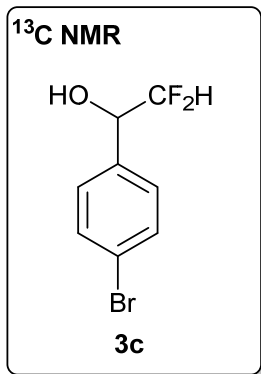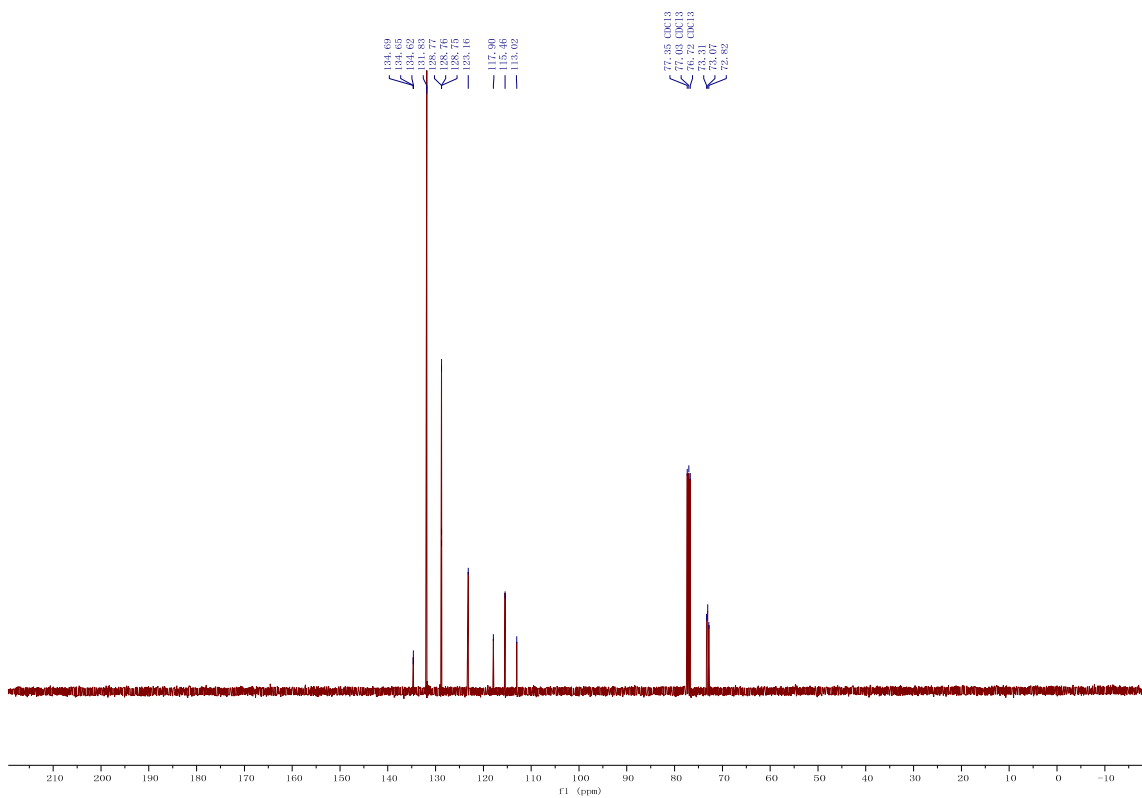

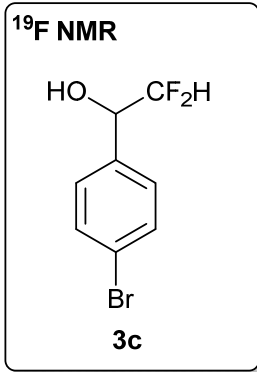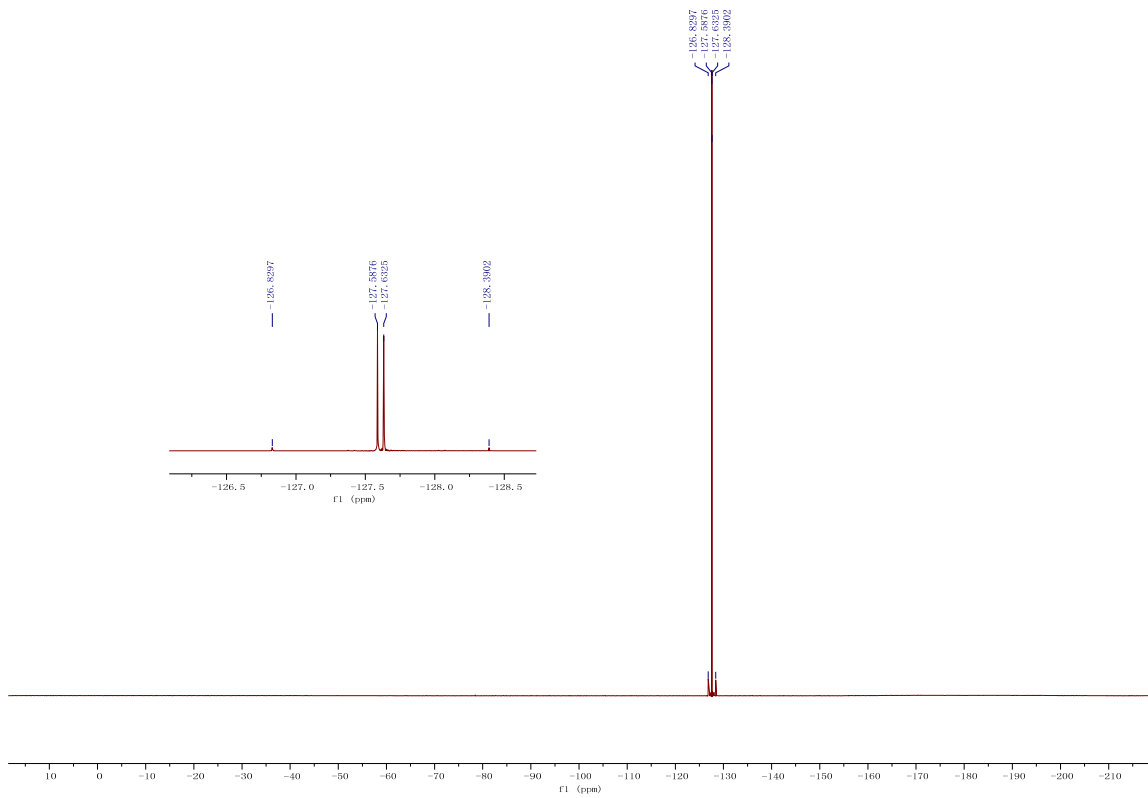

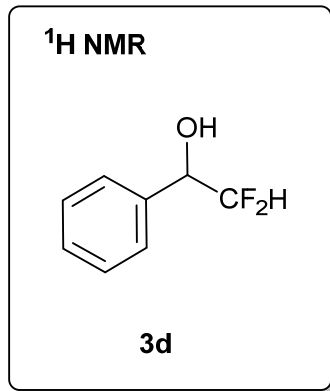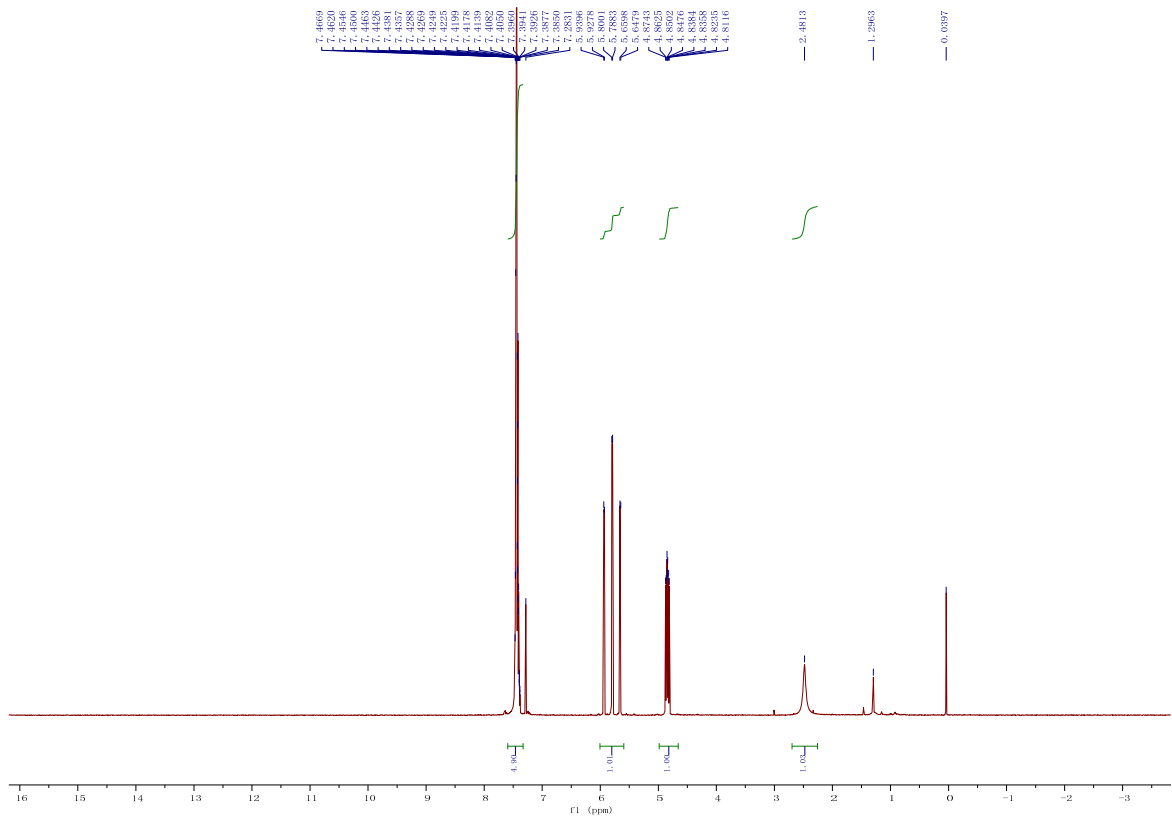

**<sup>13</sup>C NMR**

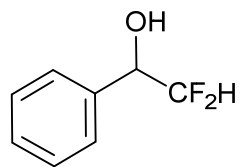

**3d**

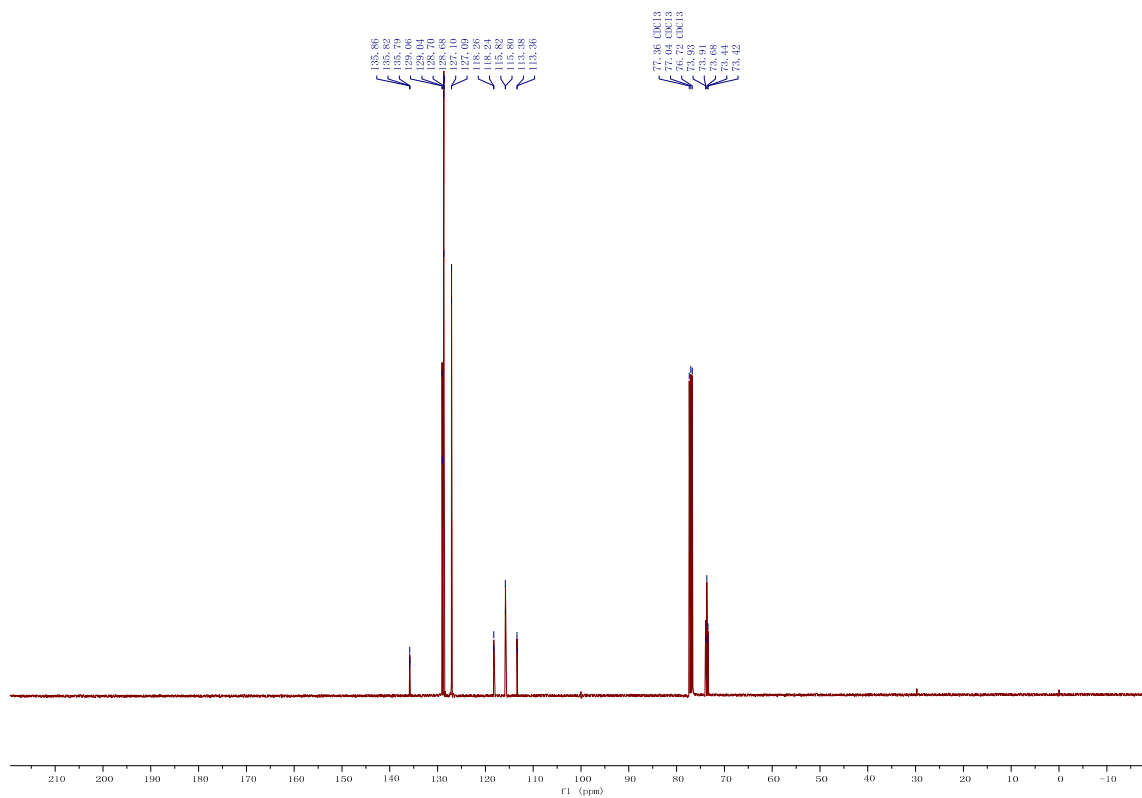

<sup>19</sup>F NMR

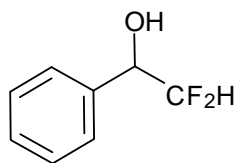

3d

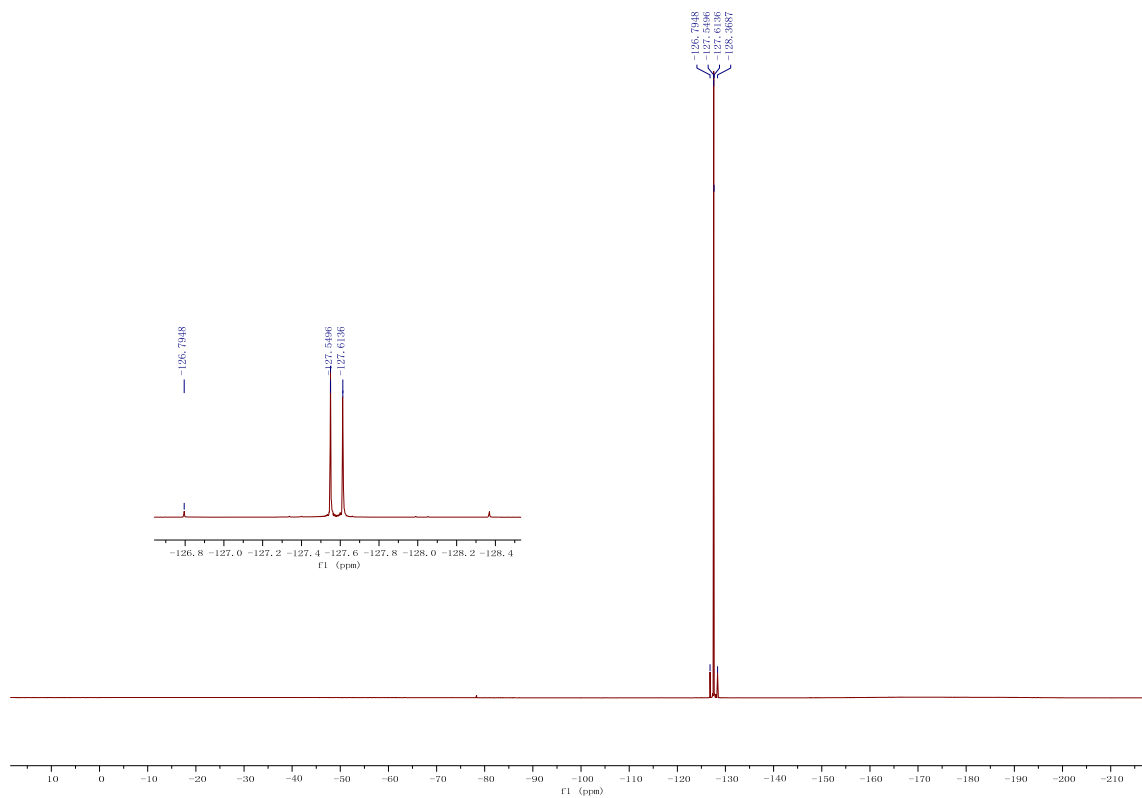

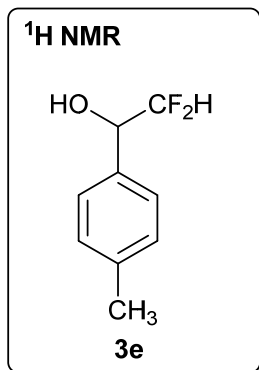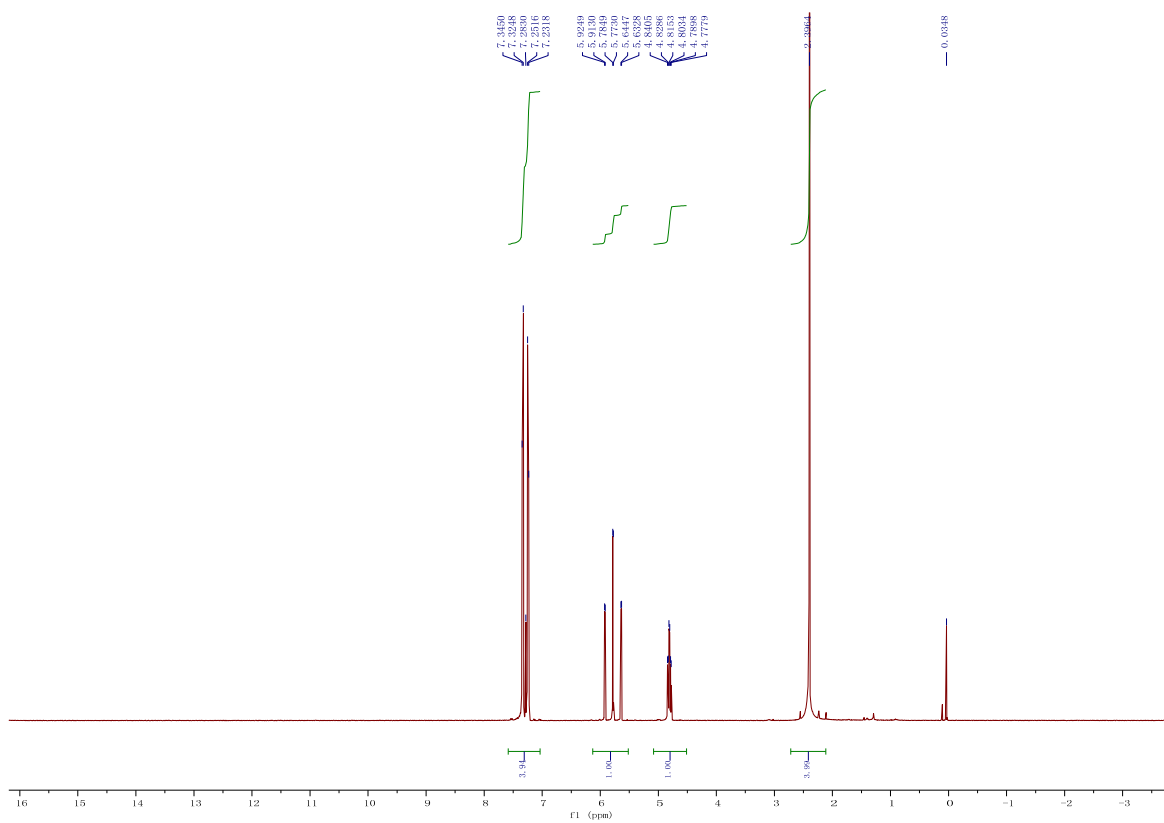



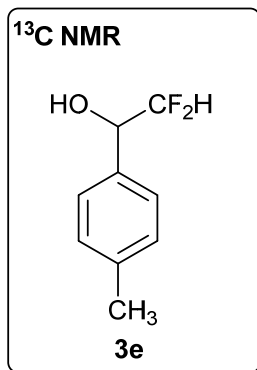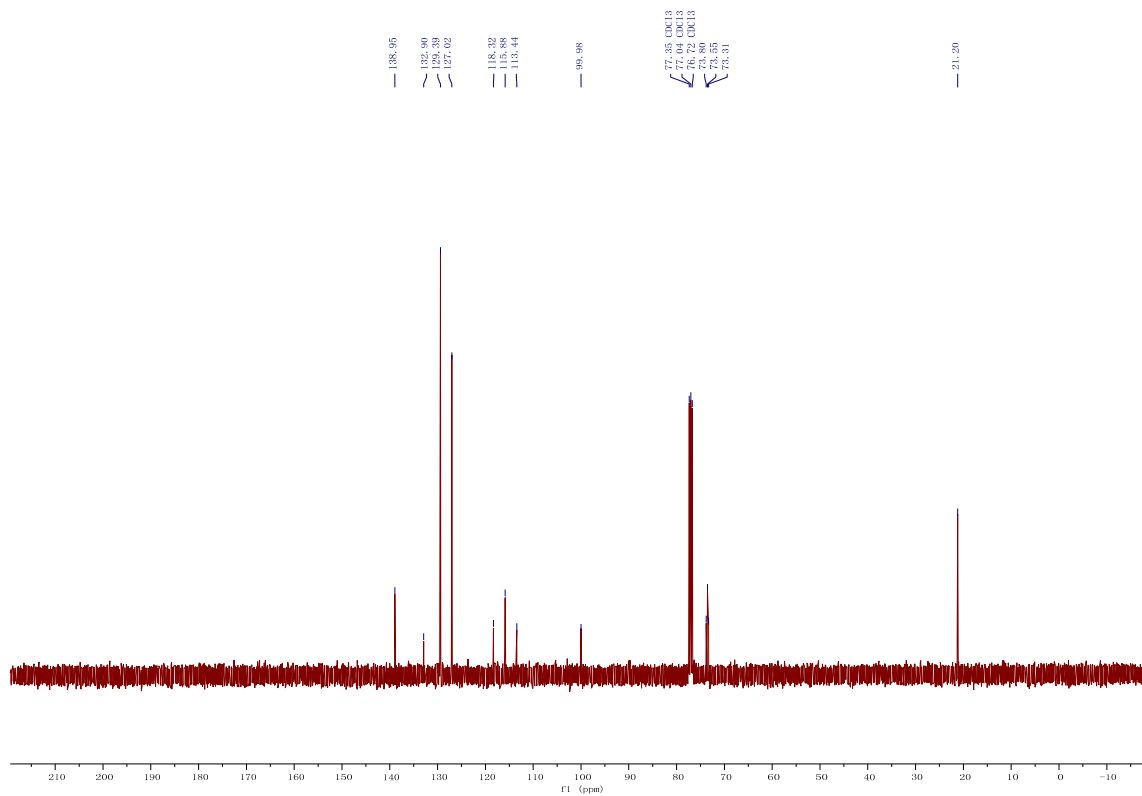

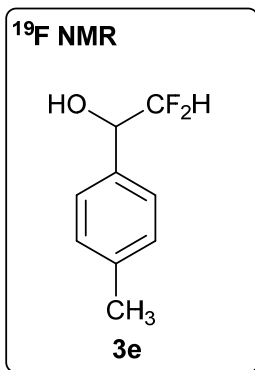

-126.79  
-127.54  
-127.58  
-128.33

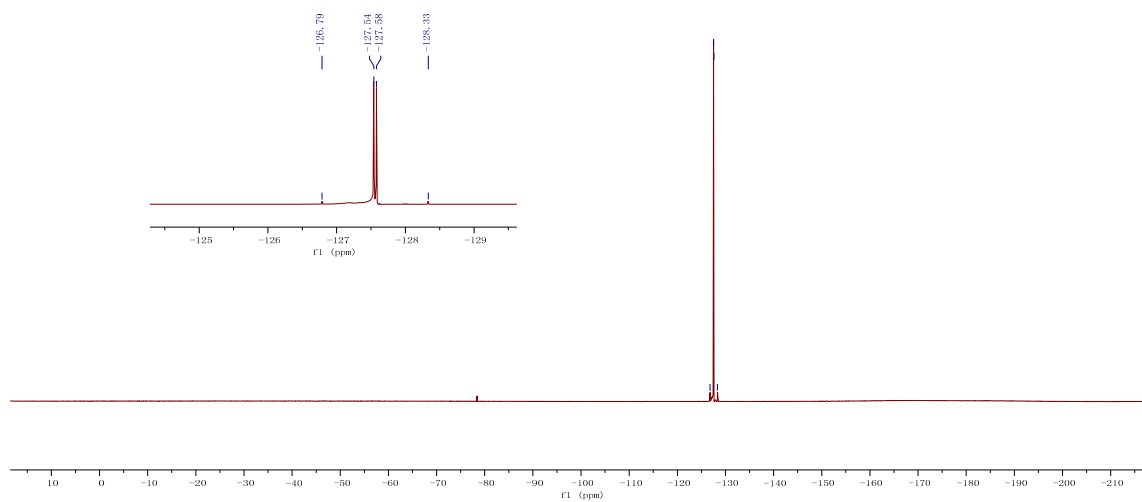





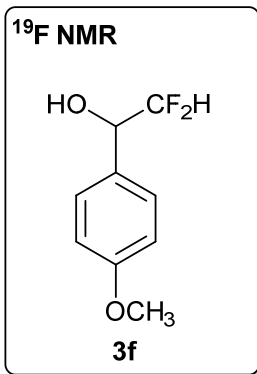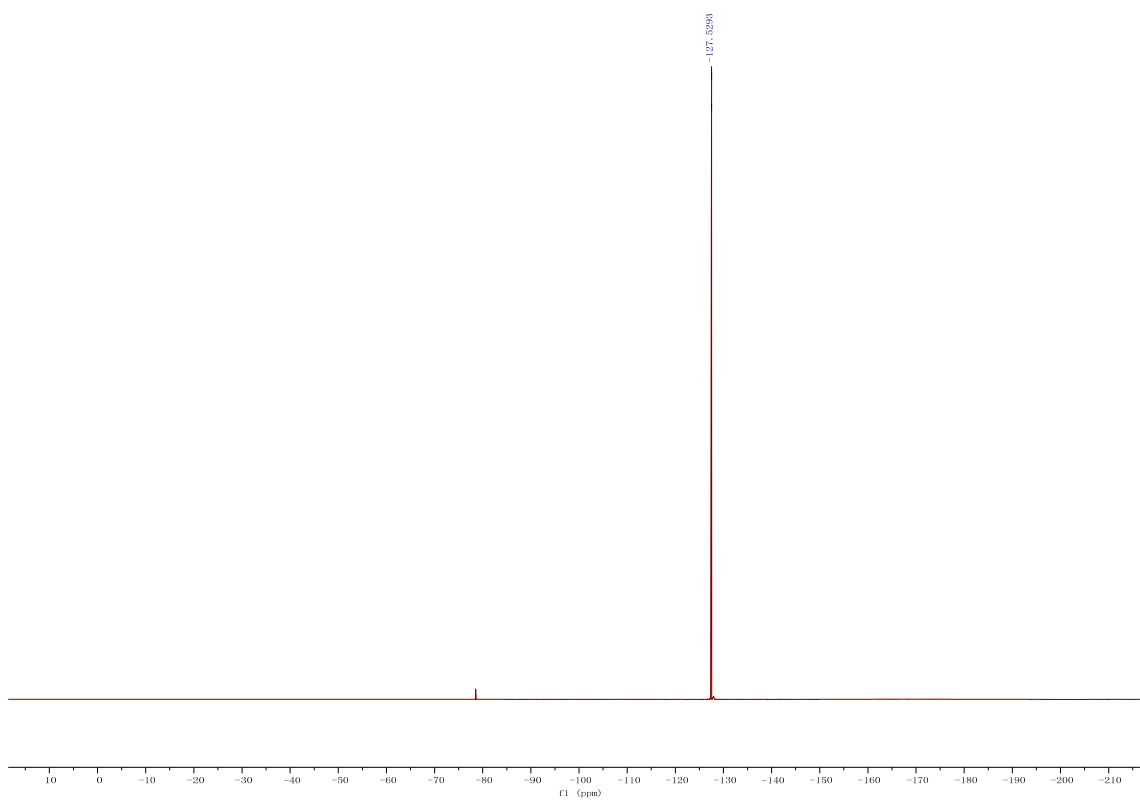

**<sup>1</sup>H NMR**

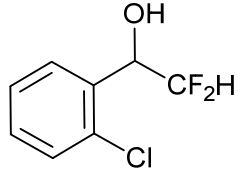

**3g**

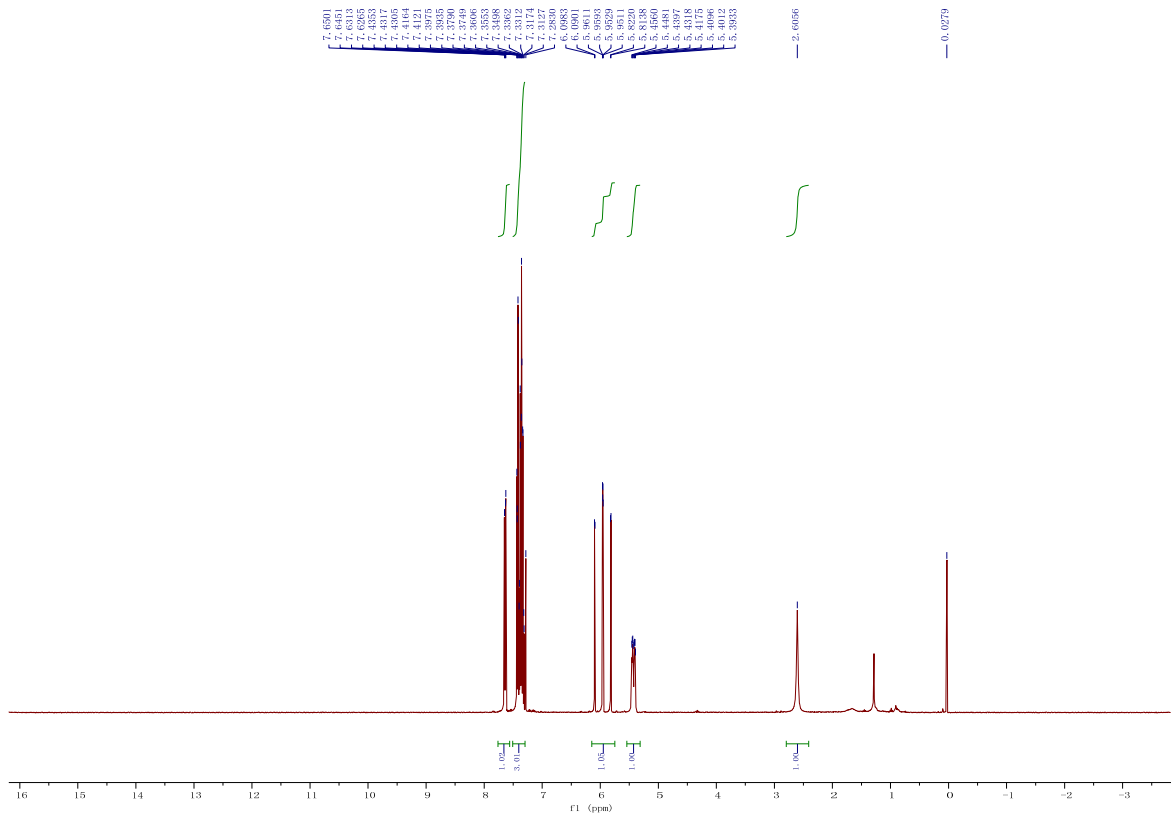

**<sup>13</sup>C NMR**

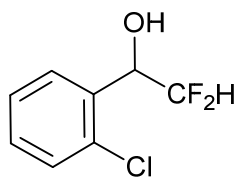

**3g**

133.51  
133.48  
132.80  
132.77  
129.50  
129.58  
129.42  
127.52  
117.14  
117.11  
112.26

77.35 CDCl3  
77.05 CDCl3  
76.74 CDCl3  
76.65  
76.05  
69.81

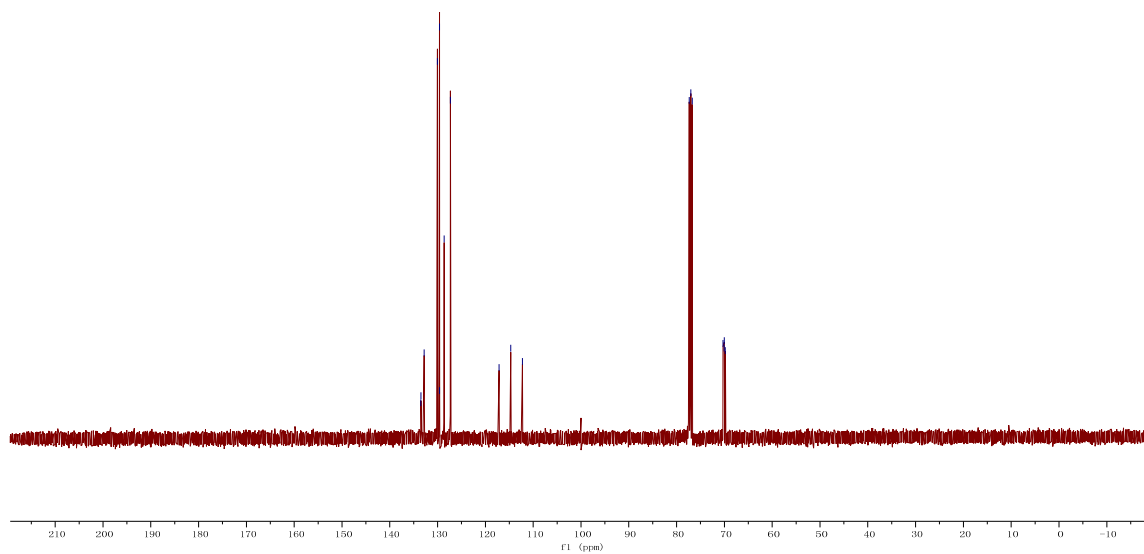

**<sup>19</sup>F NMR**

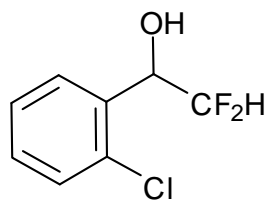

**3g**

126.4284  
127.1736  
131.7425  
132.4897

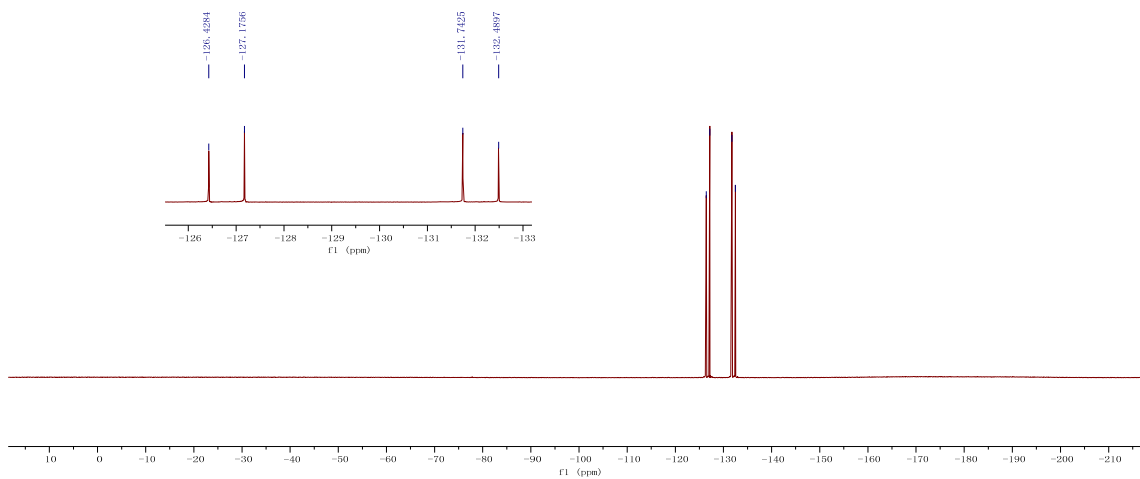



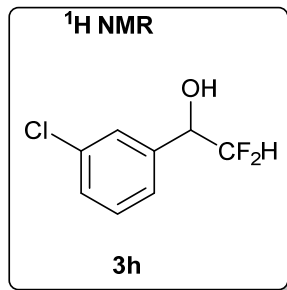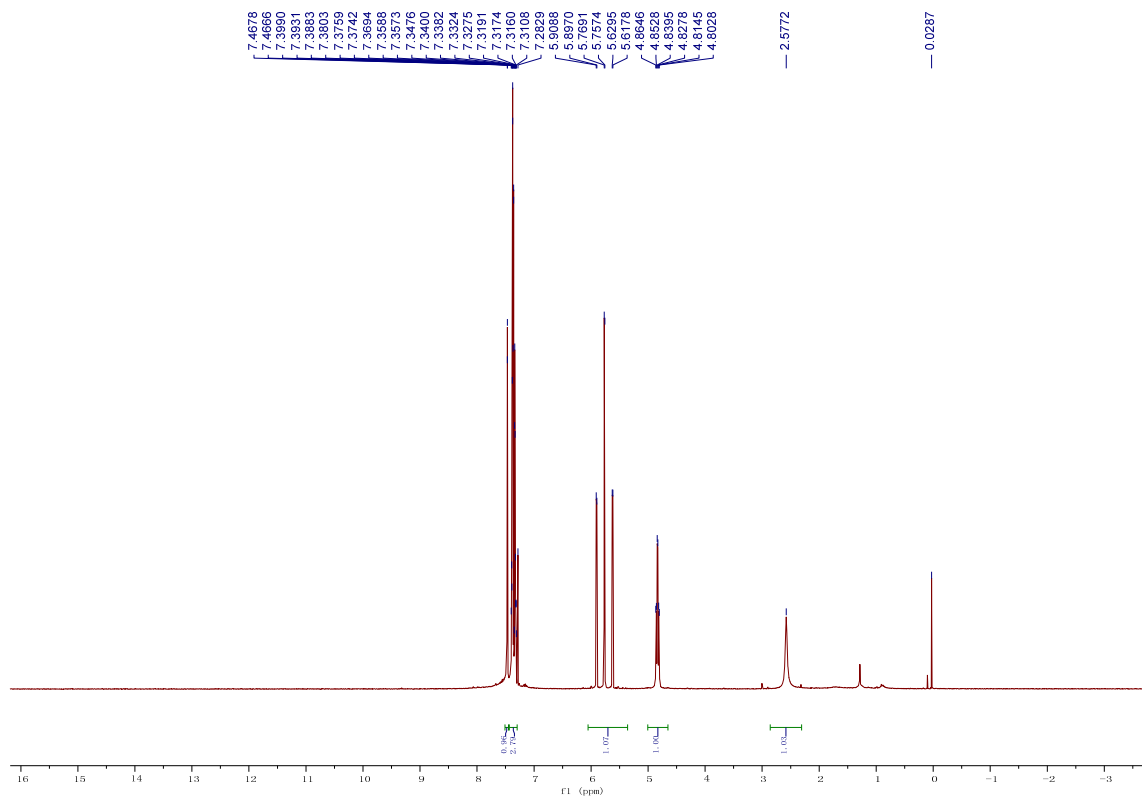

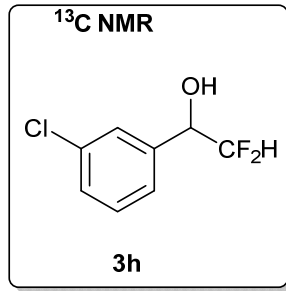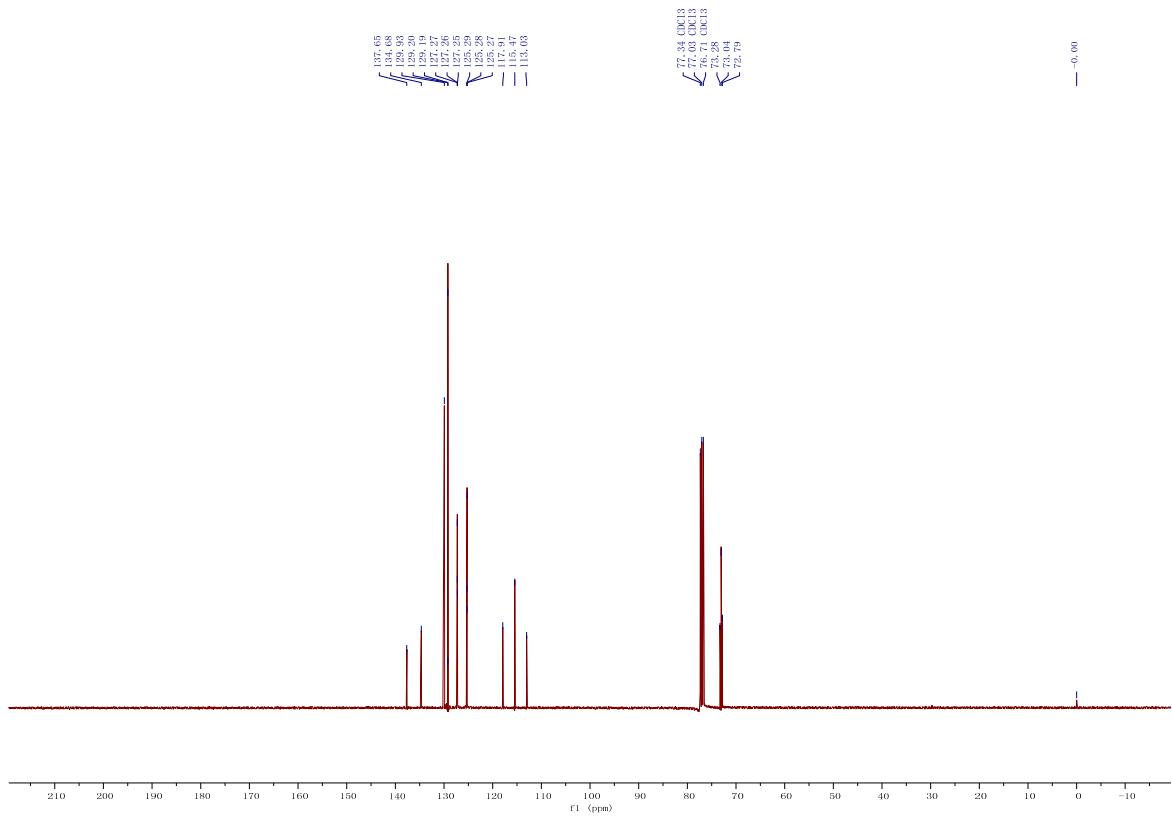

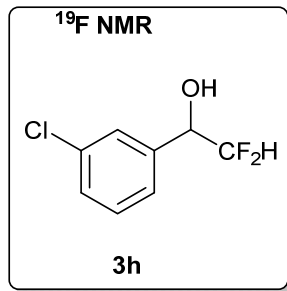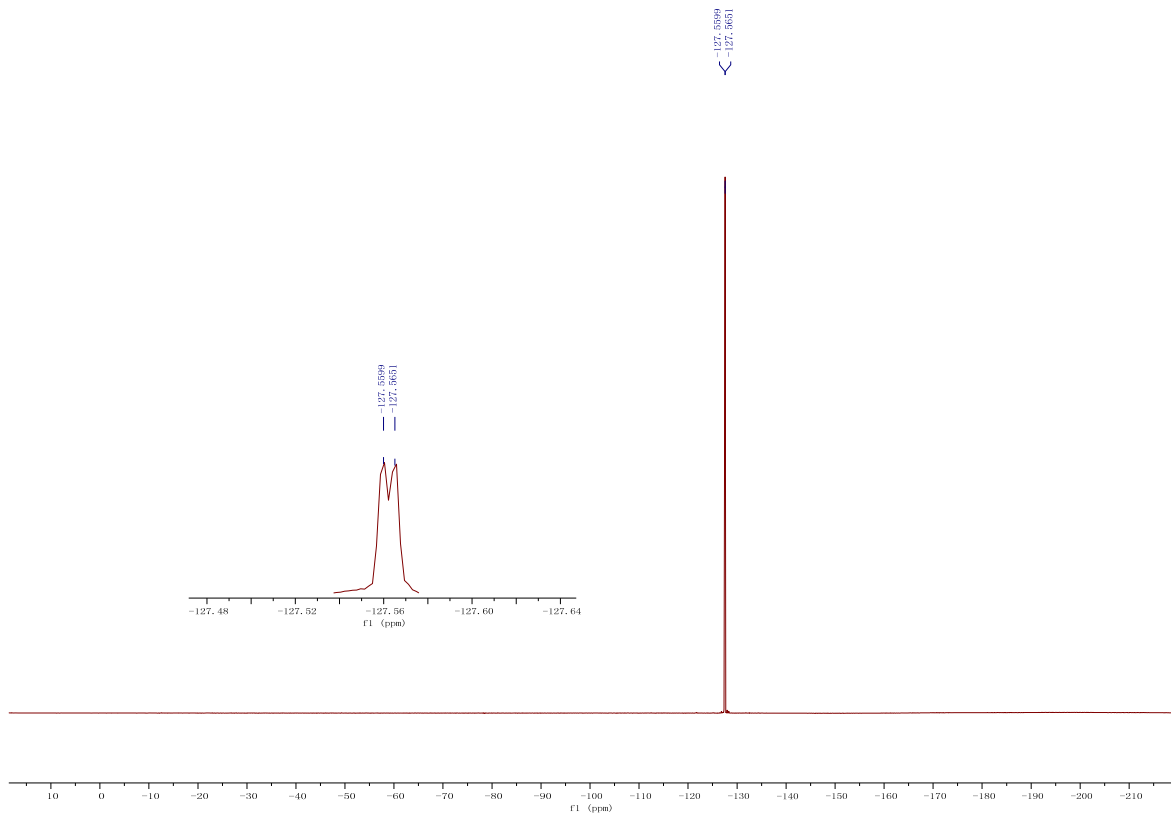

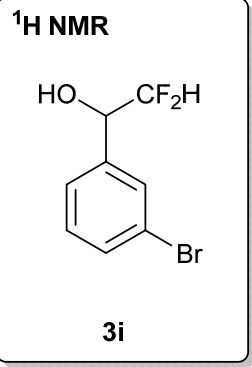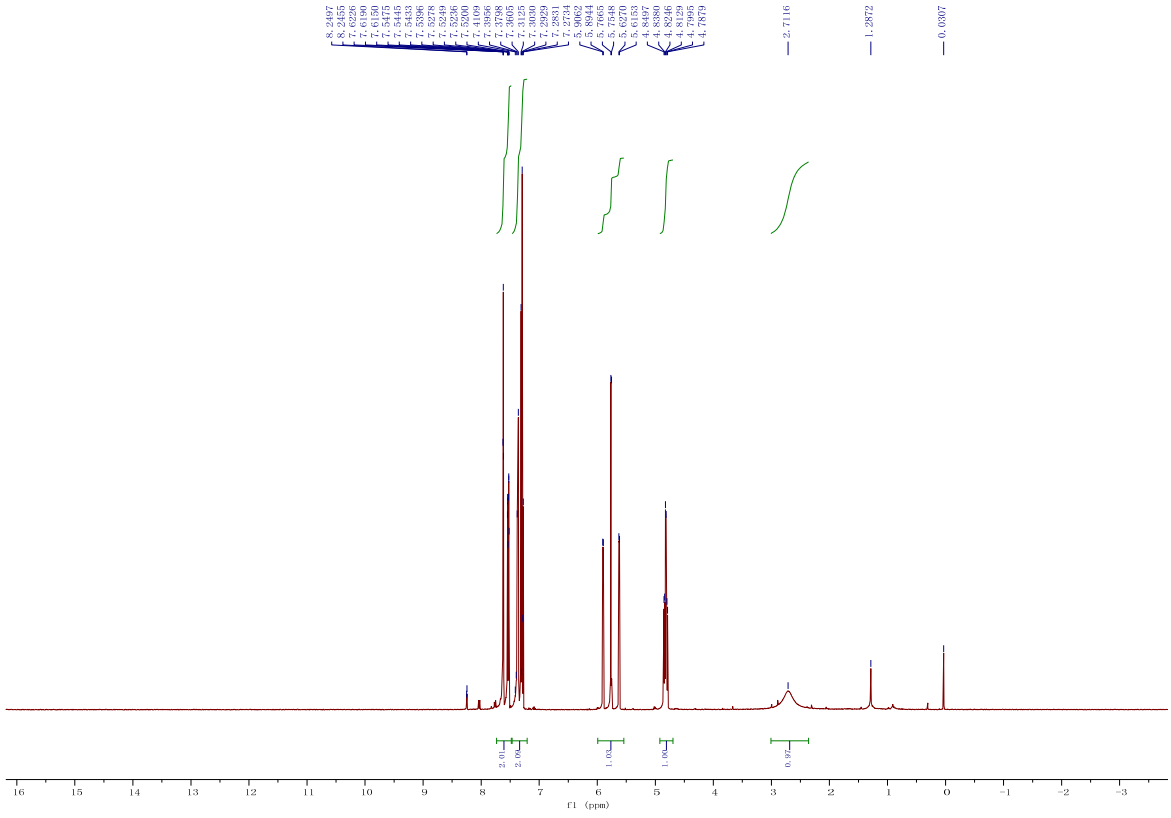

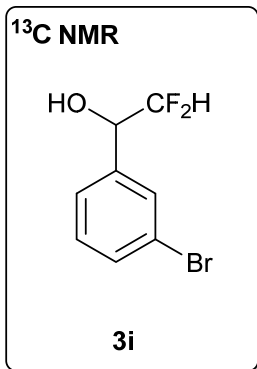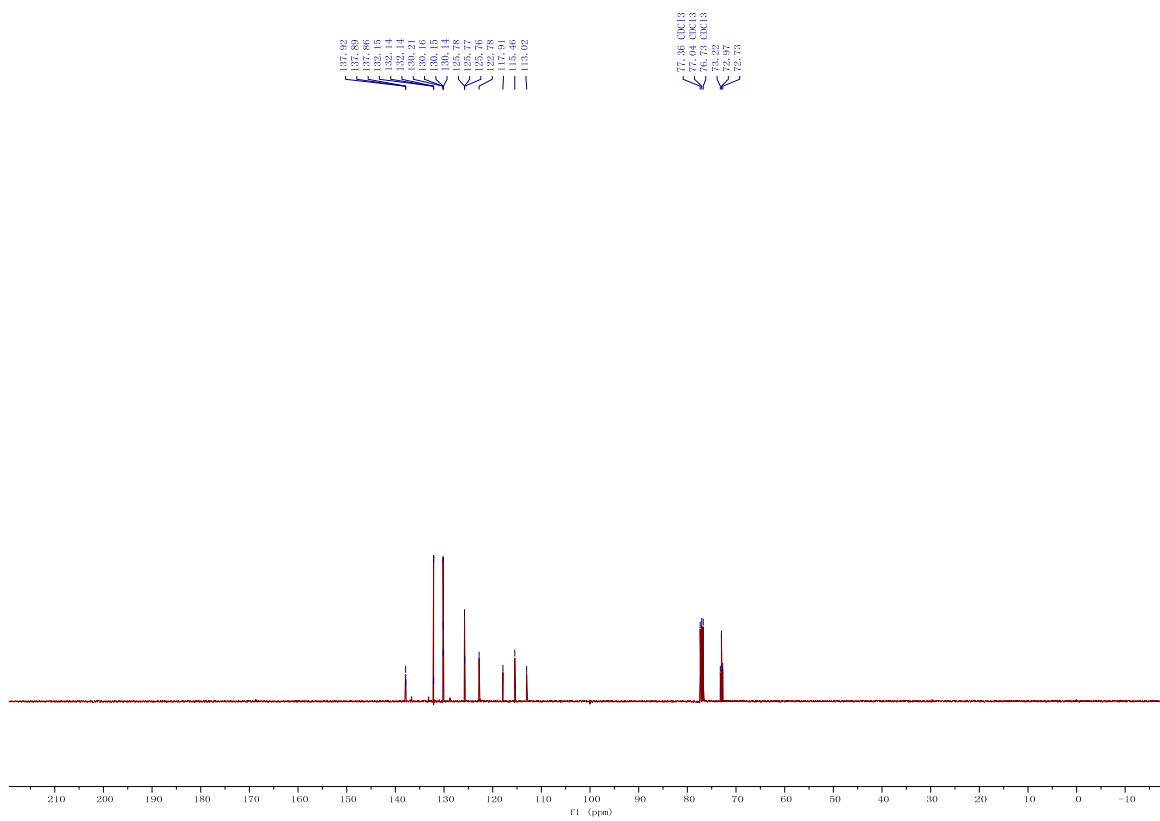

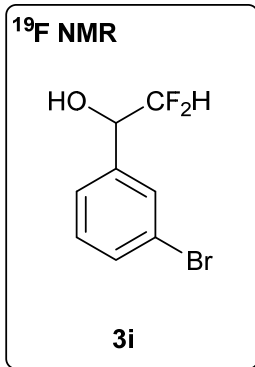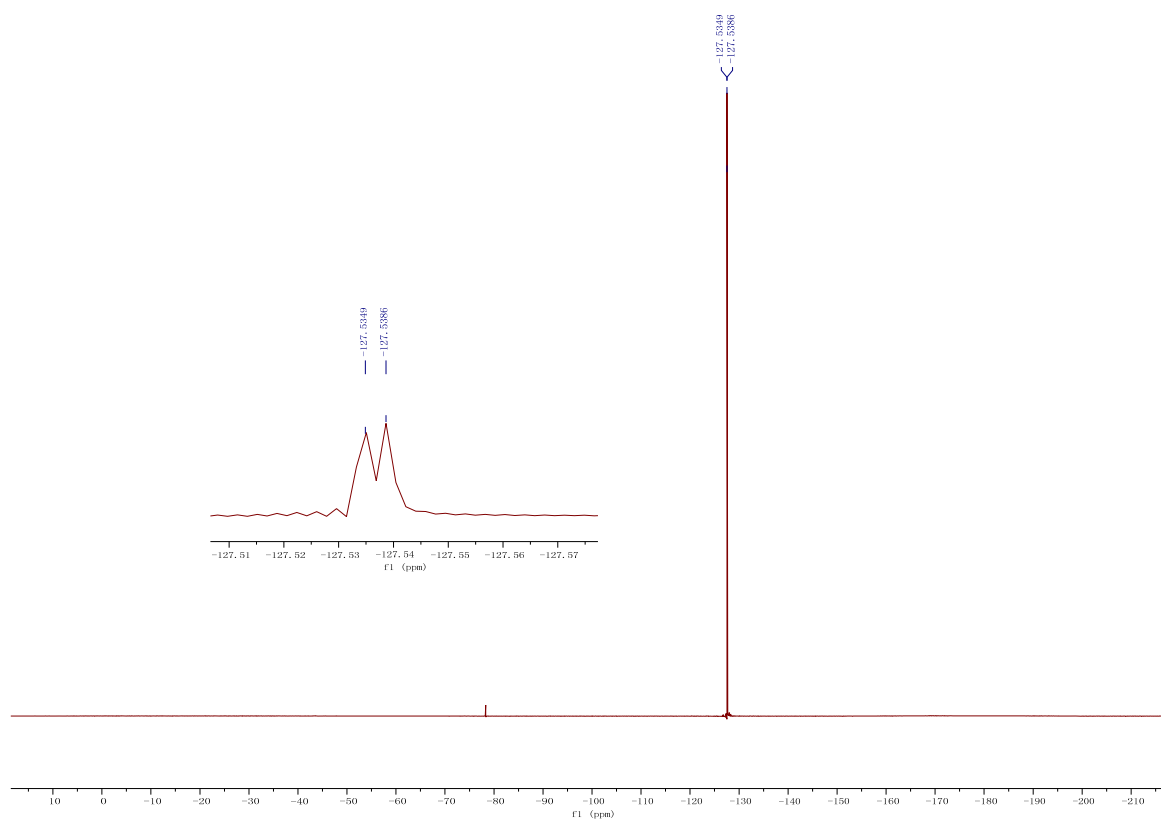

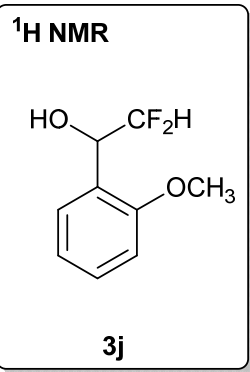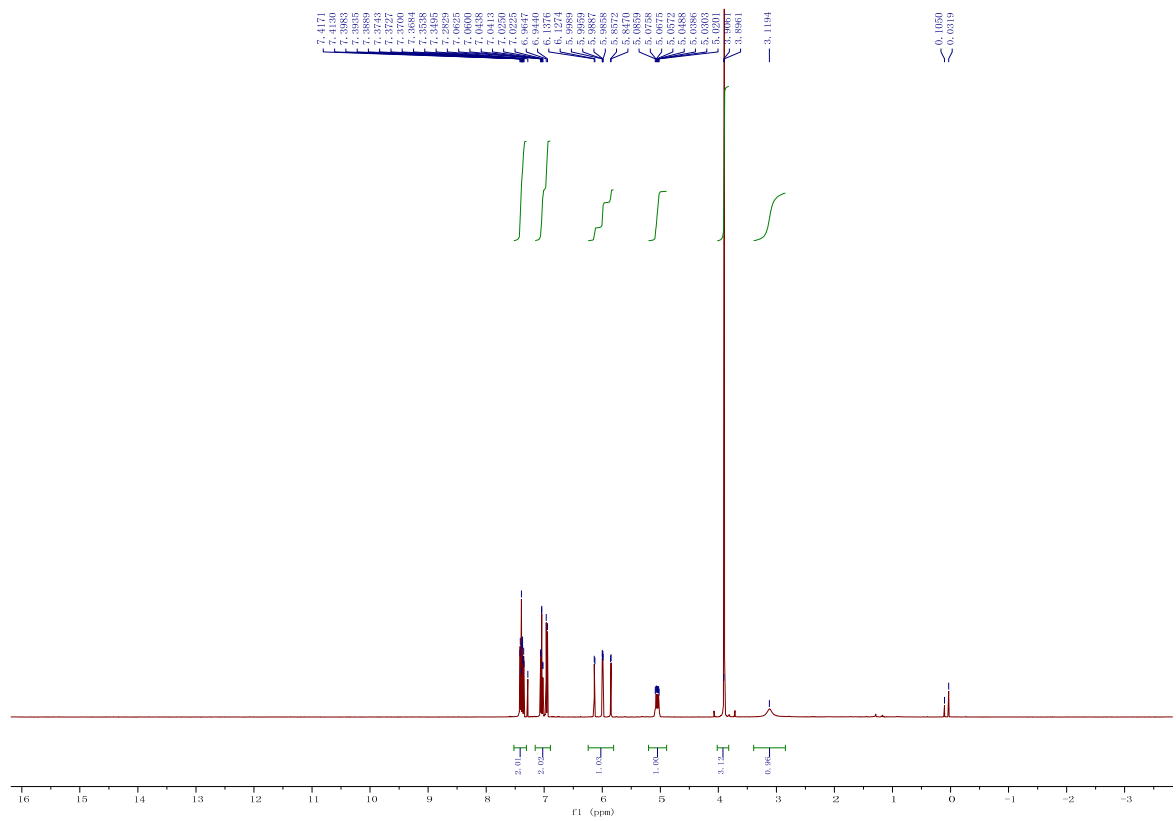

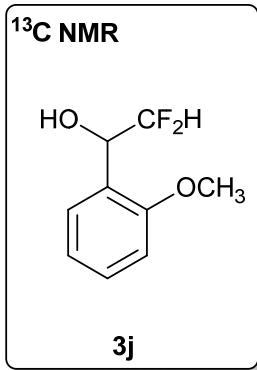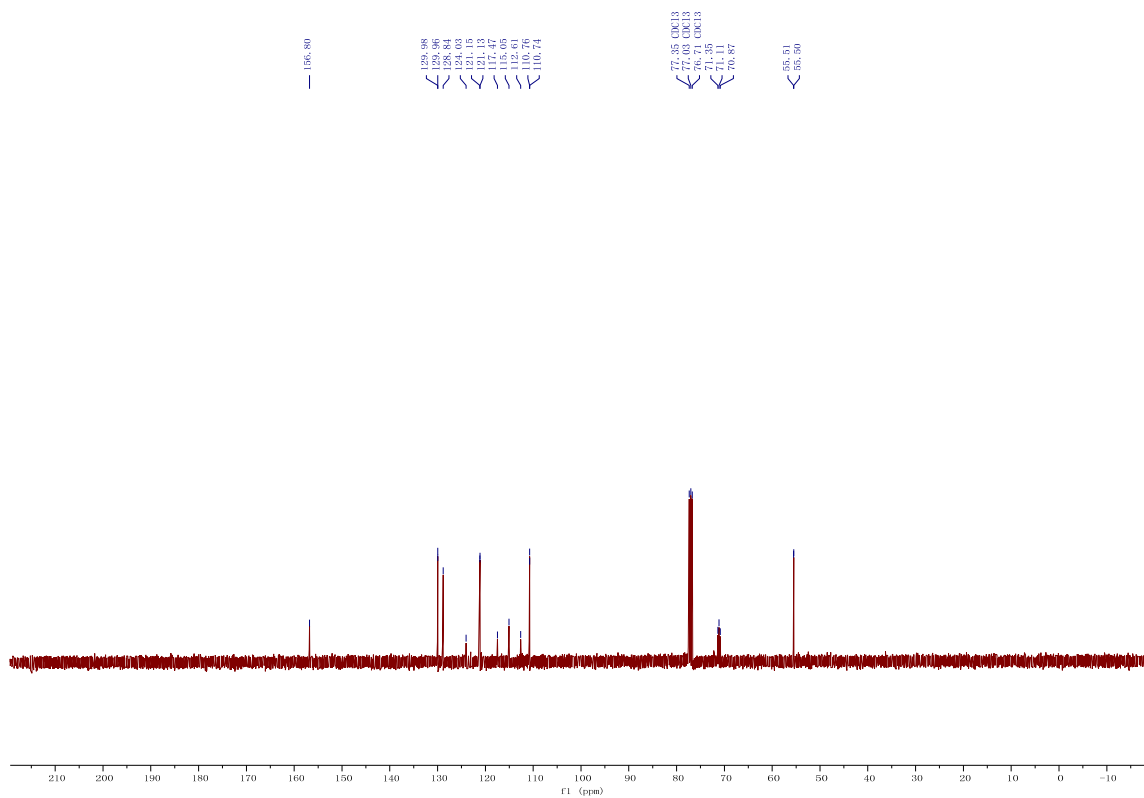



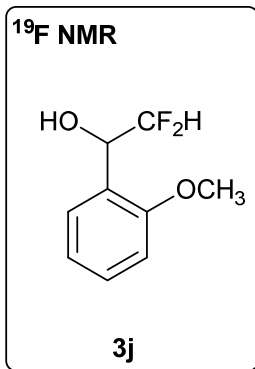

-125.2370  
-125.8836  
-129.8694  
-130.6161

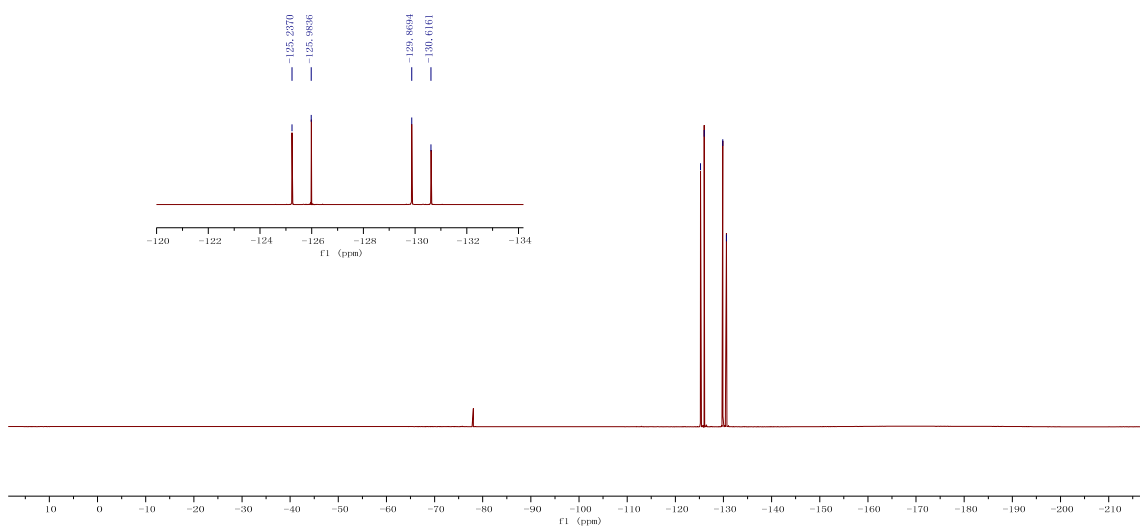

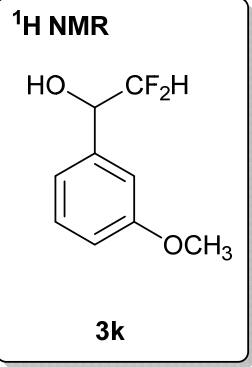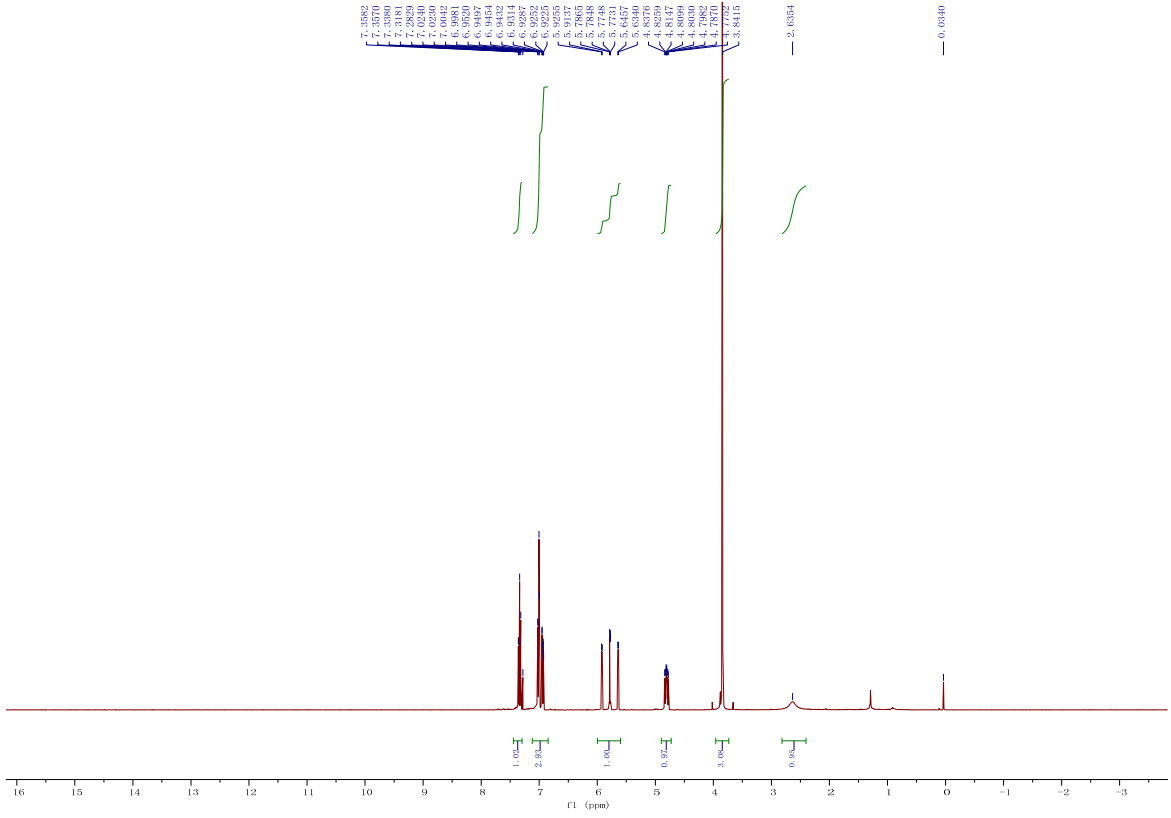

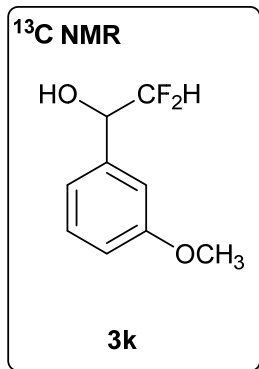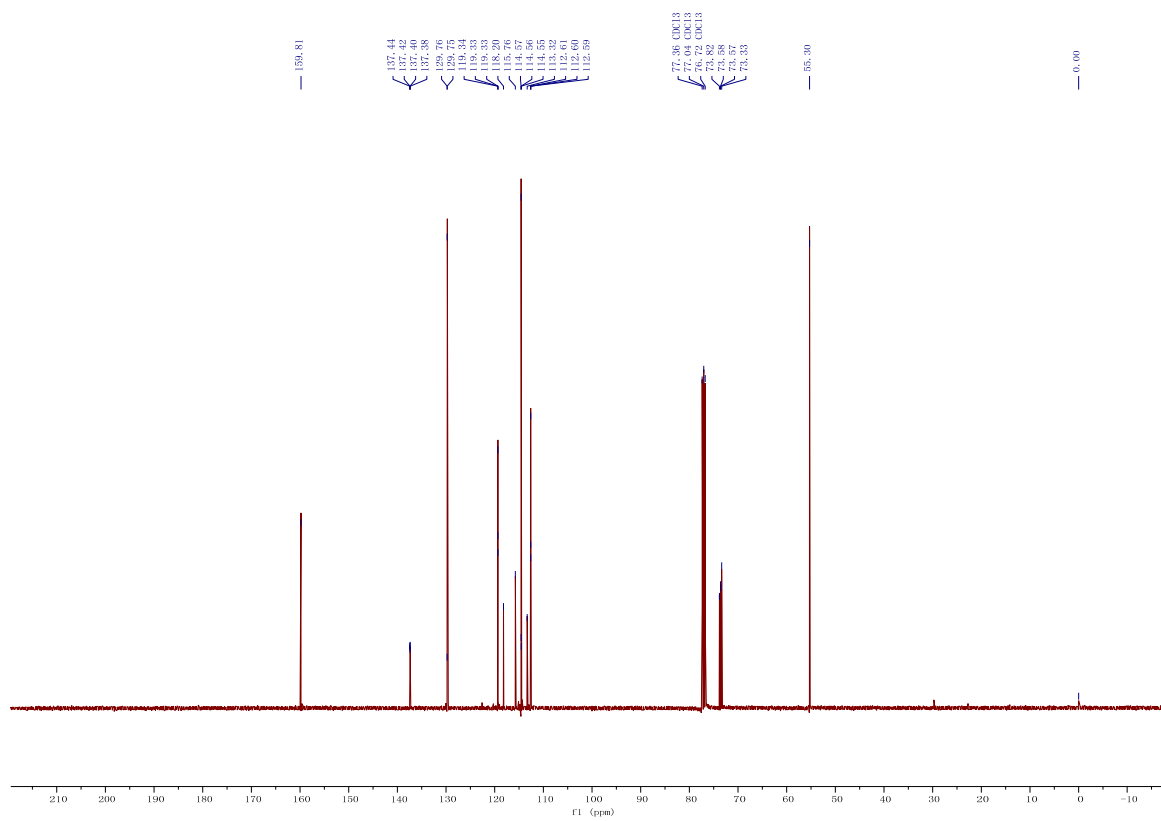

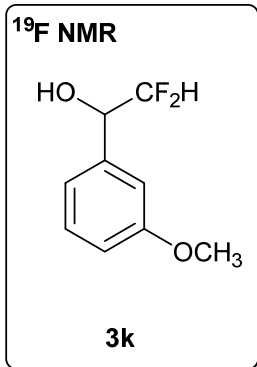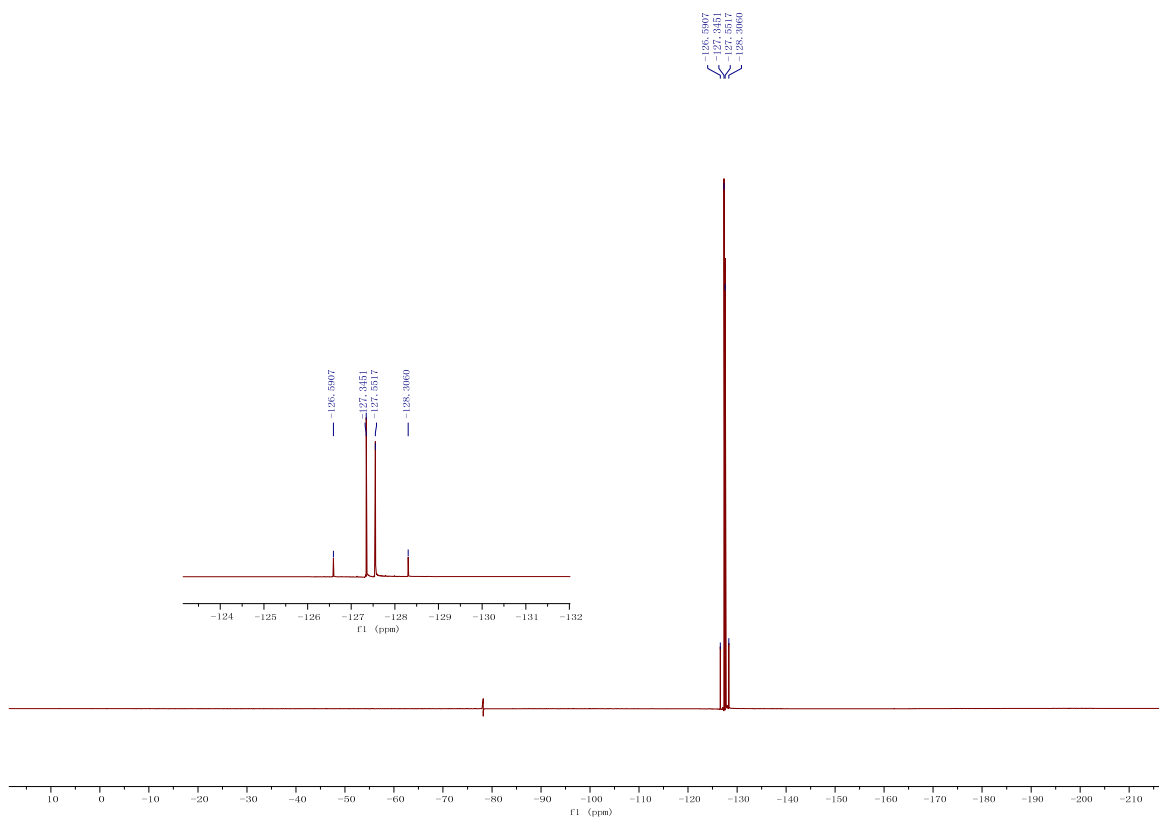

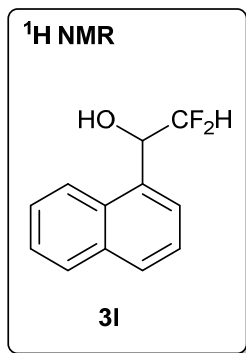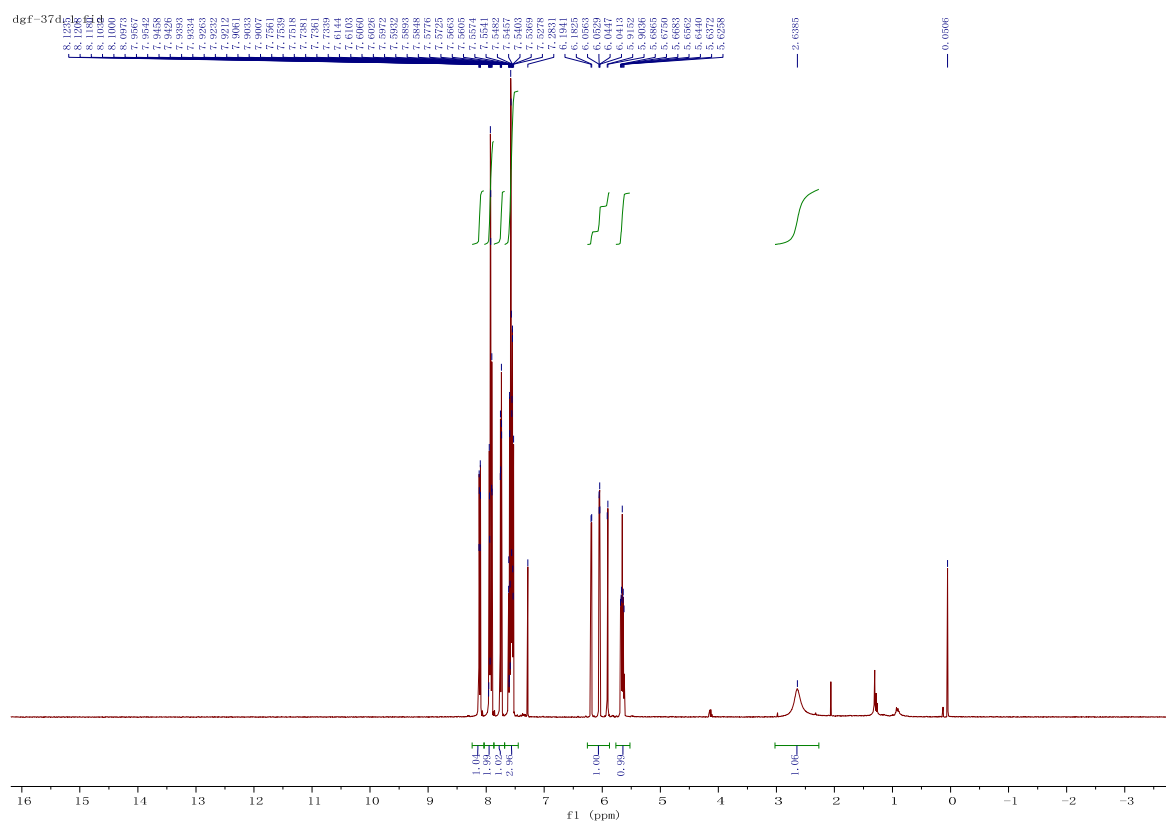

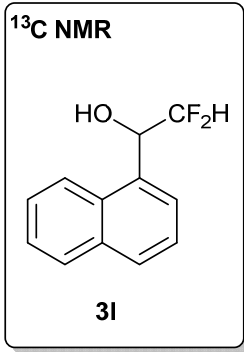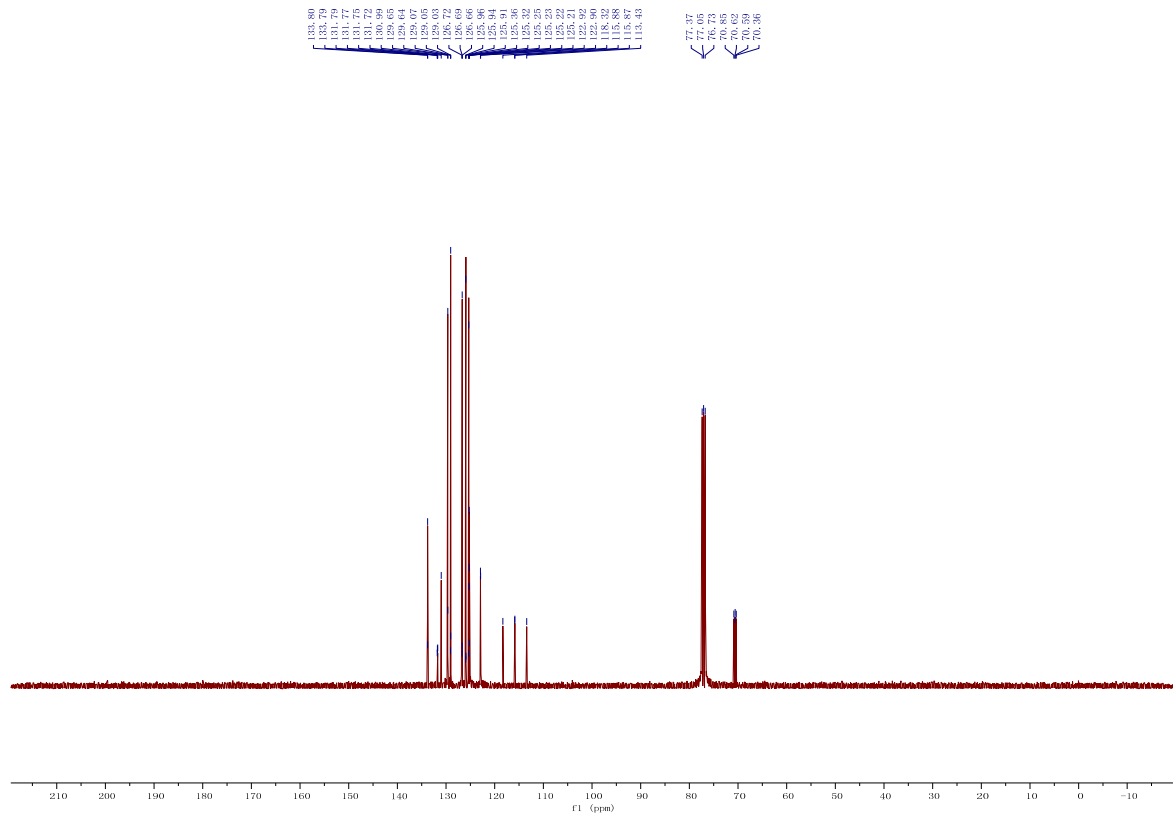

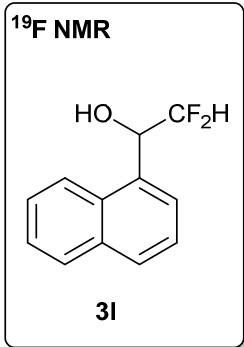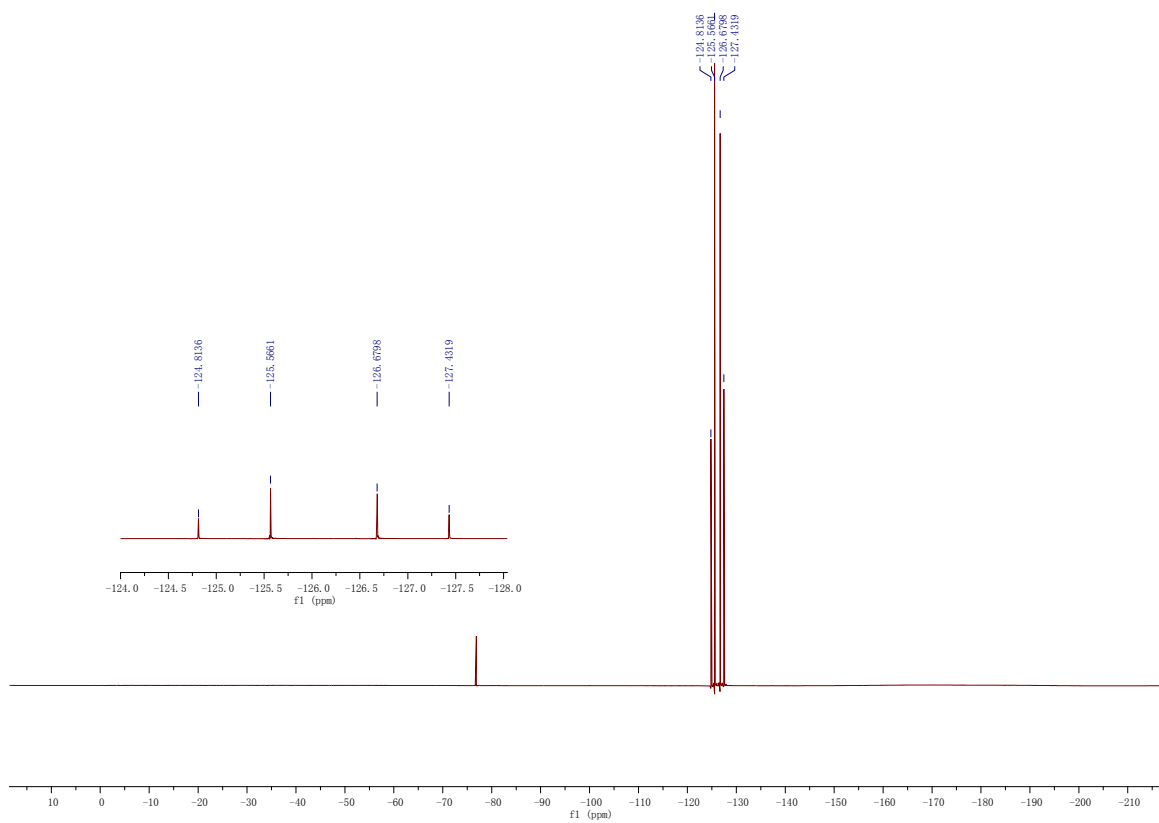

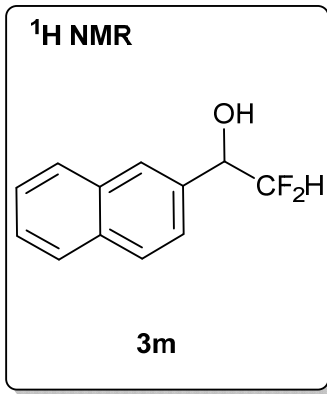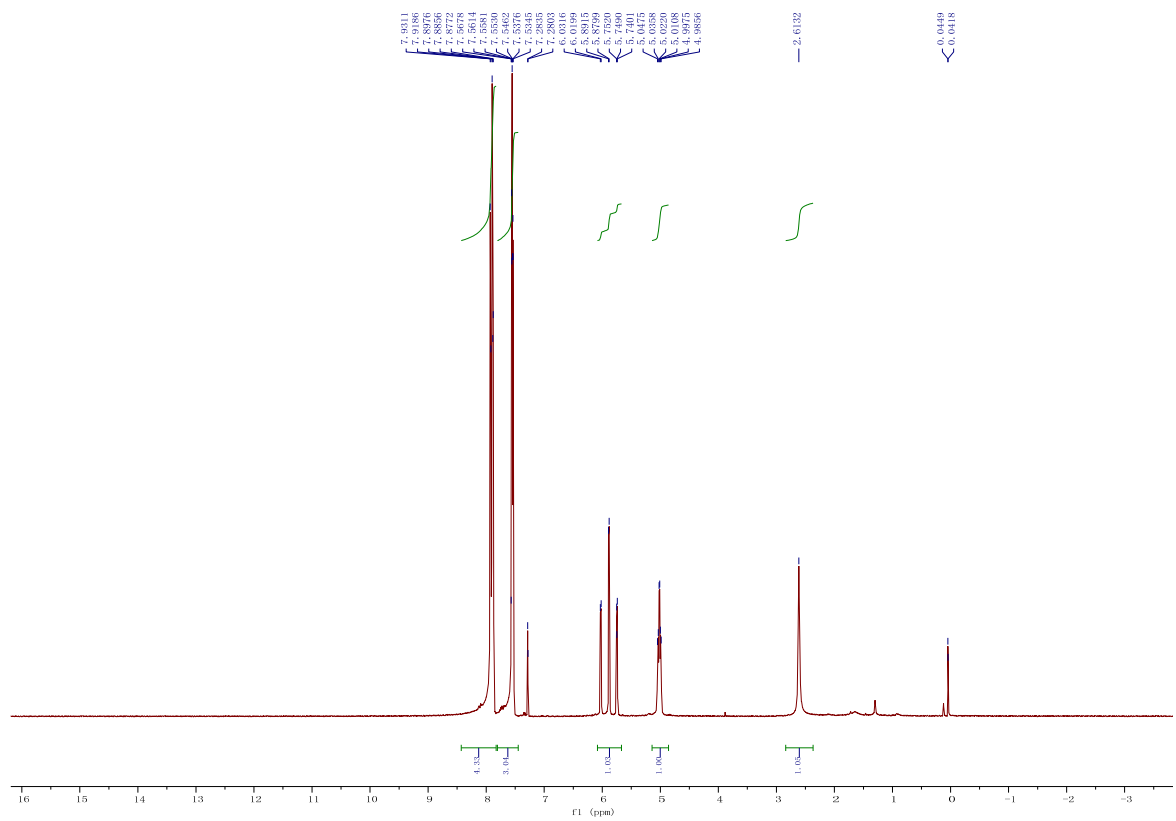



**<sup>13</sup>C NMR**

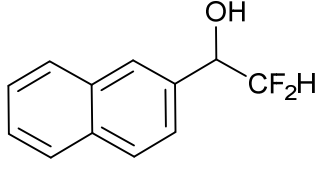

**3m**

- 133.56
- 133.53
- 133.50
- 133.16
- 133.09
- 128.15
- 127.77
- 126.61
- 126.50
- 124.32
- 115.88
- 115.44
- 77.36 CDCl<sub>3</sub>
- 77.04 CDCl<sub>3</sub>
- 76.72 CDCl<sub>3</sub>
- 73.84
- 73.83
- 73.59

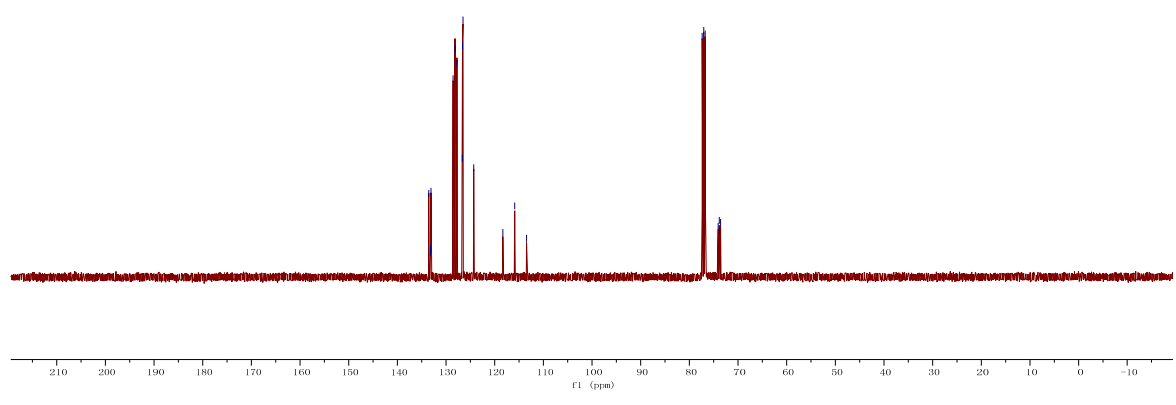

**<sup>19</sup>F NMR**

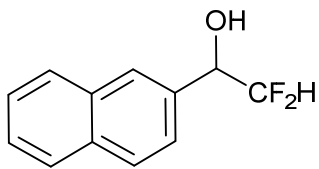

**3m**

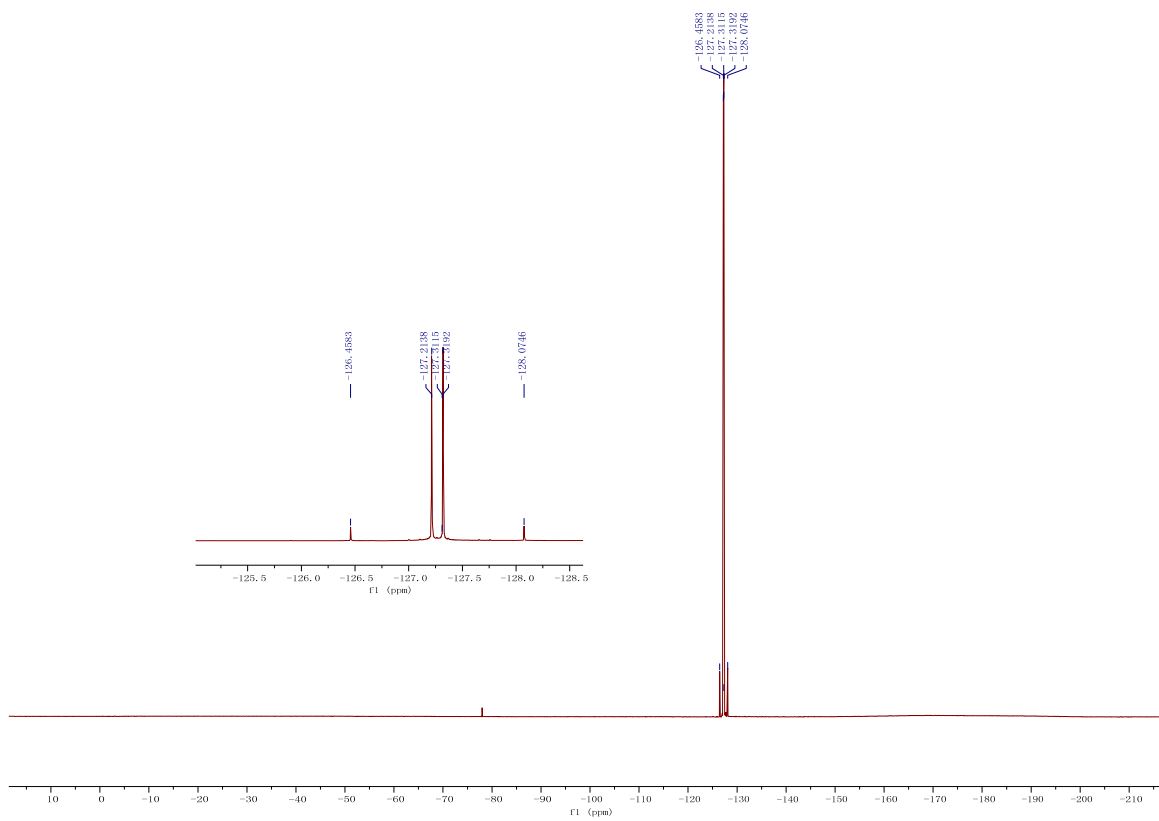

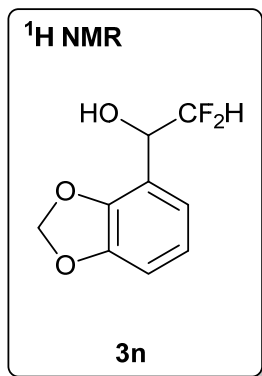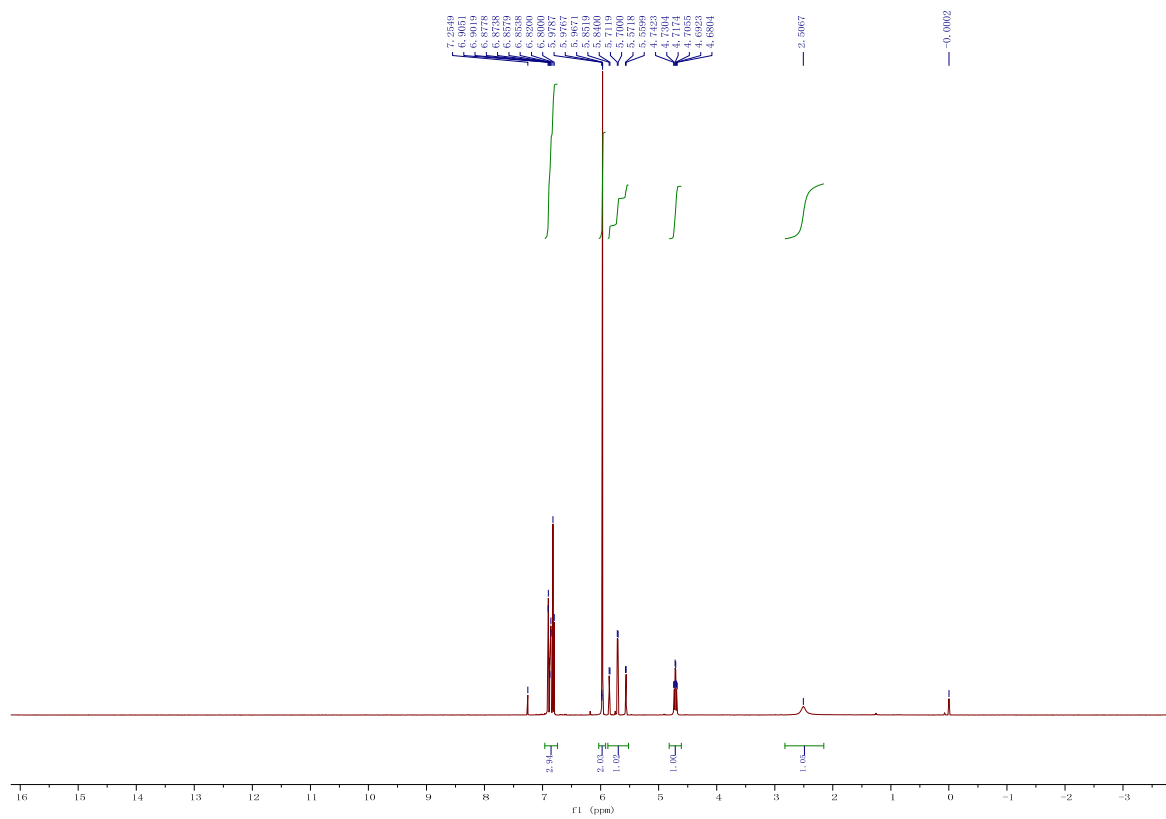



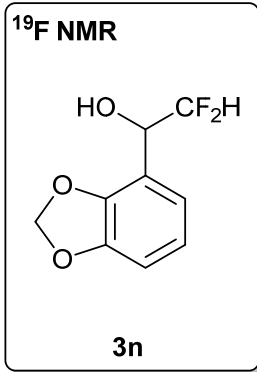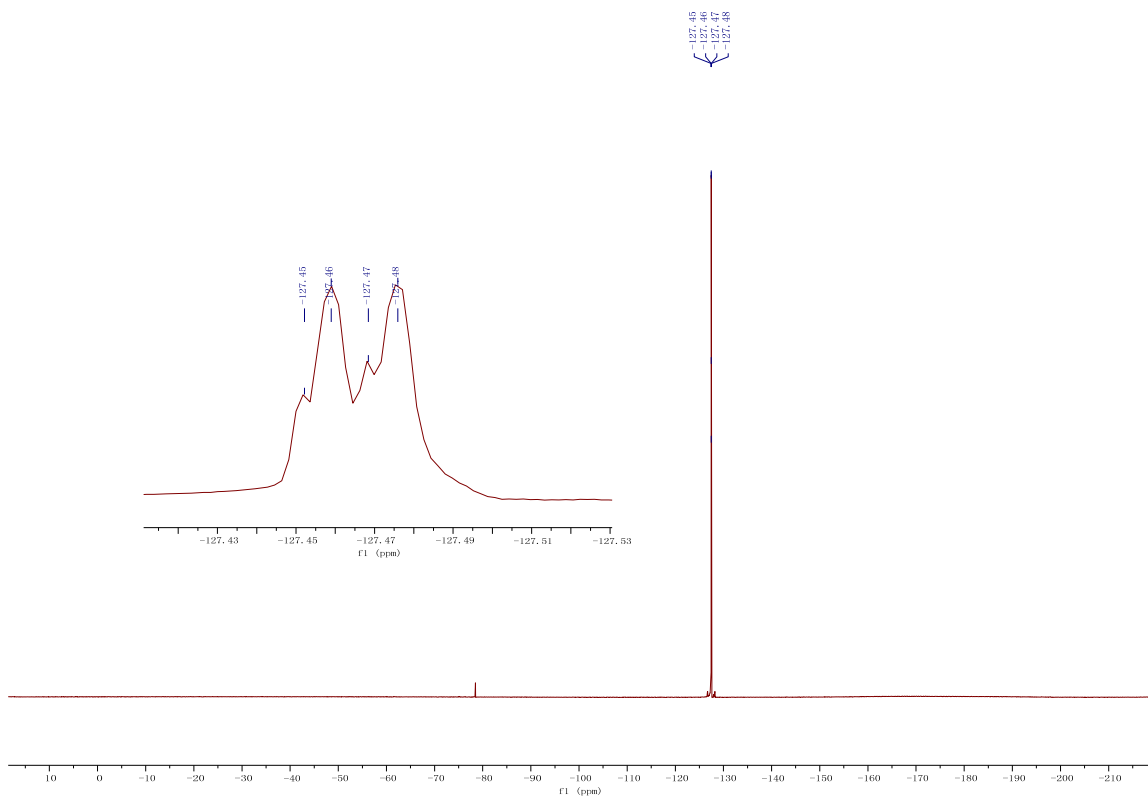

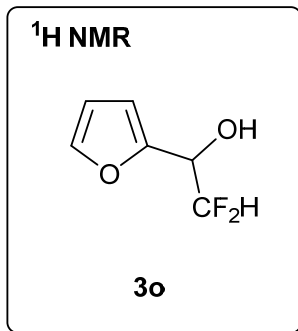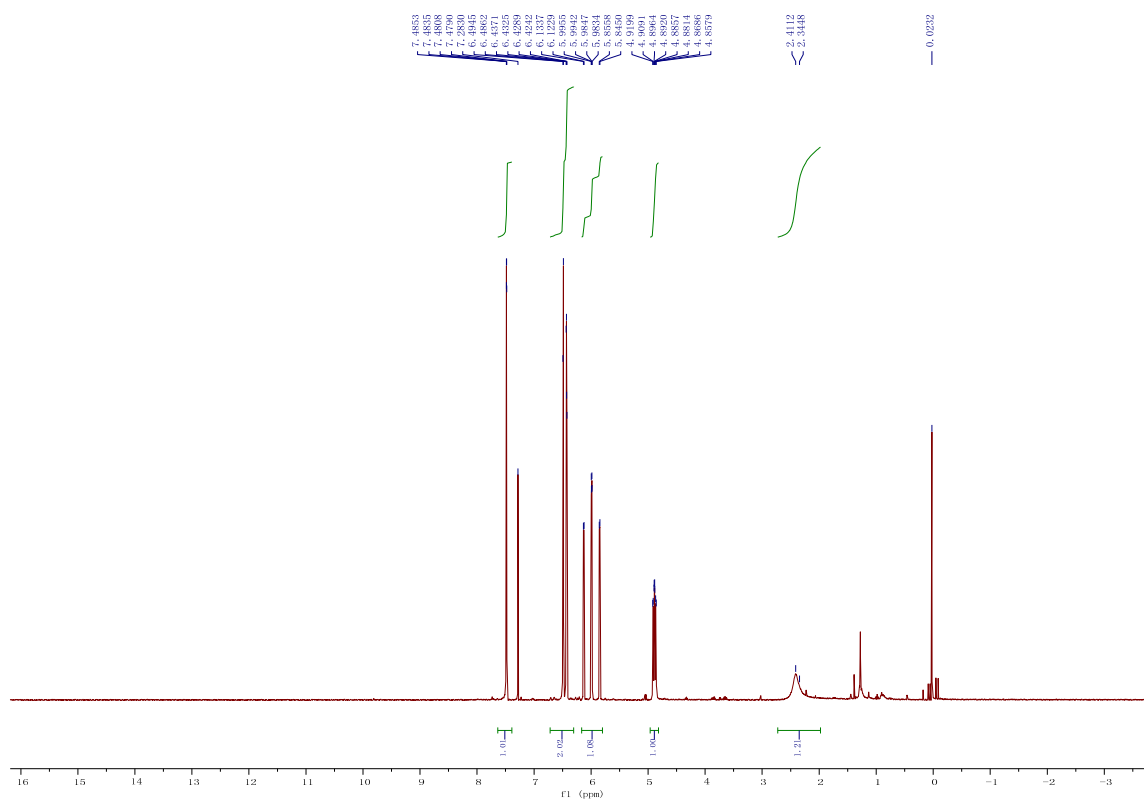

**<sup>13</sup>C NMR**

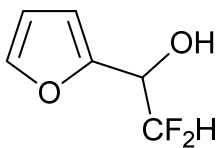

**3o**

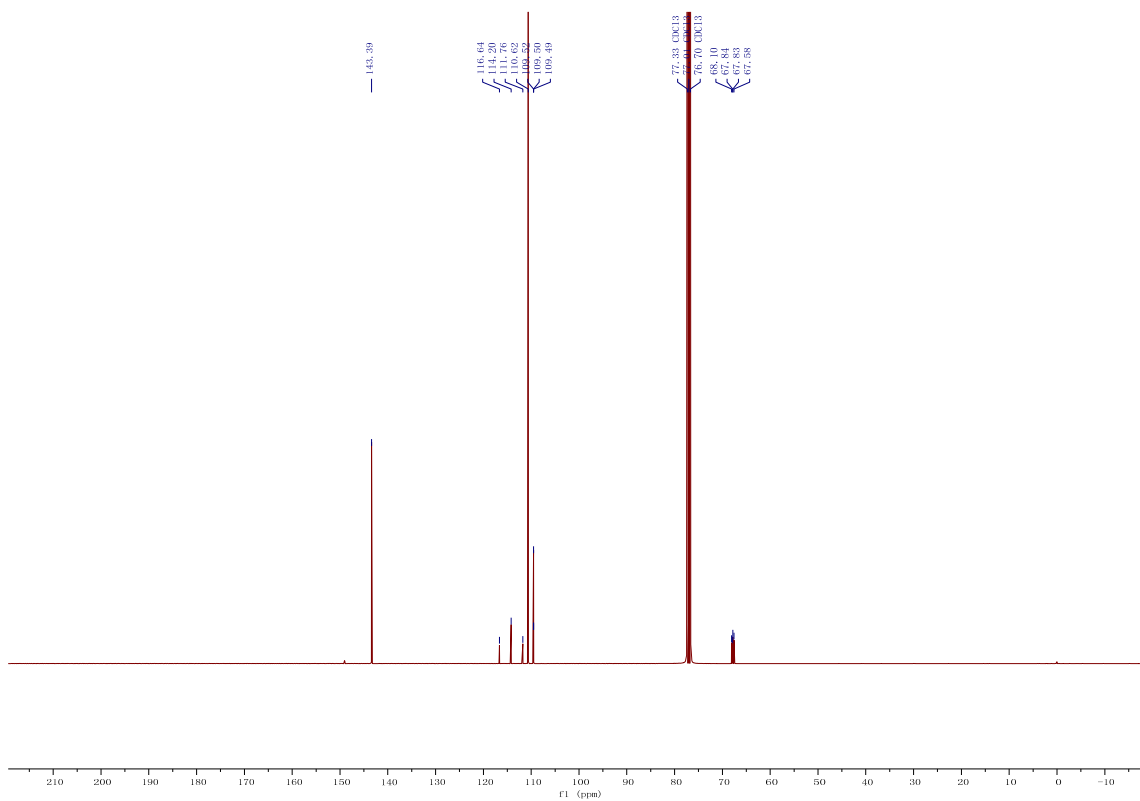

**<sup>19</sup>F NMR**

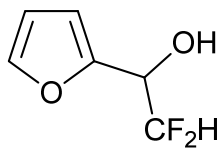

**3o**

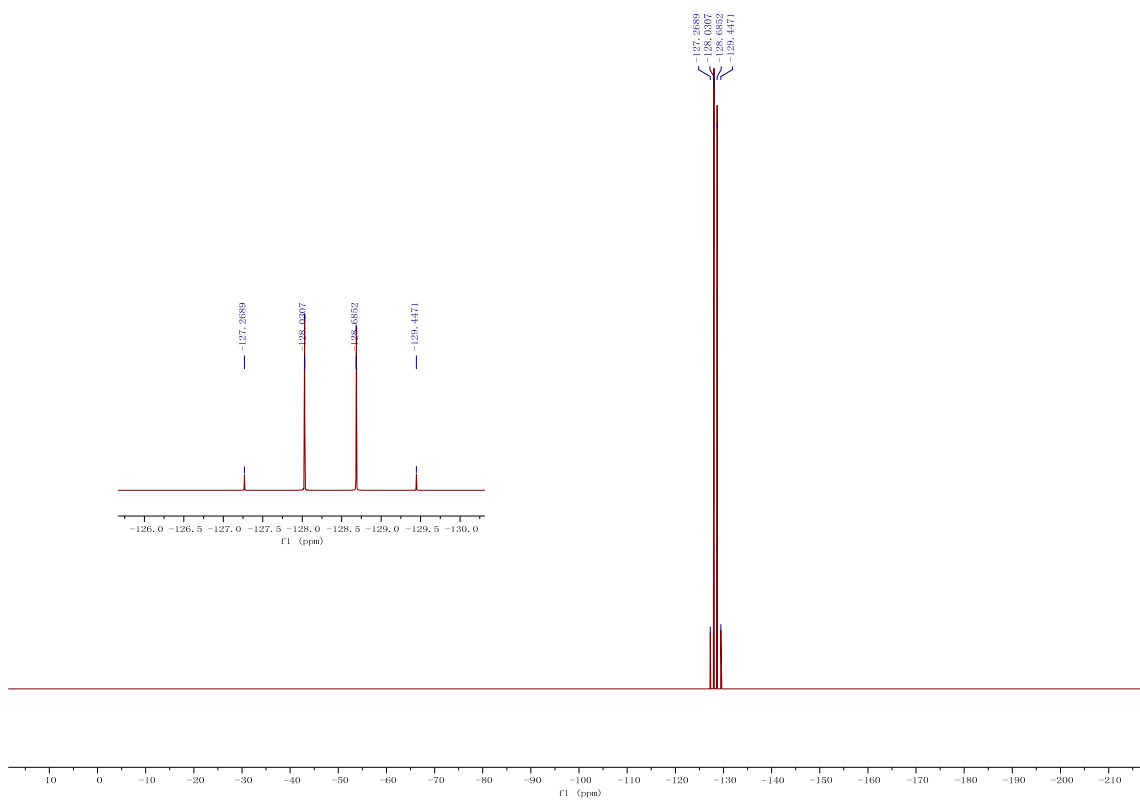



**<sup>1</sup>H NMR**

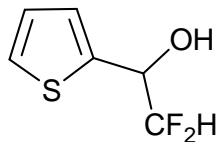

**3p**

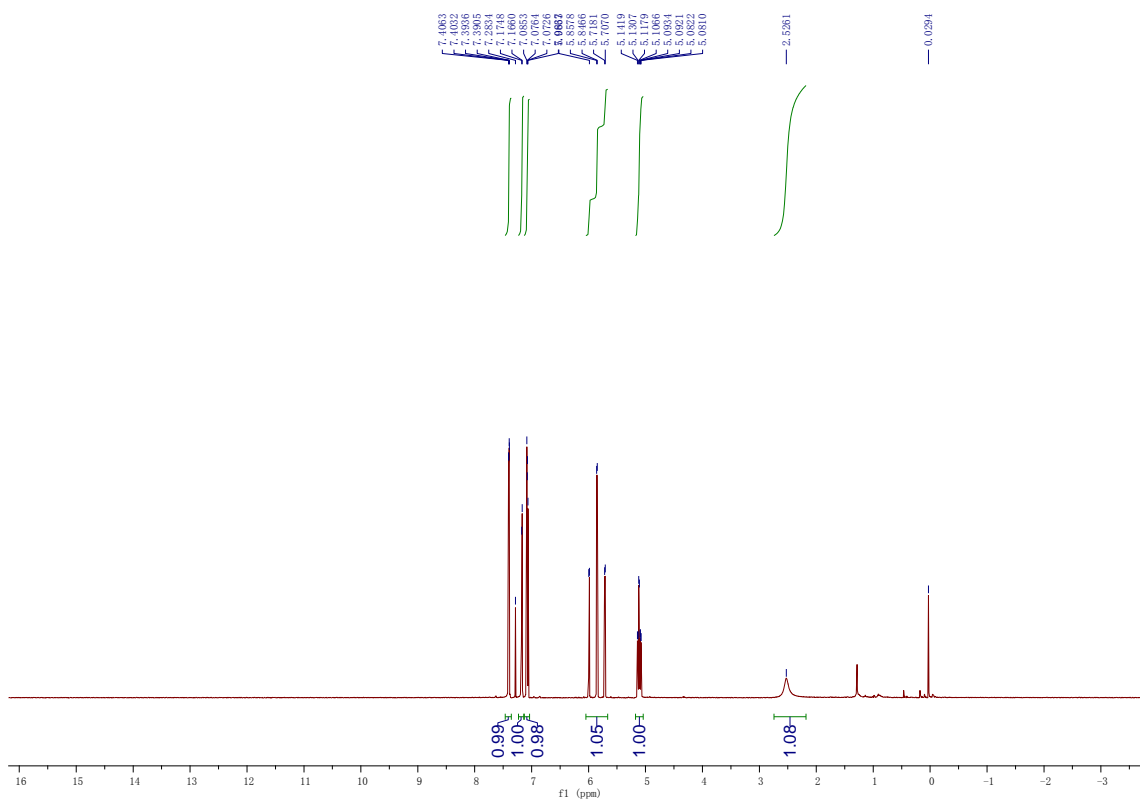

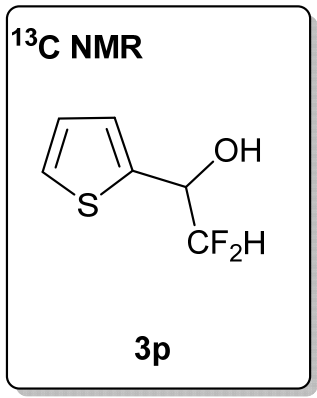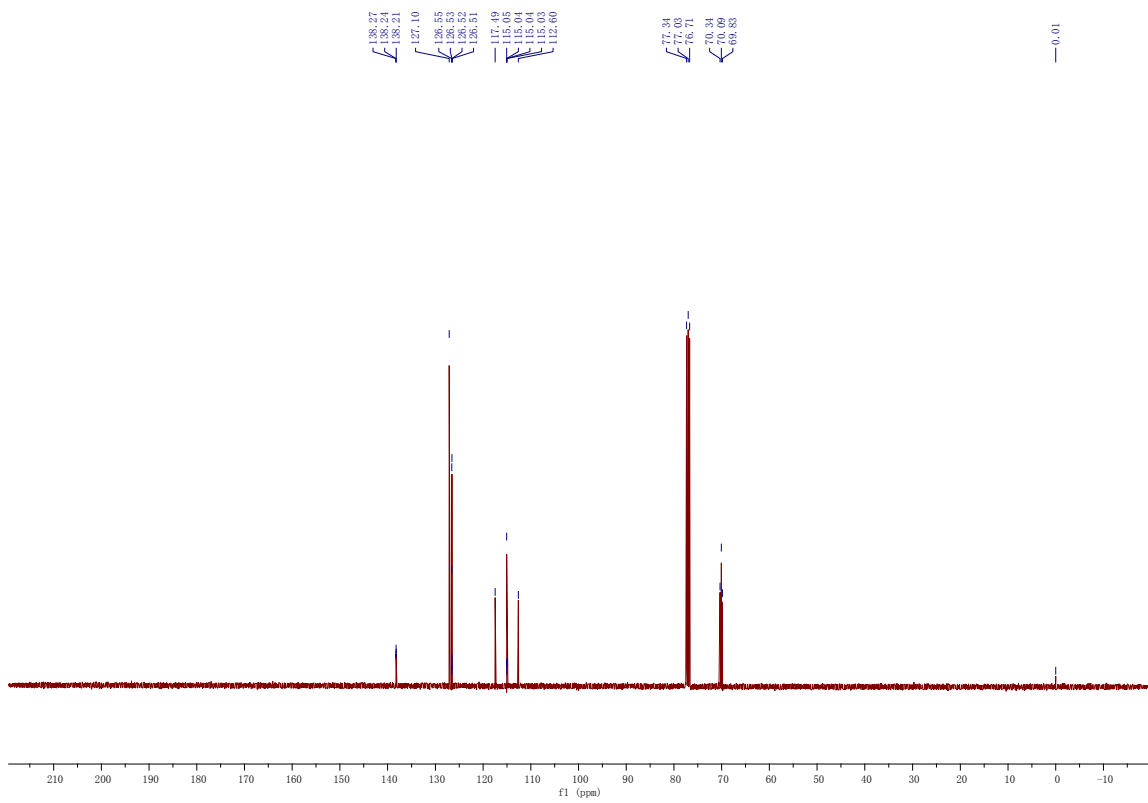

**<sup>19</sup>F NMR**

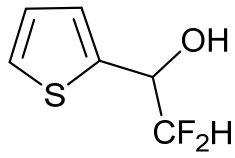

**3p**

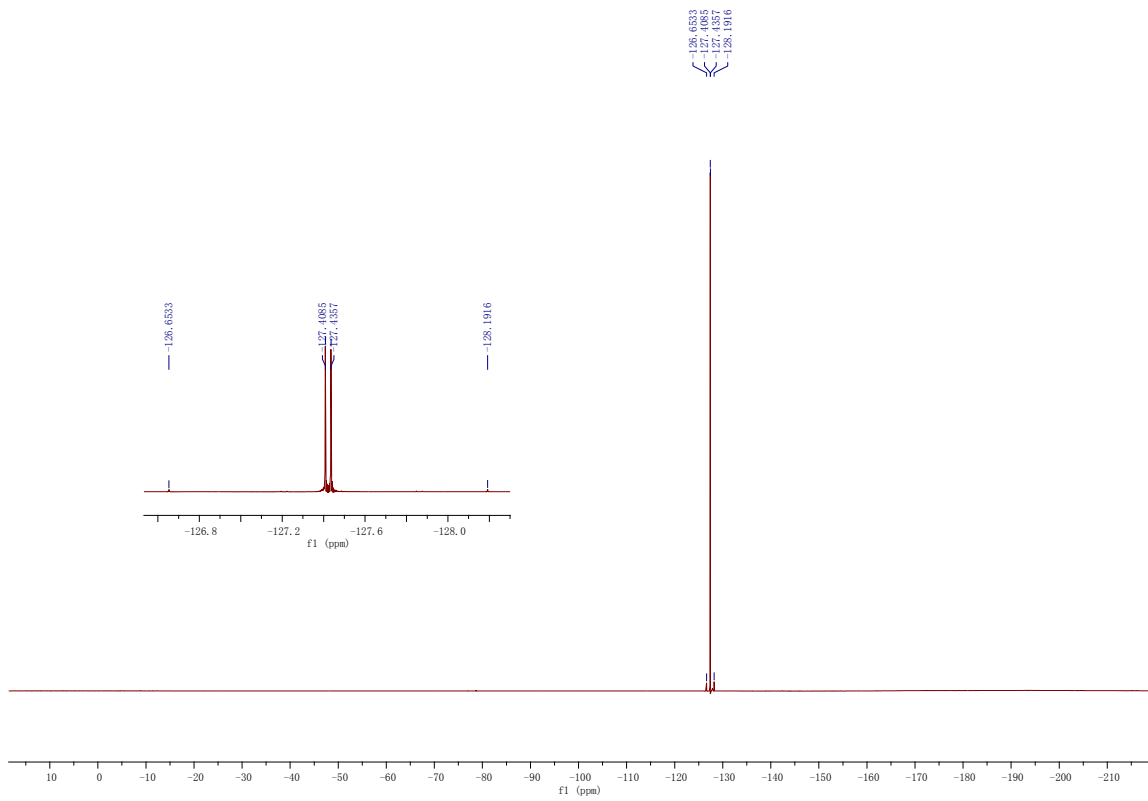

**<sup>1</sup>H NMR**

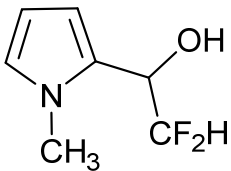

**3q**

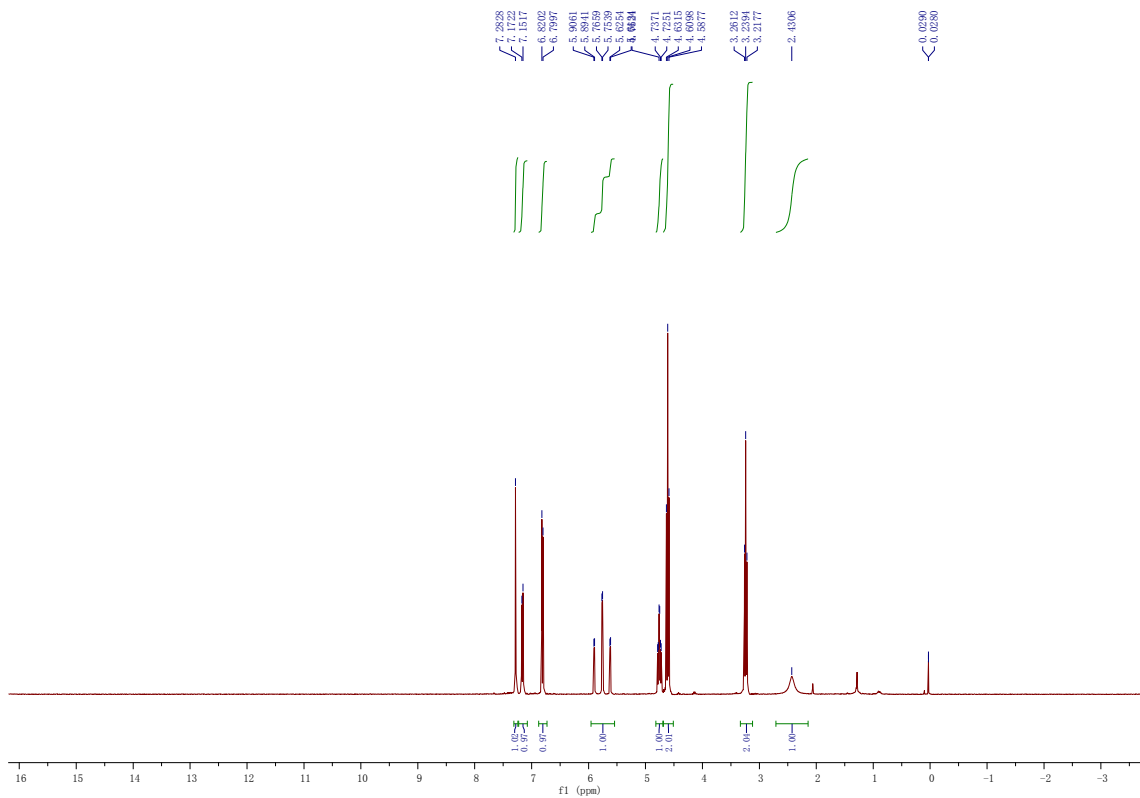

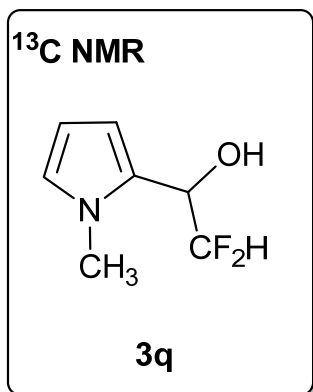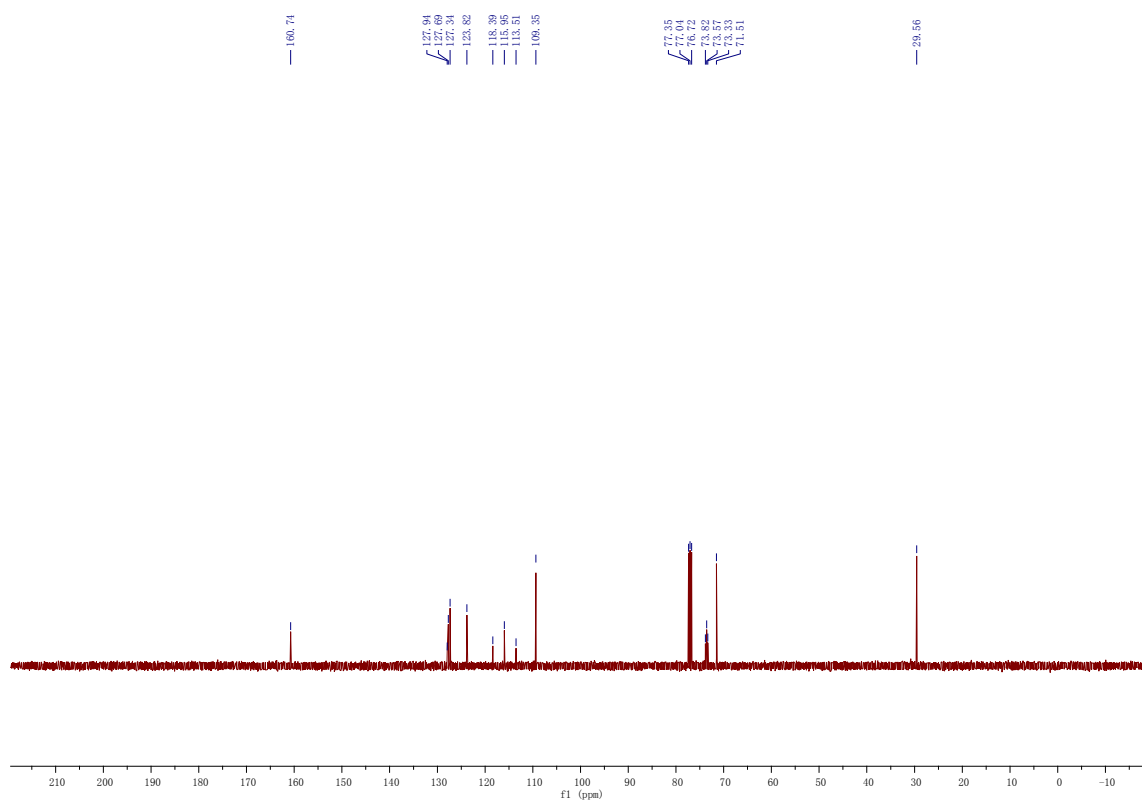

**<sup>19</sup>F NMR**

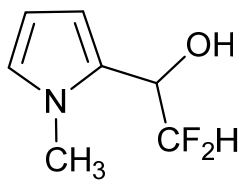

**3q**

< -127.4085  
-127.4121

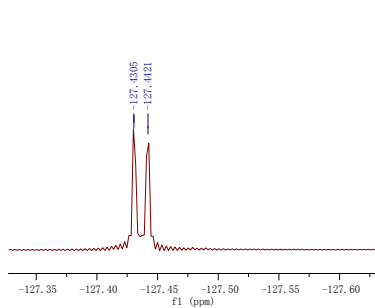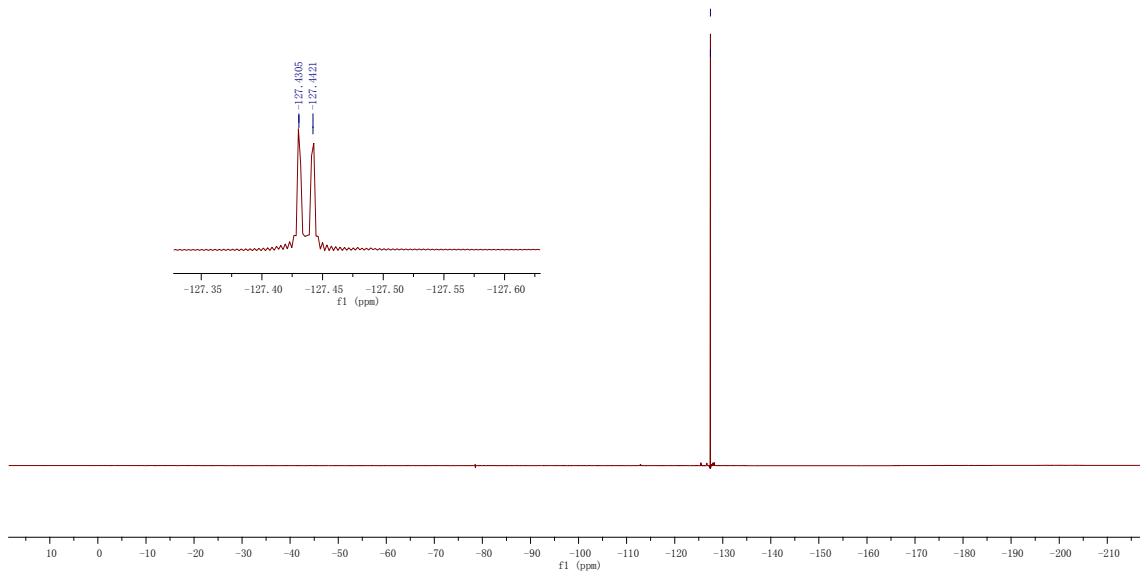

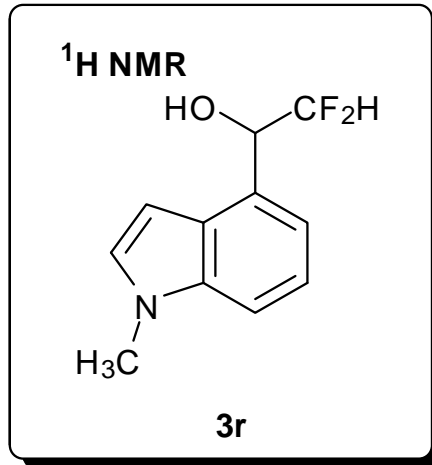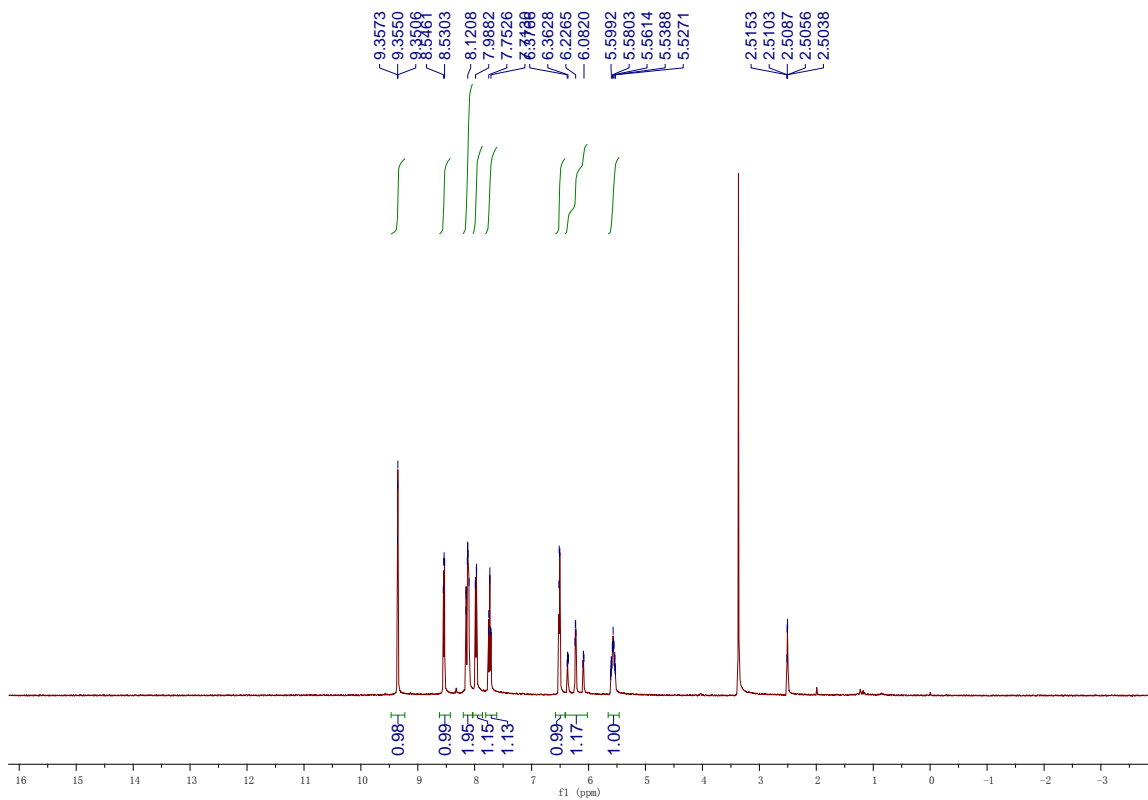





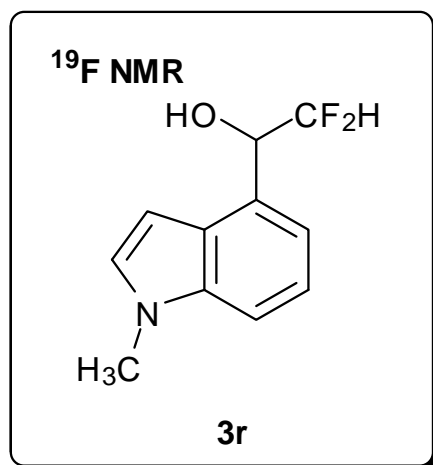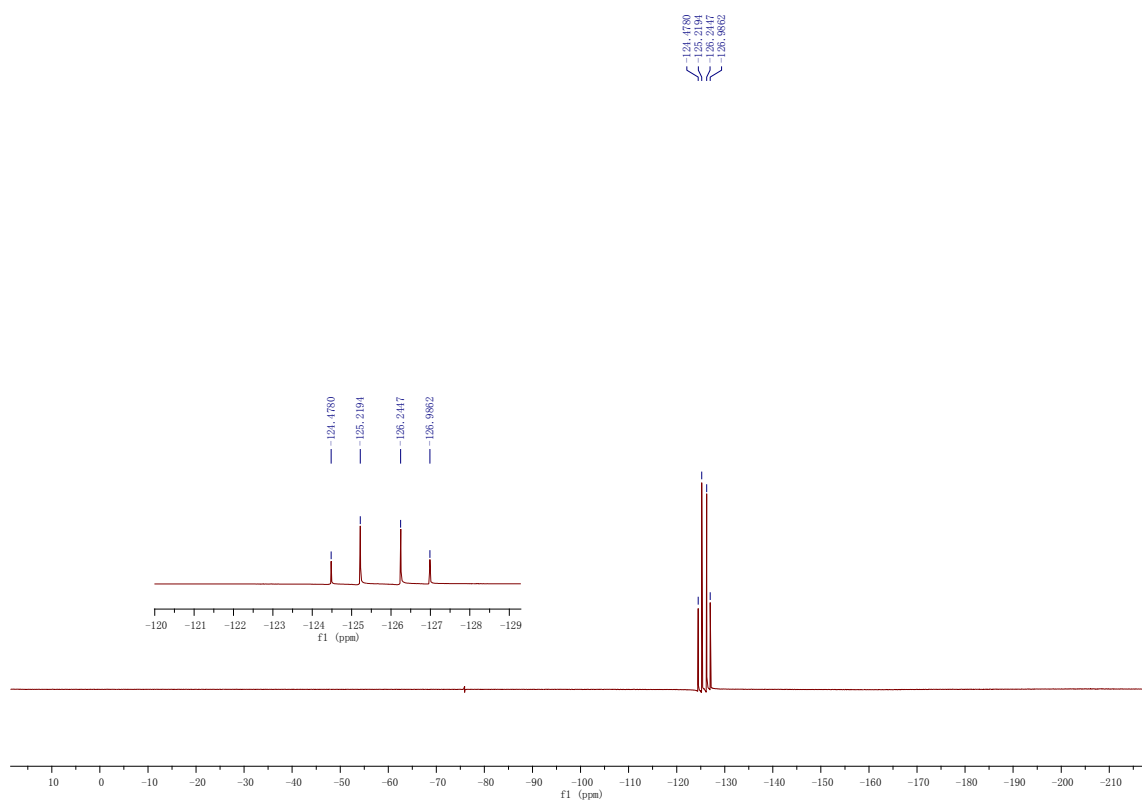

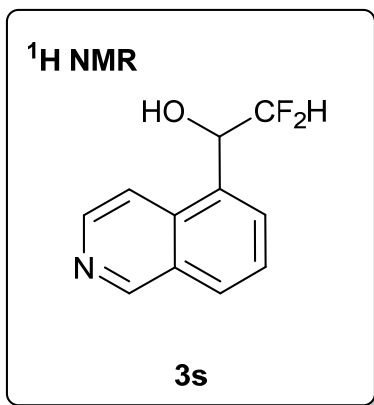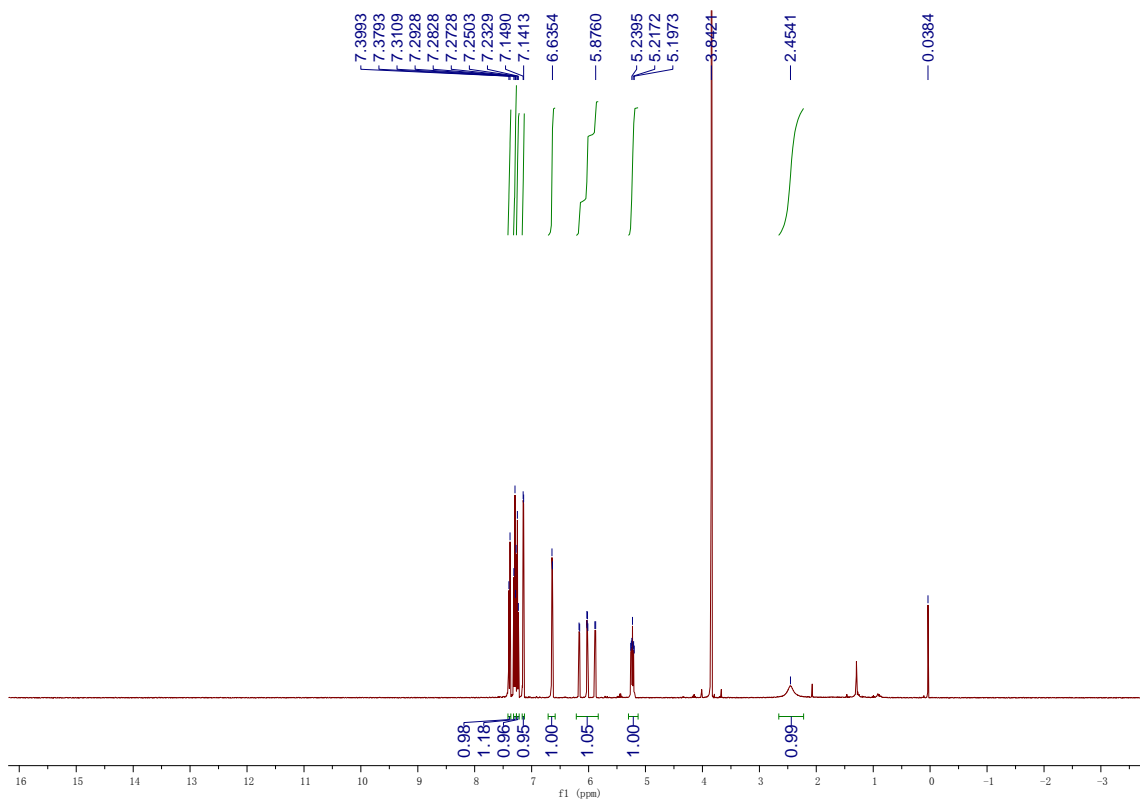

**<sup>13</sup>C NMR**

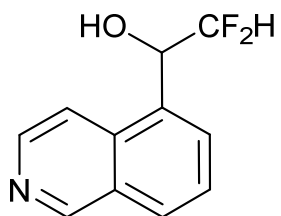

**3s**

136.95  
129.46  
127.80  
126.59  
121.54  
115.96  
115.96  
113.33  
110.18  
99.21  
77.05  
76.72  
76.39  
73.07  
72.80  
33.00

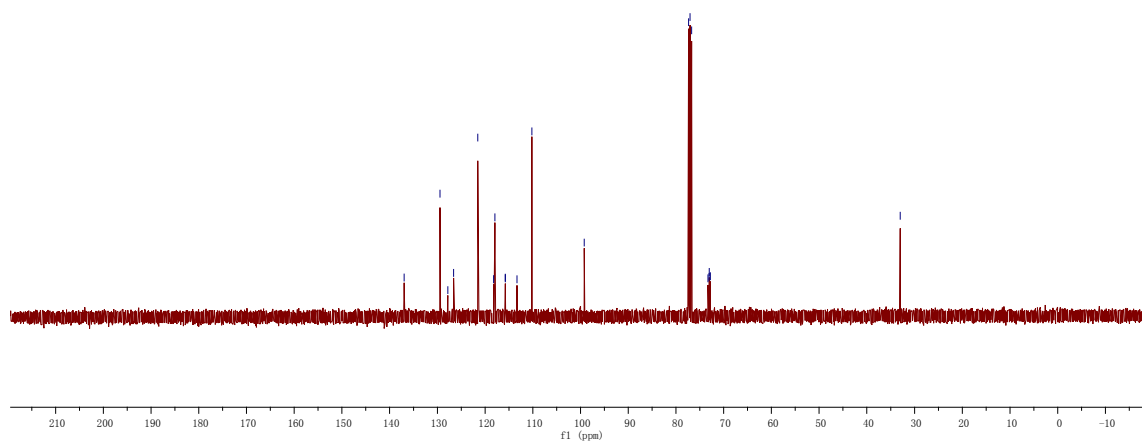

**<sup>19</sup>F NMR**

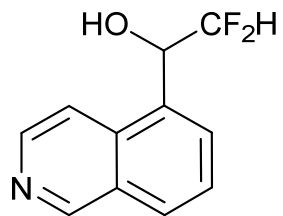

**3s**

-125.2673  
-126.0181  
-126.7335  
-127.4843

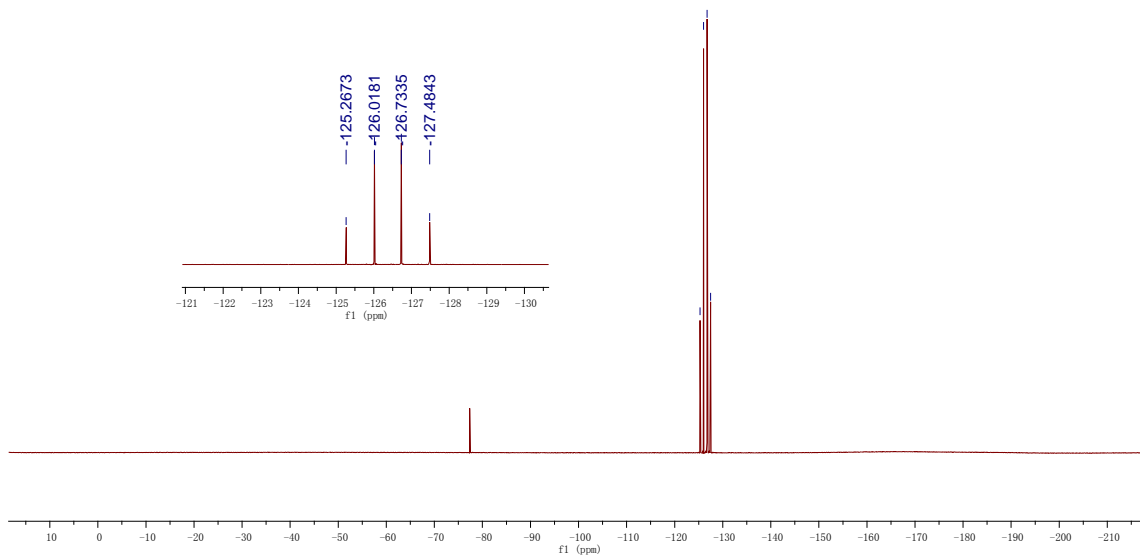

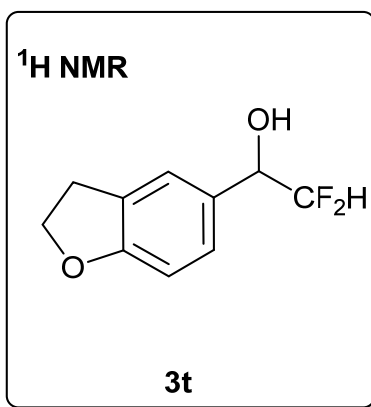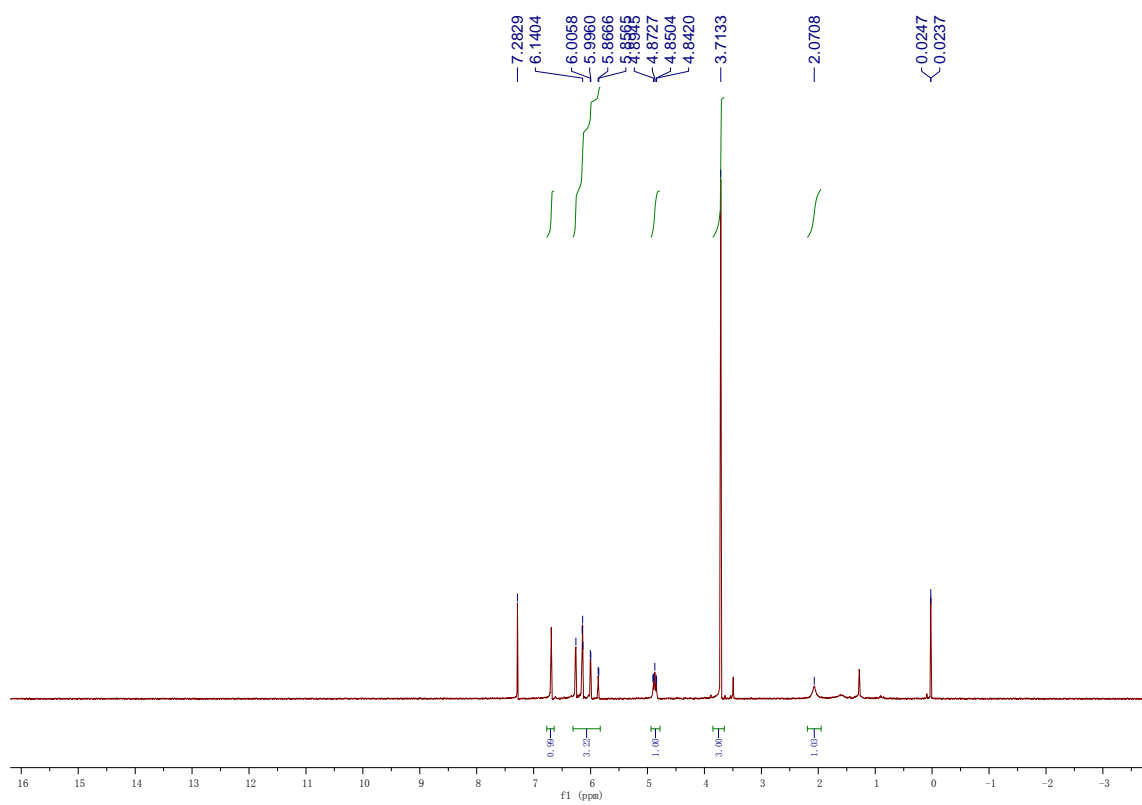



**<sup>19</sup>F NMR**

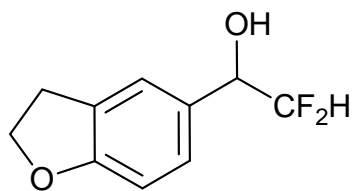

**3t**

-124.9781  
-125.7310  
-127.6188  
-128.4000

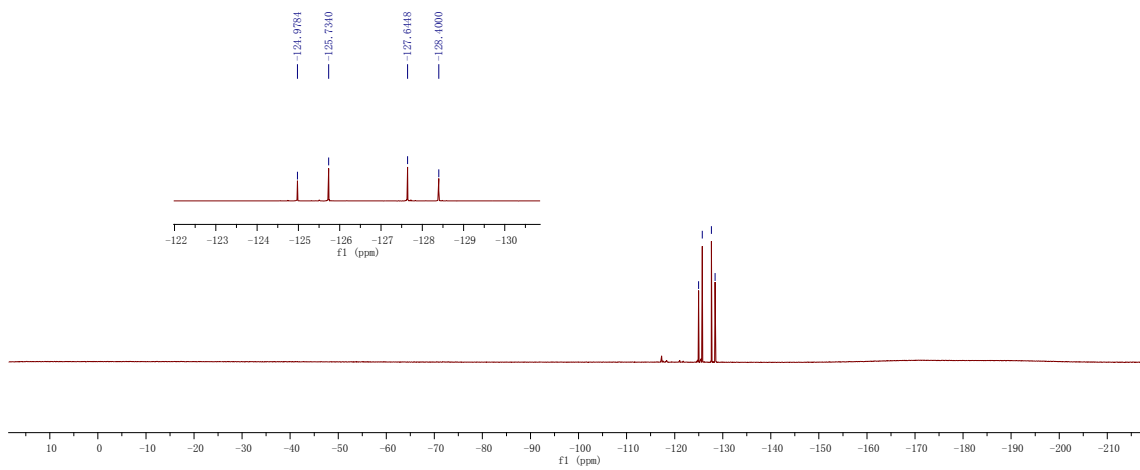

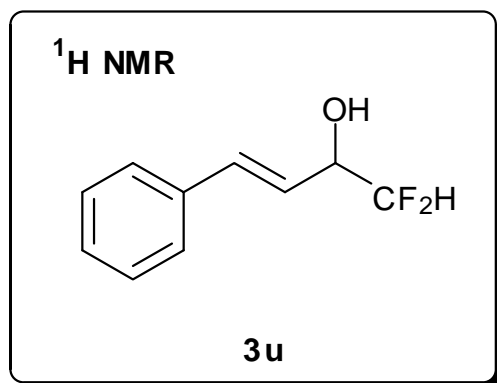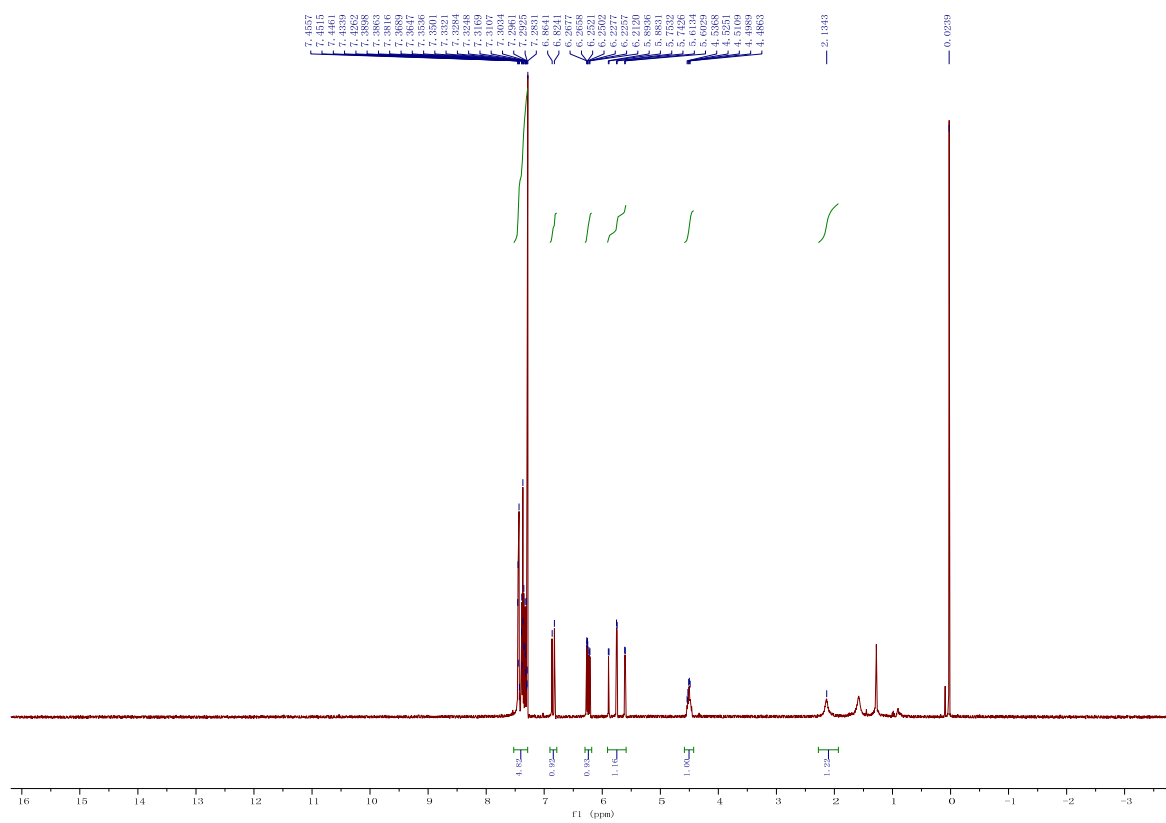





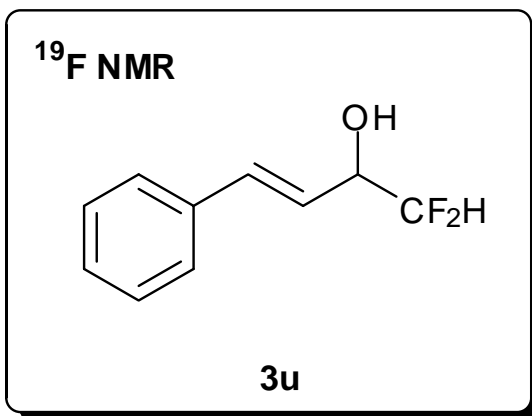

-127.6108  
-128.3709  
-128.9982  
-129.7182

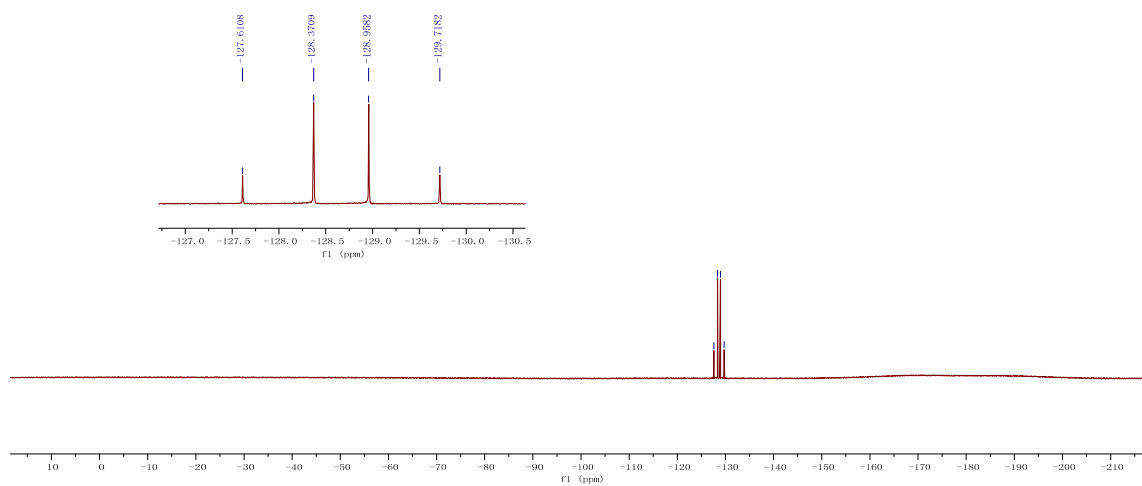

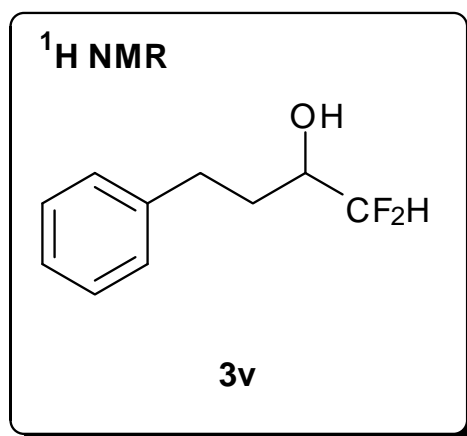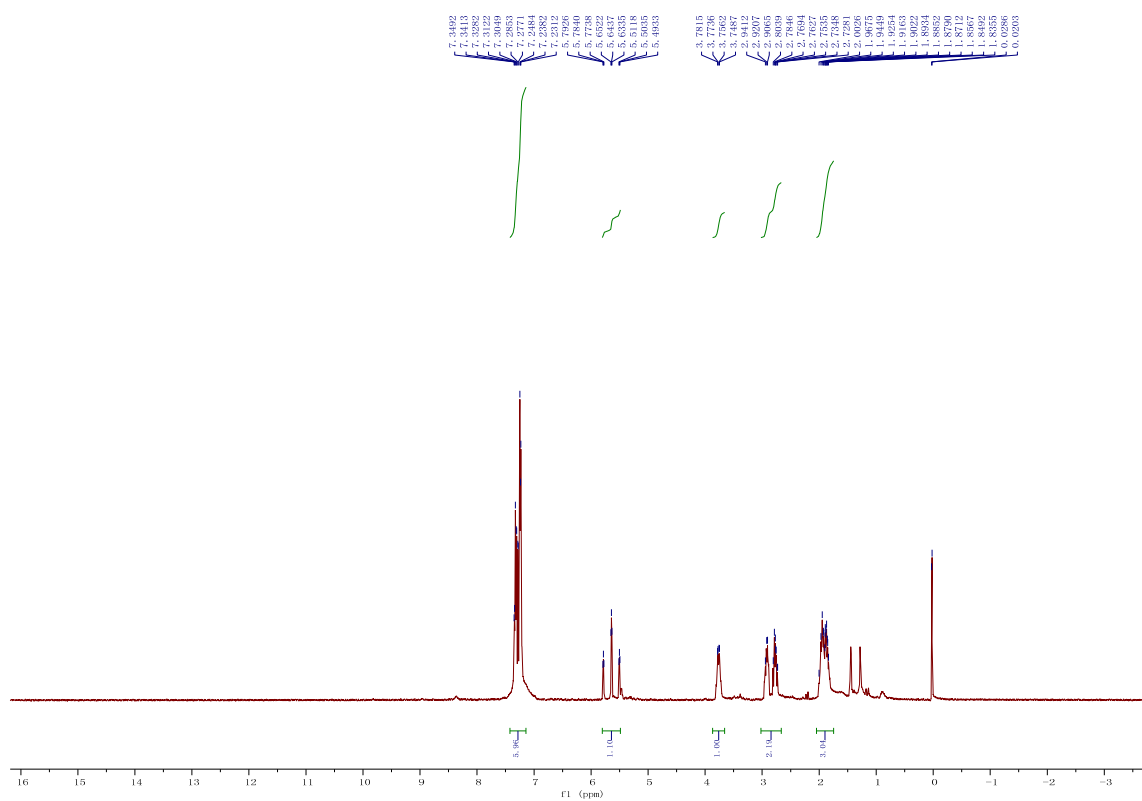

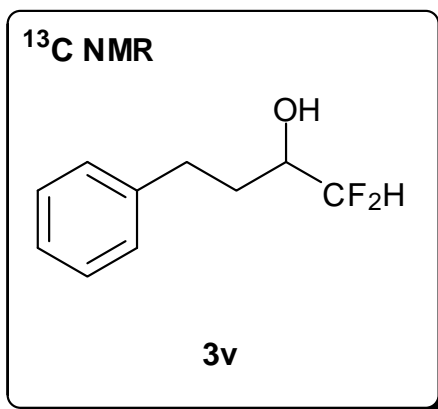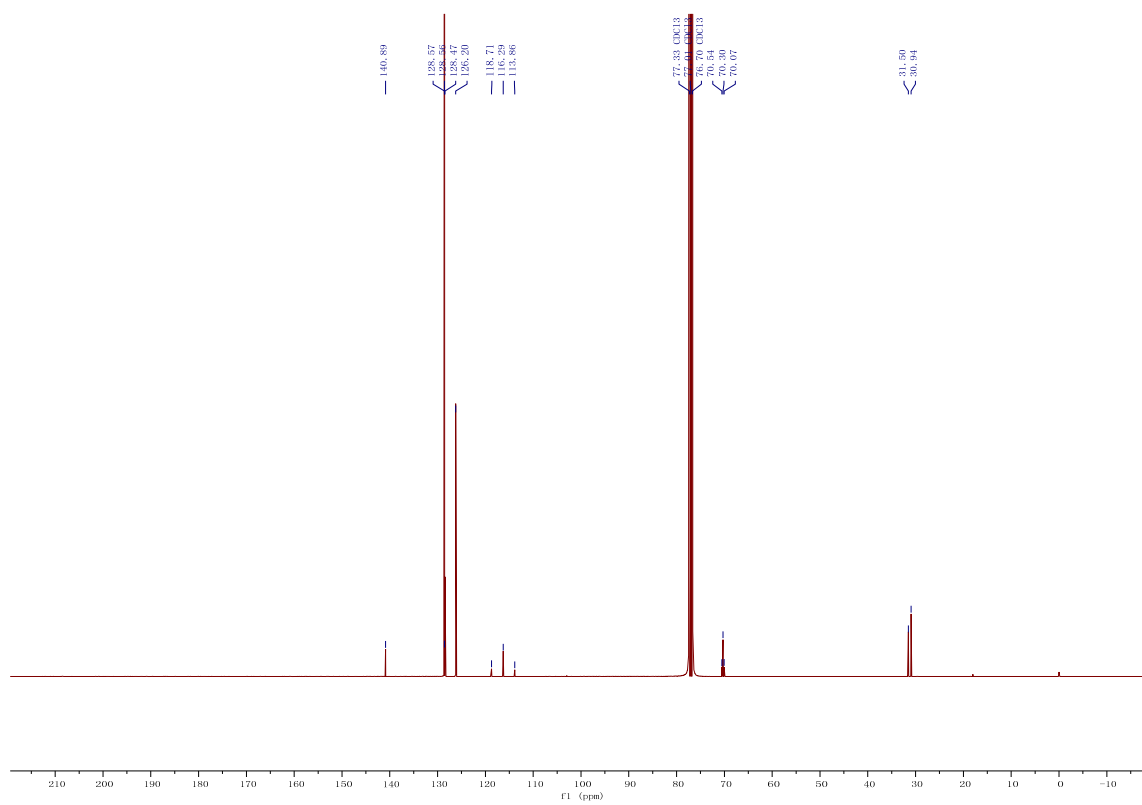

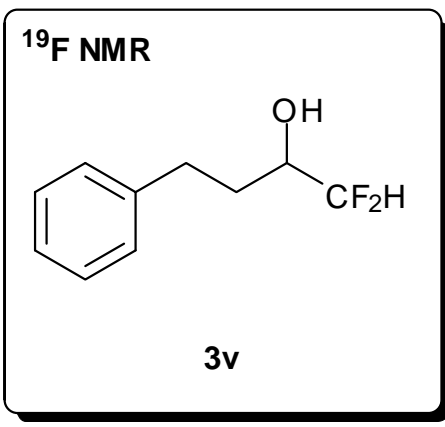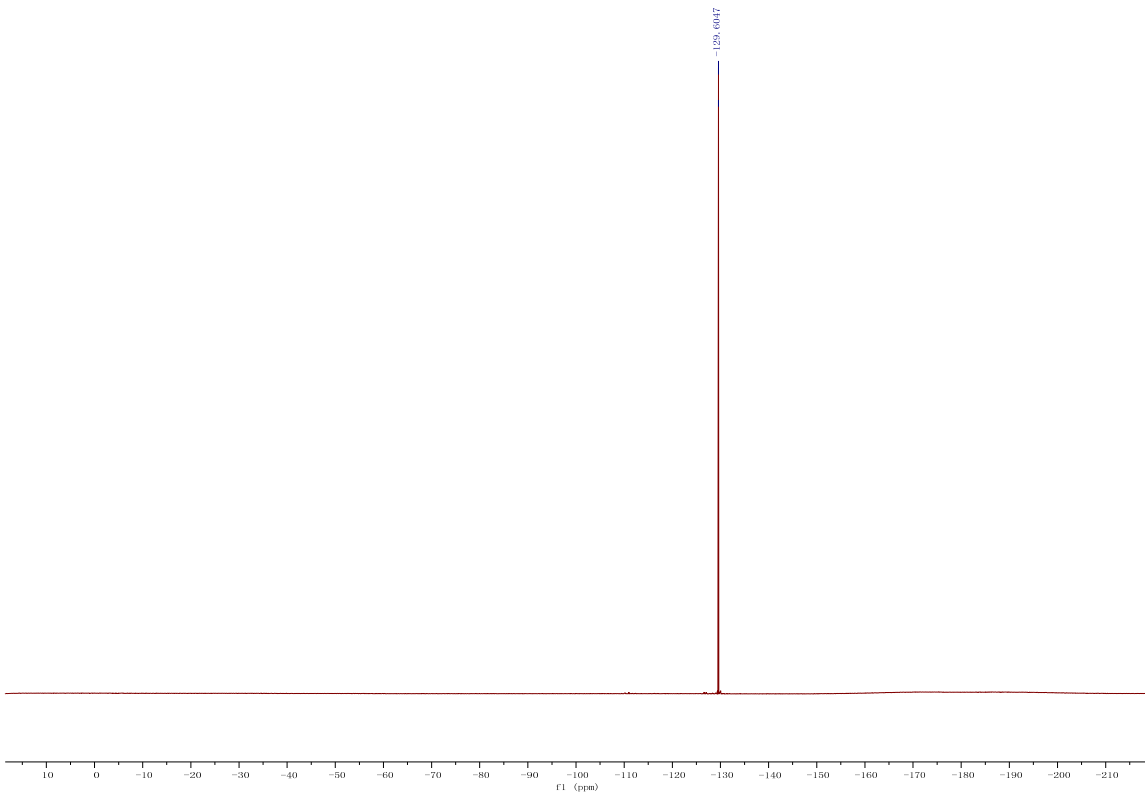

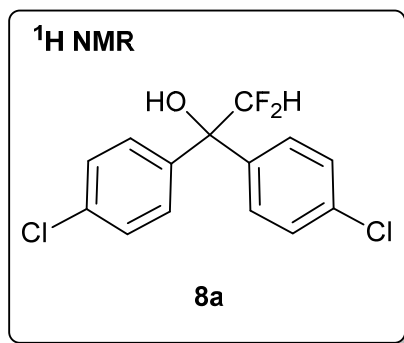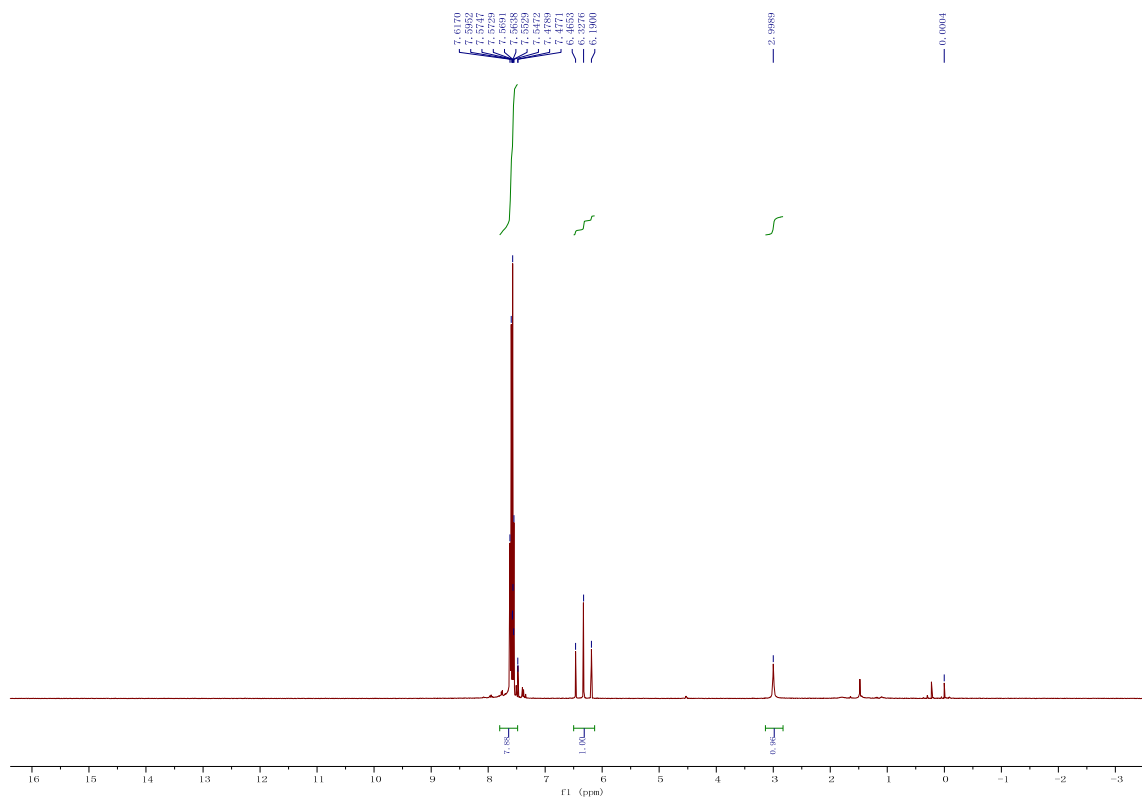

**<sup>13</sup>C NMR**

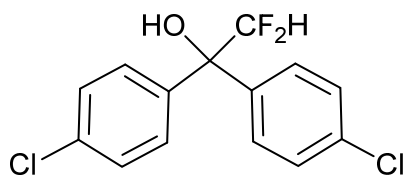

**8a**

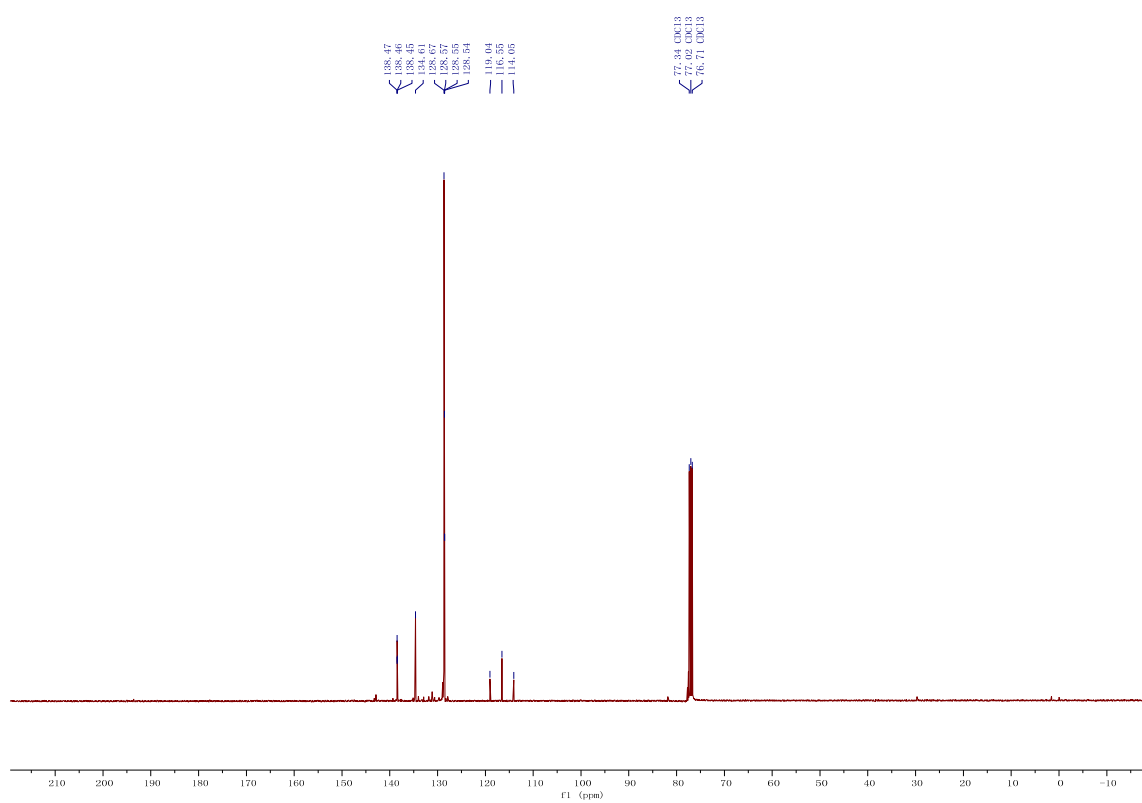

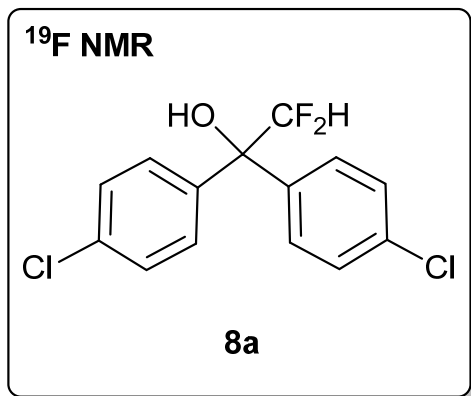

dqf-42c. 4. fid

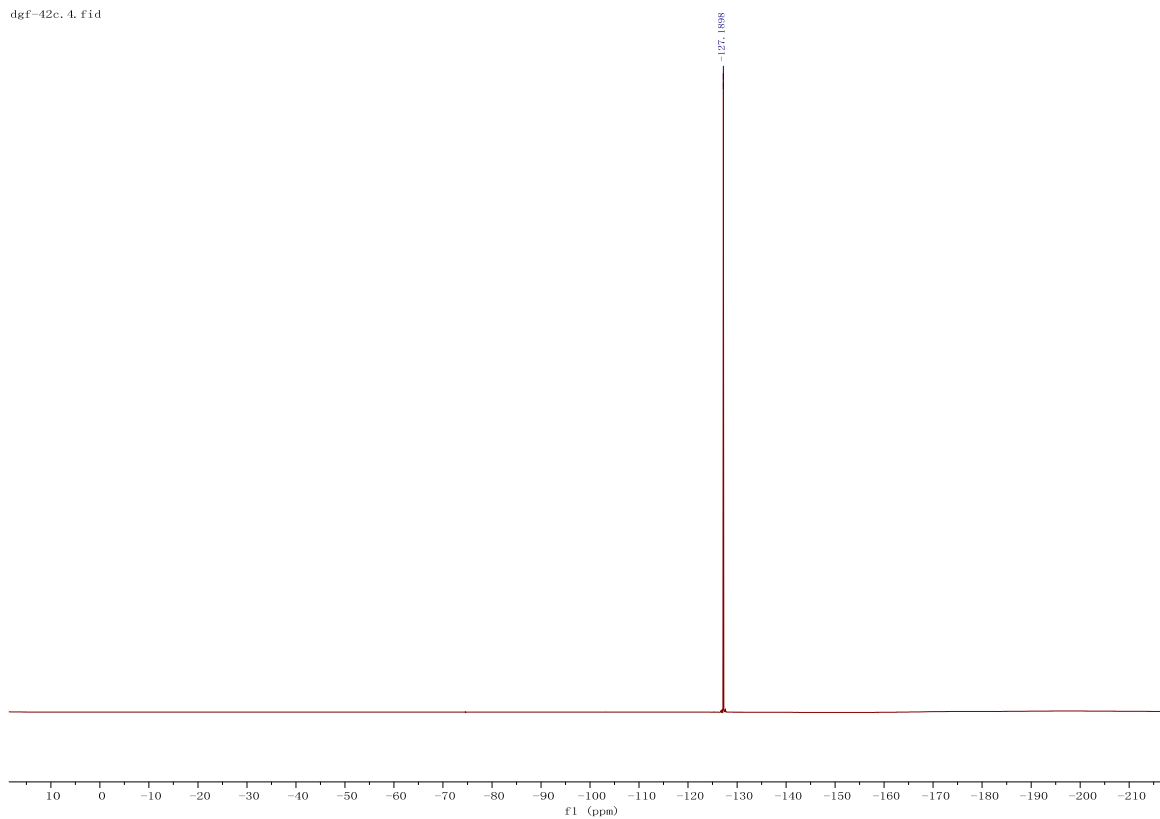



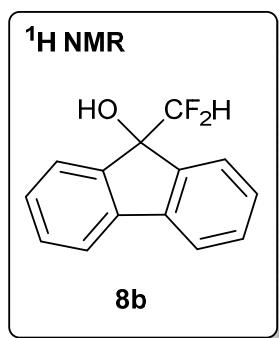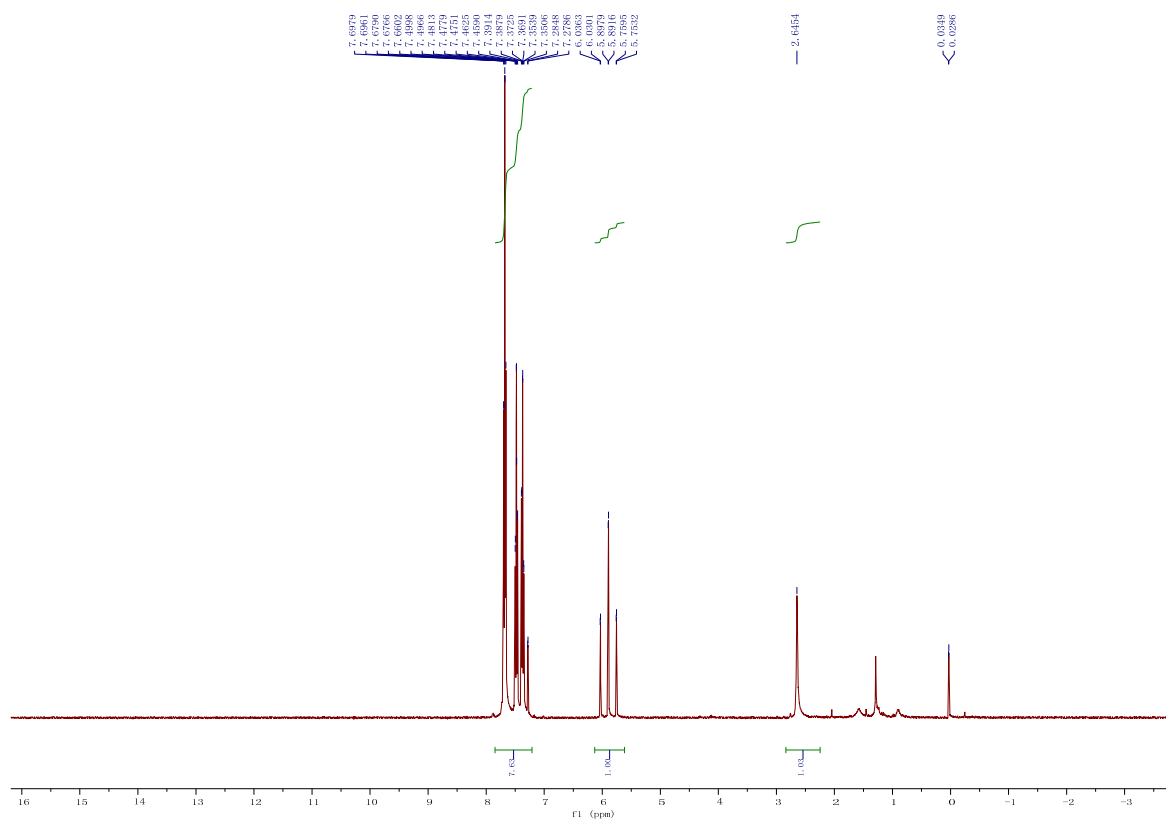

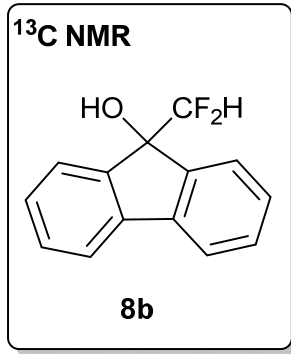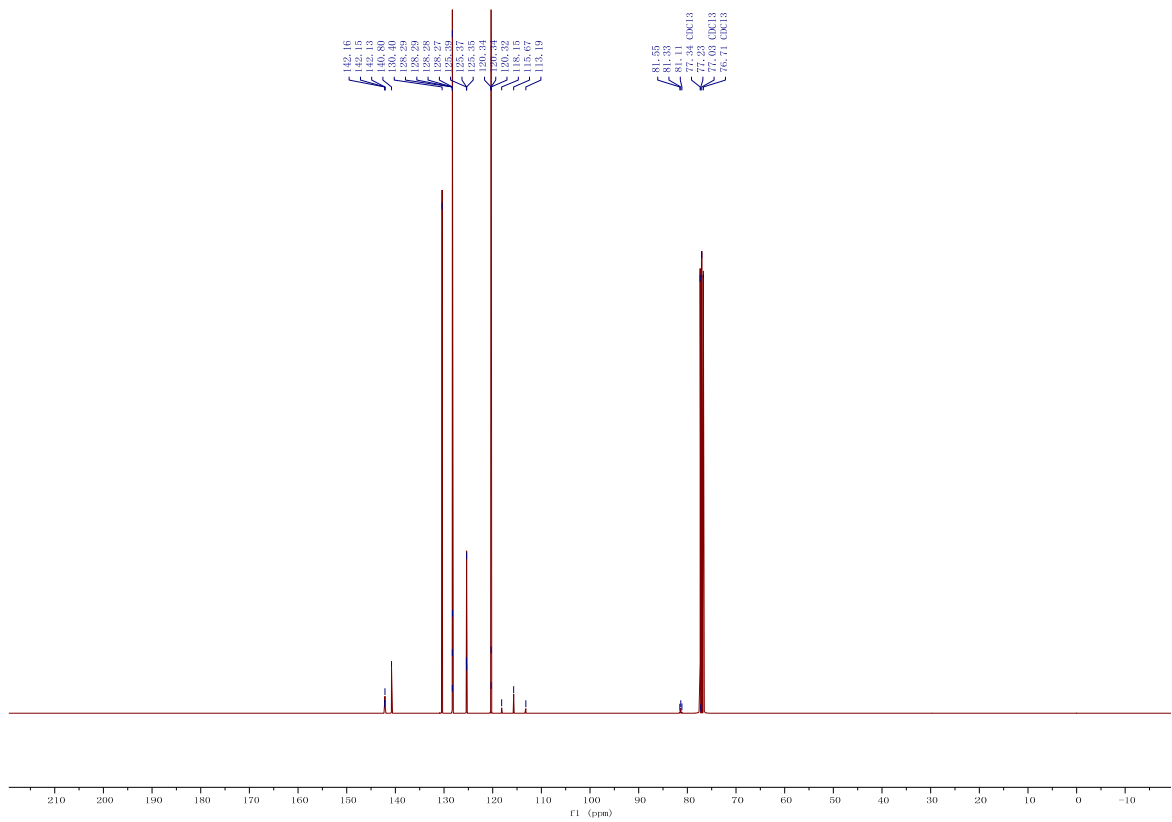

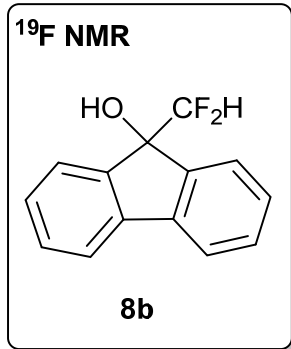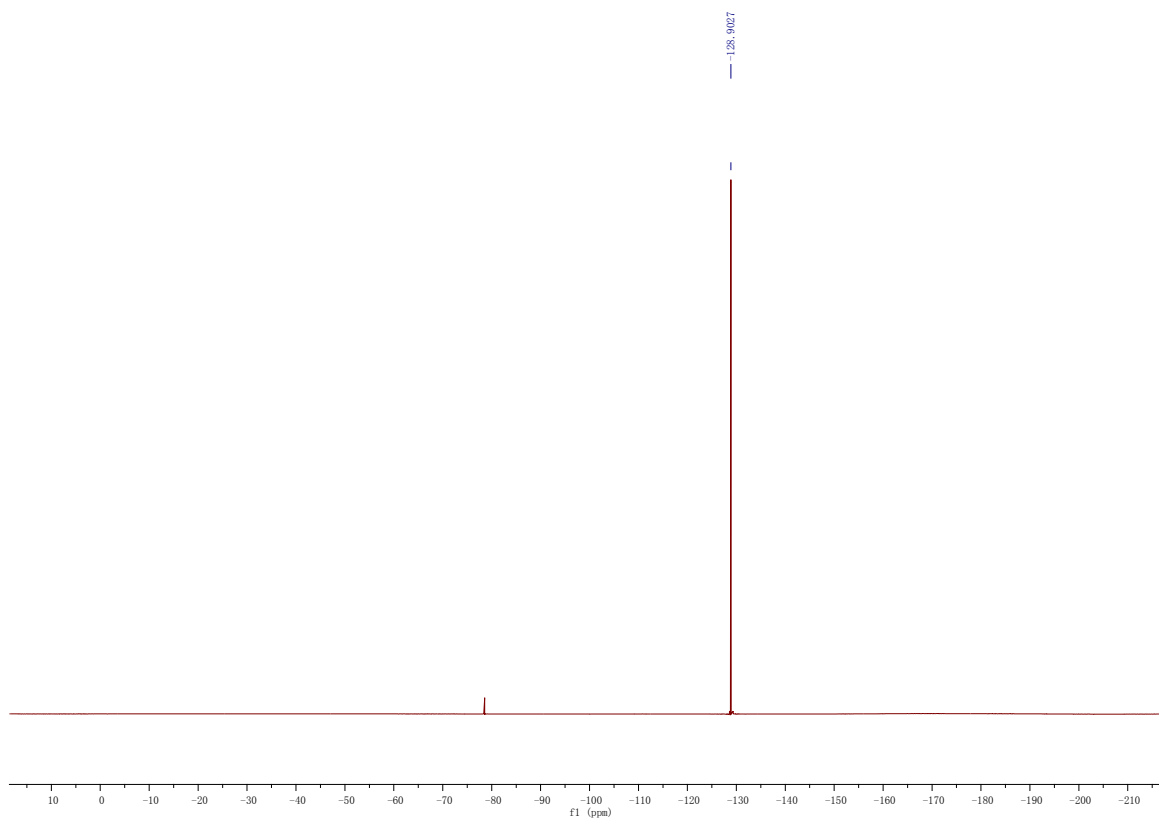

Supplement: c5ra04472c1.pdf [file c5ra04472c1.pdf]
